# Supplementary material for: Prediabetes and risk of mortality, diabetes-related complications and comorbidities: umbrella review of meta-analyses of prospective studies
Source: PubMed Central journal article supplement (PMC8741660; doi:10.1007/s00125-021-05592-3), 2021-10-31
Supplement: 125_2021_5592_MOESM1_ESM.pdf [file 125_2021_5592_MOESM1_ESM.pdf]

## **Electronic supplementary material (ESM)**

### **Prediabetes and risk of mortality, diabetes-related complications and comorbidities: umbrella review of meta-analyses of prospective studies**

Sabrina Schlesinger<sup>1,2</sup>, Manuela Neuenschwander<sup>1,2</sup>, Janett Barbaresko<sup>1</sup>, Alexander Lang<sup>1</sup>,  
Haifa Maalmi<sup>2,3</sup>, Wolfgang Rathmann<sup>1,2</sup>, Michael Roden<sup>2,3,4</sup>, Christian Herder<sup>2,3,4</sup>

<sup>1</sup>Institute for Biometrics and Epidemiology, German Diabetes Center (Deutsches Diabetes-Zentrum/DDZ), Leibniz Center for Diabetes Research at Heinrich Heine University Düsseldorf, Düsseldorf, Germany;

<sup>2</sup>German Center for Diabetes Research (DZD), Partner Düsseldorf, Germany;

<sup>3</sup>Institute for Clinical Diabetology, German Diabetes Center (Deutsches Diabetes-Zentrum/DDZ), Leibniz Center for Diabetes Research at Heinrich Heine University Düsseldorf, Düsseldorf, Germany;

<sup>4</sup>Department of Endocrinology and Diabetology, Medical Faculty and University Hospital, Heinrich-Heine University, Düsseldorf, Germany.

#### **Corresponding author**

Sabrina Schlesinger

E-mail: [sabrina.schlesinger@ddz.de](mailto:sabrina.schlesinger@ddz.de)

**ESM Table 1:** Search strategy for e.g. PubMed

|    |                                                                                                                                                                                                                                                                                                             |
|----|-------------------------------------------------------------------------------------------------------------------------------------------------------------------------------------------------------------------------------------------------------------------------------------------------------------|
| #1 | (Prediabetic State[MeSH] or Glucose Intolerance[MeSH] OR Glycated Hemoglobin A [MeSH]) OR (prediabetes OR prediabetic OR “impaired glucose tolerance” OR IGT OR “impaired fasting glucose” OR IFG OR “impaired FPG”) OR (“HbA(1c)” OR HbA1 OR HbA1c OR “HbA 1c” OR ((glycosylated OR glycated) hemoglobin)) |
| #2 | "systematic review" OR meta-analysis                                                                                                                                                                                                                                                                        |
| #3 | Combine: #1 AND #2                                                                                                                                                                                                                                                                                          |

**ESM Table 2:** Extracted data

|                      |                                                                                                                                                                                                                                                                                                                                                                                                                                                                                                                                                                                             |
|----------------------|---------------------------------------------------------------------------------------------------------------------------------------------------------------------------------------------------------------------------------------------------------------------------------------------------------------------------------------------------------------------------------------------------------------------------------------------------------------------------------------------------------------------------------------------------------------------------------------------|
| From meta-analyses   | <ul style="list-style-type: none"> <li>• name of the first author</li> <li>• publication year</li> <li>• number of included studies</li> <li>• study design of the primary studies</li> <li>• definition of prediabetes</li> <li>• outcome</li> <li>• total number of cases and participants</li> <li>• definition of the comparison</li> <li>• statistical model that had been used to summarize the risk ratios</li> <li>• summary risk ratios and their 95% confidence intervals</li> <li>• confounders</li> <li>• information on funding</li> <li>• and conflict of interest</li> </ul> |
| From primary studies | <ul style="list-style-type: none"> <li>• name of the first author</li> <li>• publication year</li> <li>• country</li> <li>• definition of prediabetes</li> <li>• outcome</li> <li>• number of total cases and participants (if not provided in the meta-analyses)</li> <li>• risk estimates (hazard ratios, relative risks or odds ratios) that adjusted for the most confounders along with their 95% confidence intervals</li> <li>• confounders (if not provided in the meta-analyses)</li> </ul>                                                                                        |

**ESM Table 3:** List of excluded studies

| <b>Reasons for exclusion</b>                                         | <b>Reference</b> |
|----------------------------------------------------------------------|------------------|
| Not relevant exposure, including not relevant prediabetes definition | [1-39]           |
| Not relevant population/in patients with diabetes                    | [40-51]          |
| Not relevant data                                                    | [52-64]          |
| No meta-analysis                                                     | [65-77]          |
| Superseded                                                           | [78-85]          |
| Conference abstract/editorial/comment                                | [86-93]          |
| Not systematic                                                       | [94-97]          |
| Protocol                                                             | [98-100]         |
| Not relevant primary study design                                    | [101-108]        |
| Not relevant outcome                                                 | [109, 110]       |
| Duplicate                                                            | [111-113]        |

**ESM Table 4:** Characteristics of the included meta-analyses on prediabetes and diabetes-related complications, comorbidities, and mortality

| Outcome                                                                       | Reference     | No. of primary studies | Prediabetes definition       | Prediabetes assessment criteria | No. of participants/ No. of cases <sup>a</sup> | Summary HR (95% CI)      | I <sup>2</sup> (%) | τ <sup>2</sup> | 95% PI      |
|-------------------------------------------------------------------------------|---------------|------------------------|------------------------------|---------------------------------|------------------------------------------------|--------------------------|--------------------|----------------|-------------|
| <b>All-cause mortality</b>                                                    |               |                        |                              |                                 |                                                |                          |                    |                |             |
| All-cause mortality                                                           | Cai 2020[114] | 18                     | IFG                          | ADA                             | 6'320'757 / na                                 | <b>1.08 (1.03; 1.13)</b> | 54                 | 0.003          | 0.95; 1.23  |
| All-cause mortality                                                           | Cai 2020[114] | 19                     | IFG                          | WHO                             | 325'446 / na                                   | <b>1.13 (1.05; 1.20)</b> | 41                 | 0.007          | 0.93; 1.36  |
| All-cause mortality                                                           | Cai 2020[114] | 15                     | IGT                          | ADA/WHO                         | 210'114 / na                                   | <b>1.25 (1.17; 1.32)</b> | 28                 | 0.003          | 1.08; 1.44  |
| All-cause mortality                                                           | Cai 2020[114] | 7                      | HbA <sub>1c</sub>            | ADA                             | 241'654 / na                                   | 0.98 (0.91; 1.05)        | 11                 | 0.001          | 0.87; 1.11  |
| All-cause mortality                                                           | Cai 2020[114] | 2                      | IFG and/or IGT               | ADA                             | 2428 / na                                      | 1.14 (0.82; 1.58)        | 0                  | 0.000          | na          |
| All-cause mortality                                                           | Cai 2020[114] | 8                      | IFG and/or IGT               | WHO                             | 277'949 / na                                   | <b>1.17 (1.13; 1.20)</b> | 0                  | 0.000          | 1.12; 1.21  |
| All-cause mortality                                                           | Cai 2020[114] | 4                      | IFG and/or HbA <sub>1c</sub> | ADA                             | 308'326 / na                                   | 1.05 (0.94; 1.16)        | 0                  | 0.000          | 0.88; 1.24  |
| Long-term all-cause mortality (in patients after PCI)                         | Li 2020[115]  | 3                      | HbA <sub>1c</sub>            | ADA                             | 4085 / 298                                     | 1.18 (0.92; 1.50)        | 0                  | 0.000          | 0.24; 5.72  |
| Short-term all-cause mortality (in patients after PCI)                        | Li 2020[115]  | 2                      | HbA <sub>1c</sub>            | ADA                             | 3633 / 122                                     | 1.00 (0.69; 1.44)        | 0                  | 0.000          | na          |
| All-cause mortality (in patients with atherosclerotic cardiovascular disease) | Cai 2020[114] | 5                      | IFG                          | ADA                             | 6633 / na                                      | 1.60 (1.15; 2.22)        | 70                 | 0.091          | 0.54; 4.78  |
| All-cause mortality (in patients with atherosclerotic cardiovascular disease) | Cai 2020[114] | 5                      | IFG                          | WHO                             | 29497 / 6492                                   | 1.19 (0.98; 1.45)        | 65                 | 0.023          | 0.67; 2.12  |
| All-cause mortality (in patients with atherosclerotic cardiovascular disease) | Cai 2020[114] | 3                      | IGT                          | ADA/WHO                         | 1919 / 140                                     | 1.34 (0.94; 1.93)        | 0                  | 0.000          | 0.13; 14.00 |

|                                                                                  |               |   |                   |     |            |                   |    |       |    |
|----------------------------------------------------------------------------------|---------------|---|-------------------|-----|------------|-------------------|----|-------|----|
| All-cause mortality<br>(in patients with atherosclerotic cardiovascular disease) | Cai 2020[114] | 2 | HbA <sub>1c</sub> | ADA | 3205 / 137 | 2.30 (0.56; 9.41) | 77 | 0.814 | na |
| All-cause mortality<br>(in patients with atherosclerotic cardiovascular disease) | Cai 2020[114] | 2 | IFG and/or IGT    | ADA | 1067 / na  | 1.62 (0.96; 2.73) | 0  | 0.000 | na |
| All-cause mortality<br>(in patients with atherosclerotic cardiovascular disease) | Cai 2020[114] | 2 | IFG and/or IGT    | WHO | 2406 / na  | 1.07 (0.75; 1.52) | 0  | 0.000 | na |

### Cardiovascular outcomes & cardiovascular mortality

|                                                                        |               |    |                                         |         |                |                          |    |       |            |
|------------------------------------------------------------------------|---------------|----|-----------------------------------------|---------|----------------|--------------------------|----|-------|------------|
| CV events                                                              | Cai 2020[114] | 22 | IFG                                     | ADA     | 1'190'425 / na | <b>1.09 (1.03; 1.15)</b> | 61 | 0.008 | 0.90; 1.32 |
| CV events                                                              | Cai 2020[114] | 25 | IFG                                     | WHO     | 344'915 / na   | <b>1.20 (1.09; 1.34)</b> | 60 | 0.032 | 0.82; 1.77 |
| CV events                                                              | Cai 2020[114] | 19 | IGT                                     | ADA/WHO | 223'370 / na   | <b>1.23 (1.13; 1.34)</b> | 44 | 0.012 | 0.96; 1.58 |
| CV events                                                              | Cai 2020[114] | 8  | HbA <sub>1c</sub>                       | ADA     | 255'198 / na   | 1.05 (0.97; 1.13)        | 42 | 0.005 | 0.86; 1.27 |
| CV events                                                              | Cai 2020[114] | 2  | IFG and/or IGT                          | ADA     | 2760 / na      | 1.15 (0.91; 1.45)        | 0  | 0.000 | na         |
| CV events                                                              | Cai 2020[114] | 7  | IFG and/or IGT                          | WHO     | 276'787 / na   | 1.10 (0.99; 1.21)        | 25 | 0.004 | 0.89; 1.35 |
| CV events                                                              | Cai 2020[114] | 6  | IFG and/or HbA <sub>1c</sub>            | ADA     | 319'644 / na   | 1.05 (0.97; 1.13)        | 0  | 0.000 | 0.94; 1.16 |
| CV events                                                              | Cai 2020[114] | 2  | IFG and/or HbA <sub>1c</sub> and/or IGT | ADA     | 86'808 / na    | 0.98 (0.92; 1.05)        | 0  | 0.000 | na         |
| CV events<br>(in patients with atherosclerotic cardiovascular disease) | Cai 2020[114] | 6  | IFG                                     | ADA     | 9370 / na      | <b>1.33 (1.02; 1.75)</b> | 81 | 0.085 | 0.54; 3.28 |
| CV events<br>(in patients with atherosclerotic cardiovascular disease) | Cai 2020[114] | 5  | IFG                                     | WHO     | 16558 / na     | 1.49 (0.99; 2.24)        | 83 | 0.141 | 0.38; 5.82 |

|                                                                        |                 |    |                                         |         |                |                          |    |       |             |
|------------------------------------------------------------------------|-----------------|----|-----------------------------------------|---------|----------------|--------------------------|----|-------|-------------|
| CV events<br>(in patients with atherosclerotic cardiovascular disease) | Cai 2020[114]   | 6  | IGT                                     | ADA/WHO | 6369 / na      | <b>1.52 (1.24; 1.85)</b> | 0  | 0.000 | 1.15; 2.01  |
| CV events<br>(in patients with atherosclerotic cardiovascular disease) | Cai 2020[114]   | 4  | HbA <sub>1c</sub>                       | ADA     | 10990 / na     | <b>1.24 (1.05; 1.48)</b> | 0  | 0.000 | 0.85; 1.81  |
| CV events<br>(in patients with atherosclerotic cardiovascular disease) | Cai 2020[114]   | 2  | IFG and/or HbA <sub>1c</sub>            | ADA     | 7153 / 209     | <b>1.61 (1.07; 2.43)</b> | 2  | 0.002 | na          |
| CV events<br>(in patients with atherosclerotic cardiovascular disease) | Cai 2020[114]   | 2  | IFG and/or HbA <sub>1c</sub> and/or IGT | ADA     | 3455 / na      | 1.16 (0.86; 1.57)        | 0  | 0.000 | na          |
| CV mortality <sup>c</sup>                                              | Huang 2016[116] | 6  | IFG                                     | ADA     | na / na        | <b>1.27 (1.02; 1.58)</b> | na | na    | na          |
| CV mortality <sup>c</sup>                                              | Huang 2016[116] | 13 | IFG                                     | WHO     | na / na        | <b>1.20 (1.05; 1.38)</b> | na | na    | na          |
| CV mortality <sup>c</sup>                                              | Huang 2016[116] | 9  | IGT                                     | ADA/WHO | na / na        | <b>1.30 (1.18; 1.44)</b> | na | na    | na          |
| CVD incidence <sup>c</sup>                                             | Huang 2016[116] | 9  | IFG                                     | ADA     | na / na        | <b>1.10 (1.03, 1.18)</b> | na | na    | na          |
| CVD incidence <sup>c</sup>                                             | Huang 2016[116] | 5  | IFG                                     | WHO     | na / na        | <b>1.39 (1.15, 1.68)</b> | na | na    | na          |
| CVD incidence <sup>c</sup>                                             | Huang 2016[116] | 4  | IGT                                     | ADA/WHO | na / na        | <b>1.29 (1.11, 1.50)</b> | na | na    | na          |
| CHD                                                                    | Cai 2020[114]   | 22 | IFG                                     | ADA     | 1'207'240 / na | <b>1.09 (1.05; 1.13)</b> | 4  | 0.000 | 1.03; 1.15  |
| CHD                                                                    | Cai 2020[114]   | 12 | IFG                                     | WHO     | 86'407 / na    | <b>1.17 (1.09; 1.26)</b> | 0  | 0.000 | 1.08; 1.28  |
| CHD                                                                    | Cai 2020[114]   | 11 | IGT                                     | ADA/WHO | 50'506 / na    | <b>1.21 (1.09; 1.34)</b> | 0  | 0.000 | 1.07; 1.36  |
| CHD                                                                    | Cai 2020[114]   | 3  | HbA <sub>1c</sub>                       | ADA     | 81'949 / na    | <b>1.30 (1.04; 1.62)</b> | 76 | 0.028 | 0.10; 16.90 |
| CHD                                                                    | Cai 2020[114]   | 5  | IFG and/or IGT                          | WHO     | 50'217 / na    | <b>1.17 (1.02; 1.35)</b> | 0  | 0.000 | 0.94; 1.47  |
| CHD                                                                    | Cai 2020[114]   | 2  | IFG and/or HbA <sub>1c</sub>            | ADA     | 73'987 / na    | 1.11 (0.88; 1.39)        | 0  | 0.000 | na          |

|                                                                     |                   |    |                              |          |                |                           |      |       |             |
|---------------------------------------------------------------------|-------------------|----|------------------------------|----------|----------------|---------------------------|------|-------|-------------|
| CHD<br>(in patients with atherosclerotic cardiovascular disease)    | Cai 2020[114]     | 2  | IFG                          | ADA      | 2967 / 536     | 1.10 (0.92; 1.30)         | 0    | 0.000 | na          |
| CHD<br>(in patients with atherosclerotic cardiovascular disease)    | Cai 2020[114]     | 2  | IFG                          | WHO      | 11829 / 650    | 1.24 (0.99; 1.56)         | 0    | 0.000 | na          |
| CHD<br>(in patients with atherosclerotic cardiovascular disease)    | Cai 2020[114]     | 3  | IGT                          | ADA/WHO  | 2545 / 209     | 1.14 (0.84; 1.54)         | 0    | 0.000 | 0.16; 8.10  |
| CHD<br>(in patients with atherosclerotic cardiovascular disease)    | Cai 2020[114]     | 2  | HbA <sub>1c</sub>            | ADA      | 6782 / 91      | 1.16 (0.65; 2.05)         | 0    | 0.001 | na          |
| Stroke                                                              | Cai 2020[114]     | 16 | IFG                          | ADA      | 1'635'506 / na | <b>1.06 (1.01; 1.11)</b>  | 16   | 0.001 | 0.97; 1.16  |
| Stroke                                                              | Cai 2020[114]     | 8  | IFG                          | WHO      | 698'478 / na   | <b>1.18 (1.10; 1.26)</b>  | 0    | 0.000 | 1.08; 1.28  |
| Stroke                                                              | Cai 2020[114]     | 8  | IGT                          | ADA/WHO  | 31'047 / na    | <b>1.30 (1.10; 1.54)</b>  | 42   | 0.022 | 0.86; 1.98  |
| Stroke                                                              | Mitsios 2018[117] | 4  | HbA <sub>1c</sub>            | ADA      | 44'431 / 1578  | 1.19 (0.87; 1.63)         | 61.9 | 0.054 | 0.35; 4.00  |
| Stroke                                                              | Cai 2020[114]     | 2  | IFG and/or IGT               | WHO      | 3013 / na      | 1.16 (0.81; 1.65)         | 0    | 0.000 | na          |
| Stroke                                                              | Cai 2020[114]     | 2  | IFG and/or HbA <sub>1c</sub> | ADA      | 73'987 / na    | 1.01 (0.79; 1.30)         | 0    | 0.000 | na          |
| Stroke<br>(in patients with atherosclerotic cardiovascular disease) | Cai 2020[114]     | 2  | IFG                          | ADA      | 2967 / 287     | 0.99 (0.63; 1.54)         | 62   | 0.068 | na          |
| Atrial fibrillation                                                 | Aune 2018[118]    | 3  | IFG                          | ADA/ WHO | 248'598 / 3301 | <b>1.13 (1.003; 1.27)</b> | 0    | 0.000 | 0.52; 2.45  |
| Atrial fibrillation                                                 | Aune 2018[118]    | 3  | IFG                          | ADA      | 248'598 / 3301 | <b>1.13 (1.03; 1.24)</b>  | 0    | 0.000 | 0.63; 2.04  |
| Heart failure                                                       | Cai 2021          | 10 | IFG                          | ADA      | 8'962'851 / na | <b>1.10 (1.06, 1.14)</b>  | 55   | 0.001 | 1.01; 1.20  |
| Heart failure                                                       | Cai 2021          | 6  | IFG                          | WHO      | 22941 / na     | <b>1.18 (1.07, 1.30)</b>  | 0    | 0.000 | 1.3; 1.36   |
| Heart failure                                                       | Cai 2021          | 3  | IGT                          | ADA/ WHO | 2317 / 271     | <b>1.58 (1.04, 2.39)</b>  | 26   | 0.042 | 0.04; 65.80 |

|                                                                              |                |    |                              |          |            |                          |      |       |              |
|------------------------------------------------------------------------------|----------------|----|------------------------------|----------|------------|--------------------------|------|-------|--------------|
| Sudden cardiac death                                                         | Aune 2018[119] | 2  | IFG / IGT                    | ADA      | 7766 / 215 | <b>1.52 (1.08; 2.14)</b> | 0    | 0.000 | na           |
| Stroke (in patients with history of stroke/TIA)                              | Pan 2019[112]  | 3  | IFG / IGT                    | ADA /WHO | 8865 / na  | 1.45 (0.98; 2.14)        | 42   | 0.051 | 0.03; 65.75  |
| Stroke (in patients with history of stroke/TIA)                              | Pan 2019[112]  | 2  | IFG                          | WHO      | 6022 / na  | 1.17 (0.55; 2.48)        | 64.6 | 0.203 | na           |
| Poor outcome of stroke (in patients with history of stroke/TIA) <sup>b</sup> | Pan 2019[112]  | 5  | IFG / IGT/ HbA <sub>1c</sub> | ADA /WHO | 7045 / na  | <b>1.41 (1.01; 1.97)</b> | 56   | 0.044 | 0.50; 3.95   |
| Poor outcome of stroke (in patients with history of stroke/TIA) <sup>b</sup> | Pan 2019[112]  | 2  | IFG                          | WHO      | 6022 / na  | <b>1.41 (1.05; 1.90)</b> | 29.9 | 0.014 | na           |
| Stroke mortality (in patients with history of stroke/TIA)                    | Pan 2019[112]  | 4  | IFG/IGT                      | ADA/ WHO | 6850 / na  | 1.40 (0.68; 2.91)        | 65   | 0.340 | 0.07; 27.52  |
| Stroke mortality (in patients with history of stroke/TIA)                    | Pan 2019[112]  | 2  | IFG                          | WHO      | 6022 / na  | 1.64 (0.67; 4.01)        | 37.5 | 0.180 | na           |
| Stroke mortality (in patients with history of stroke/TIA)                    | Pan 2019[112]  | 2  | HbA <sub>1c</sub>            | ADA      | 828 / na   | 1.28 (0.30; 5.51)        | 81.4 | 0.917 | na           |
| MACE (in patients after PCI)                                                 | Zhao 2020[120] | 10 | IFG/IGT/ HbA <sub>1c</sub>   | ADA/WHO  | 6272 / na  | <b>1.41 (1.14; 1.75)</b> | 30.8 | 0.035 | 0.86; 2.32   |
| MACE (in patients after PCI)                                                 | Zhao 2020[120] | 2  | IGT                          | ADA/WHO  | 461 / na   | <b>1.62 (1.07; 2.46)</b> | 0    | 0.000 | na           |
| MACE (in patients after PCI)                                                 | Zhao 2020[120] | 3  | HbA <sub>1c</sub>            | ADA      | 3352 / na  | 1.38 (0.88; 2.17)        | 63   | 0.099 | 0.01; 196.94 |

### Microvascular outcomes

|                        |                             |   |                   |         |                  |                          |      |       |            |
|------------------------|-----------------------------|---|-------------------|---------|------------------|--------------------------|------|-------|------------|
| Chronic kidney disease | Echouffo-Tcheugui 2016[121] | 8 | IFG               | ADA/WHO | 170'081 / 15'259 | <b>1.10 (1.01; 1.20)</b> | 80.4 | 0.007 | 0.88; 1.39 |
| Chronic kidney disease | Echouffo-Tcheugui 2016[121] | 6 | IFG               | WHO     | 57'759 / 2445    | <b>1.25 (1.02; 1.53)</b> | 83.2 | 0.048 | 0.63; 2.45 |
| Chronic kidney disease | Mutie 2020[122]             | 4 | IFG               | ADA     | 137'483 / na     | 0.97 (0.94; 1.01)        | 0    | 0.000 | 0.89; 1.06 |
| Chronic kidney disease | Mutie 2020[122]             | 3 | HbA <sub>1c</sub> | ADA     | 19834 / na       | 1.07 (0.94; 1.21)        | 0    | 0.000 | 0.48; 2.38 |



| <b>Cancer</b>                    |                 |   |                            |          |                |                          |      |       |             |
|----------------------------------|-----------------|---|----------------------------|----------|----------------|--------------------------|------|-------|-------------|
| Total cancer                     | Huang 2014[123] | 5 | IFG                        | ADA/WHO  | 87'916 / na    | 1.13 (1.00; 1.28)        | 20.8 | 0.004 | 0.85; 1.51  |
| Total cancer                     | Huang 2014[123] | 4 | IFG                        | WHO      | 85'478 / na    | <b>1.11 (1.01; 1.22)</b> | 0    | 0.000 | 0.90; 1.37  |
| Total cancer                     | Huang 2014[123] | 6 | IGT                        | ADA/WHO  | 82'296 / na    | <b>1.25 (1.02; 1.53)</b> | 39.5 | 0.024 | 0.74; 2.09  |
| Total cancer                     | Huang 2014[123] | 2 | IFG / IGT                  | WHO      | 46'121 / na    | <b>1.11 (1.02; 1.21)</b> | 0    | 0.000 | na          |
| Stomach/colorectal cancer        | Huang 2014[123] | 3 | IFG / IGT                  | ADA/ WHO | 52'113 / na    | <b>1.55 (1.15; 2.09)</b> | 59.7 | 0.041 | 0.06; 39.06 |
| Liver cancer                     | Huang 2014[123] | 3 | IFG / IGT                  | ADA/WHO  | 53'971 / na    | <b>2.01 (1.45; 2.79)</b> | 0    | 0.000 | 0.24; 16.69 |
| Hepatocellular carcinoma         | Xu 2017[124]    | 5 | IFG / IGT                  | ADA/WHO  | 1'366'784 / na | <b>1.44 (1.09; 1.90)</b> | 40.8 | 0.038 | 0.67; 3.10  |
| Hepatocellular carcinoma         | Xu 2017[124]    | 3 | IFG                        | ADA      | 1'303'726 / na | <b>1.23 (1.03; 1.47)</b> | 14.8 | 0.009 | 0.23; 6.47  |
| Bronchus and lung cancer         | Huang 2014[123] | 2 | IFG / IGT                  | ADA/WHO  | 47'093 / na    | 1.35 (0.86; 2.11)        | 74.0 | 0.079 | na          |
| Prostate cancer                  | Huang 2014[123] | 3 | IFG / IGT                  | ADA/ WHO | 104'426 / na   | 1.19 (0.86; 1.65)        | 48.4 | 0.040 | 0.04; 32.97 |
| Kidney or bladder cancer         | Huang 2014[123] | 2 | IFG / IGT                  | ADA/ WHO | 99'406 / na    | 0.80 (0.55; 1.16)        | 0    | 0.000 | na          |
| Breast cancer                    | Huang 2014[123] | 4 | IFG / IGT                  | ADA/WHO  | 288'306 / na   | <b>1.19 (1.03; 1.38)</b> | 0    | 0.000 | 0.86; 1.64  |
| Breast cancer                    | Huang 2014[123] | 2 | IFG                        | WHO      | 235'757 / na   | 1.13 (0.95; 1.35)        | 0    | 0.000 | na          |
| Pancreatic cancer                | Fu 2016[125]    | 5 | IFG / IGT                  | ADA/WHO  | 1'809'891 / na | <b>1.22 (1.11; 1.34)</b> | 0    | 0.000 | 1.05; 1.35  |
| Pancreatic cancer                | Fu 2016[125]    | 3 | IFG                        | ADA      | 1'747'230 / na | <b>1.25 (1.12, 1.39)</b> | 17.6 | 0.002 | 0.50; 3.10  |
| <b>Mental/cognitive outcomes</b> |                 |   |                            |          |                |                          |      |       |             |
| Depressive symptoms              | Tong 2016[126]  | 4 | IFG/IGT/ HbA <sub>1c</sub> | ADA/WHO  | 14'660 / na    | 1.07 (0.80; 1.43)        | 73.1 | 0.056 | 0.32; 3.53  |
| Depressive symptoms              | Tong 2016[126]  | 2 | IFG                        | ADA      | 10'128 / na    | 0.91 (0.67; 1.23)        | 70.2 | 0.033 | na          |
| All-cause dementia <sup>c</sup>  | Xue 2019[113]   | 9 | IFG/IGT                    | na       | na / na        | <b>1.18 (1.02; 1.36)</b> | 22   | na    | na          |
| All-cause dementia <sup>c</sup>  | Xue 2019[113]   | ? | IFG                        | 5.6-6.9  | na / na        | <b>1.27 (1.08; 1.49)</b> | 0    | na    | na          |

|                                   |               |   |           |    |         |                          |      |    |    |
|-----------------------------------|---------------|---|-----------|----|---------|--------------------------|------|----|----|
| All-cause dementia <sup>c</sup>   | Xue 2019[113] | ? | IGT       | na | na / na | <b>1.40 (1.03; 1.91)</b> |      | na | na |
| Alzheimer's dementia <sup>c</sup> | Xue 2019[113] | 5 | IFG / IGT | na | na / na | <b>1.36 (1.09; 1.70)</b> | 14.0 | na | na |
| Vascular dementia <sup>c</sup>    | Xue 2019[113] | 3 | IFG / IGT | na | na / na | <b>1.47 (1.01; 2.15)</b> | 0    | na | na |
| Cognitive impairment <sup>c</sup> | Xue 2019[113] | 5 | IFG / IGT | na | na / na | 0.96 (0.85; 1.09)        | 0    | na | na |

na, not available; PI, prediction interval.

<sup>a</sup> total number of participants / cases as extracted from the meta-analyses, might include individuals with diabetes, because number of participants / cases was not always available for the prediabetes subgroup only

<sup>b</sup> poor outcomes defined as degree of disability or dependence in the daily activities of people who have suffered a stroke or other causes of neurological disability

<sup>c</sup> could not be recalculated because of missing information.

**Boldface** shows summary associations with precise 95% CIs, excluding the null value.

**ESM Table 5:** Important confounders considered in each primary study included in the meta-analyses

|                                     | Confounders |     |                        |                      |               |         |                      |                   |                                 |                               |                     |                                                                                                                                      |
|-------------------------------------|-------------|-----|------------------------|----------------------|---------------|---------|----------------------|-------------------|---------------------------------|-------------------------------|---------------------|--------------------------------------------------------------------------------------------------------------------------------------|
|                                     | Age         | Sex | Ethnicity <sup>a</sup> | Education/i<br>ncome | BMI/<br>waist | Smoking | Physical<br>activity | Alcohol<br>intake | Blood<br>pressure/<br>treatment | Blood<br>lipids/<br>treatment | Chronic<br>diseases | Further confounders                                                                                                                  |
| <b>All-cause mortality: IFG-ADA</b> |             |     |                        |                      |               |         |                      |                   |                                 |                               |                     |                                                                                                                                      |
| Yeboah, 2011                        | ✓           | ✓   | ✓                      |                      | ✓             | ✓       |                      |                   | ✓                               | ✓                             |                     |                                                                                                                                      |
| Deedwania, 2013                     | ✓           | ✓   | ✓                      | ✓                    | ✓             | ✓       | ✓                    | ✓                 | ✓                               | ✓                             | ✓                   | ankle arm index ratio, haemoglobin, albumin, uric acid, serum insulin, LV hypertrophy, atrial fibrillation, bundle branch block, CRP |
| Samaras, 2015                       | ✓           | ✓   |                        |                      | ✓             | ✓       |                      |                   | ✓                               |                               |                     |                                                                                                                                      |
| Jin, 2008                           | ✓           | ✓   |                        |                      | ✓             |         |                      |                   | ✓                               | ✓                             | ✓                   |                                                                                                                                      |
| Laukkanen, 2013                     | ✓           | ✓   |                        |                      | ✓             | ✓       |                      | ✓                 | ✓                               | ✓                             | ✓                   | family history of CHD                                                                                                                |
| Kim, 2016                           | ✓           | ✓   |                        |                      | ✓             | ✓       |                      |                   | ✓                               | ✓                             |                     | family history of CVD                                                                                                                |
| Rijkelijkhuizen, 2007               | ✓           | ✓   |                        |                      |               |         |                      |                   |                                 |                               |                     |                                                                                                                                      |
| Tang, 2019                          | ✓           | ✓   | ✓                      | ✓                    |               |         |                      |                   |                                 |                               |                     | family history of diabetes                                                                                                           |
| Lu, 2019                            | ✓           | ✓   |                        | ✓                    | ✓             | ✓       | ✓                    | ✓                 | ✓                               | ✓                             |                     | family history of diabetes                                                                                                           |
| Wen, 2005                           | ✓           | ✓   |                        |                      | ✓             | ✓       |                      |                   | ✓                               | ✓                             |                     |                                                                                                                                      |
| de Abreu, 2017                      | ✓           | ✓   |                        |                      |               | ✓       |                      |                   |                                 |                               |                     |                                                                                                                                      |
| Parizadeh, 2019                     | ✓           |     |                        | ✓                    | ✓             | ✓       |                      |                   | ✓                               | ✓                             | ✓                   | family history of diabetes, eGFR                                                                                                     |
| Rhee, 2020                          | ✓           | ✓   |                        |                      | ✓             | ✓       | ✓                    | ✓                 | ✓                               | ✓                             | ✓                   |                                                                                                                                      |
| Jiang, 2020                         | ✓           | ✓   |                        | ✓                    | ✓             | ✓       |                      |                   | ✓                               | ✓                             | ✓                   |                                                                                                                                      |
| Lazo-Porras, 2020                   | ✓           | ✓   |                        | ✓                    | ✓             | ✓       | ✓                    | ✓                 | ✓                               | ✓                             |                     | population group                                                                                                                     |
| Kim, 2017                           | ✓           | ✓   |                        | ✓                    | ✓             | ✓       | ✓                    | ✓                 | ✓                               | ✓                             |                     | antithrombotics                                                                                                                      |
| Mongraw-Chaffin, 2017               | ✓           | ✓   | ✓                      | ✓                    | ✓             | ✓       |                      |                   | ✓                               | ✓                             |                     | diabetes treatment                                                                                                                   |

|                                     | Confounders |     |                        |                      |               |         |                      |                   |                                 |                               |                     | Further confounders              |
|-------------------------------------|-------------|-----|------------------------|----------------------|---------------|---------|----------------------|-------------------|---------------------------------|-------------------------------|---------------------|----------------------------------|
|                                     | Age         | Sex | Ethnicity <sup>a</sup> | Education/i<br>ncome | BMI/<br>waist | Smoking | Physical<br>activity | Alcohol<br>intake | Blood<br>pressure/<br>treatment | Blood<br>lipids/<br>treatment | Chronic<br>diseases |                                  |
| Shi, 2016                           | ✓           | ✓   |                        | ✓                    | ✓             | ✓       | ✓                    | ✓                 | ✓                               |                               |                     | intake of energy, fat and fibre  |
| <b>All-cause mortality: IFG-WHO</b> |             |     |                        |                      |               |         |                      |                   |                                 |                               |                     |                                  |
| Lu, 2003                            | ✓           | ✓   |                        |                      | ✓             | ✓       | ✓                    | ✓                 | ✓                               | ✓                             |                     | study center                     |
| Nakagami, 2004                      | ✓           | ✓   |                        |                      | ✓             | ✓       |                      |                   | ✓                               | ✓                             |                     | cohort                           |
| Hunt, 2004                          | ✓           | ✓   | ✓                      |                      |               |         |                      |                   |                                 |                               |                     |                                  |
| Magliano, 2010                      |             | ✓   |                        | ✓                    | ✓             | ✓       |                      |                   | ✓                               | ✓                             | ✓                   |                                  |
| Saydah, 2001                        | ✓           | ✓   | ✓                      | ✓                    | ✓             | ✓       | ✓                    |                   | ✓                               | ✓                             |                     |                                  |
| DECODE, 2001                        | ✓           | ✓   |                        |                      | ✓             | ✓       |                      |                   | ✓                               | ✓                             |                     | center                           |
| Rodriguez, 2002                     | ✓           | ✓   |                        |                      | ✓             |         | ✓                    |                   | ✓                               | ✓                             |                     | fibrinogen                       |
| Tsai, 2008                          | ✓           | ✓   |                        |                      |               | ✓       |                      |                   |                                 |                               |                     |                                  |
| Wild, 2005                          | ✓           | ✓   |                        |                      |               | ✓       |                      |                   | ✓                               | ✓                             | ✓                   |                                  |
| Samaras, 2015                       | ✓           | ✓   |                        |                      | ✓             | ✓       |                      |                   | ✓                               |                               |                     |                                  |
| Henry, 2002                         | ✓           | ✓   |                        |                      | ✓             | ✓       |                      |                   | ✓                               | ✓                             |                     |                                  |
| Barr, 2007                          | ✓           | ✓   |                        |                      | ✓             | ✓       |                      |                   | ✓                               | ✓                             | ✓                   |                                  |
| Rijkelijkhuizen, 2007               | ✓           | ✓   |                        |                      |               |         |                      |                   |                                 |                               |                     |                                  |
| Wändell, 2005                       | ✓           | ✓   |                        |                      | ✓             |         |                      |                   | ✓                               |                               |                     |                                  |
| Parizadeh, 2019                     | ✓           |     |                        | ✓                    | ✓             | ✓       |                      |                   | ✓                               | ✓                             | ✓                   | family history of diabetes, eGFR |
| Lu, 2019                            | ✓           | ✓   |                        | ✓                    | ✓             | ✓       | ✓                    | ✓                 | ✓                               | ✓                             |                     | family history of diabetes       |
| Jiang, 2020                         | ✓           | ✓   |                        | ✓                    | ✓             | ✓       |                      |                   | ✓                               | ✓                             | ✓                   |                                  |

|                                          | Confounders |     |                        |                      |               |         |                      |                   |                                 |                               |                     |                                  |
|------------------------------------------|-------------|-----|------------------------|----------------------|---------------|---------|----------------------|-------------------|---------------------------------|-------------------------------|---------------------|----------------------------------|
|                                          | Age         | Sex | Ethnicity <sup>a</sup> | Education/i<br>ncome | BMI/<br>waist | Smoking | Physical<br>activity | Alcohol<br>intake | Blood<br>pressure/<br>treatment | Blood<br>lipids/<br>treatment | Chronic<br>diseases | Further confounders              |
| Warren, 2017                             | ✓           | ✓   | ✓                      | ✓                    | ✓             | ✓       |                      | ✓                 | ✓                               | ✓                             |                     | family history of diabetes, eGFR |
| Wen, 2005                                | ✓           | ✓   |                        |                      | ✓             | ✓       |                      |                   | ✓                               | ✓                             |                     |                                  |
| <b>All-cause mortality: IGT- ADA/WHO</b> |             |     |                        |                      |               |         |                      |                   |                                 |                               |                     |                                  |
| Saydah, 2001                             | ✓           | ✓   | ✓                      | ✓                    | ✓             | ✓       | ✓                    |                   | ✓                               | ✓                             |                     |                                  |
| Hiltunen, 2005                           | ✓           | ✓   |                        |                      | ✓             | ✓       | ✓                    |                   | ✓                               |                               | ✓                   | self-perceived health            |
| Rodriguez, 2002                          | ✓           | ✓   |                        |                      | ✓             |         | ✓                    |                   | ✓                               | ✓                             |                     | fibrinogen                       |
| Wild, 2005                               | ✓           | ✓   |                        |                      |               | ✓       |                      |                   | ✓                               | ✓                             | ✓                   |                                  |
| Stengard, 1992                           | ✓           | ✓   |                        |                      | ✓             | ✓       |                      |                   | ✓                               | ✓                             |                     | functional capacity              |
| Magliano, 2010                           |             | ✓   |                        | ✓                    | ✓             | ✓       |                      |                   | ✓                               | ✓                             | ✓                   |                                  |
| Nakagami, 2004                           | ✓           | ✓   |                        |                      | ✓             | ✓       |                      |                   | ✓                               | ✓                             |                     | cohort                           |
| Barr, 2007                               | ✓           | ✓   |                        |                      | ✓             | ✓       |                      |                   | ✓                               | ✓                             | ✓                   |                                  |
| DECODE, 2001                             | ✓           | ✓   |                        |                      | ✓             | ✓       |                      |                   | ✓                               | ✓                             |                     | center                           |
| Kokubo, 2010                             | ✓           | ✓   |                        |                      | ✓             | ✓       |                      | ✓                 | ✓                               | ✓                             |                     |                                  |
| Lu, 2019                                 | ✓           | ✓   |                        | ✓                    | ✓             | ✓       | ✓                    | ✓                 | ✓                               | ✓                             |                     | family history of diabetes       |
| Jiang, 2020                              | ✓           | ✓   |                        | ✓                    | ✓             | ✓       |                      |                   | ✓                               | ✓                             | ✓                   |                                  |
| Warren, 2017                             | ✓           | ✓   | ✓                      | ✓                    | ✓             | ✓       |                      | ✓                 | ✓                               | ✓                             |                     | family history of diabetes, eGFR |
| Parizadeh, 2019                          | ✓           |     |                        | ✓                    | ✓             | ✓       |                      |                   | ✓                               | ✓                             | ✓                   | family history of diabetes, eGFR |
| Fang, 2019                               | ✓           | ✓   |                        |                      | ✓             | ✓       |                      |                   | ✓                               | ✓                             | ✓                   | insulin resistance, eGFR         |
| <b>All-cause mortality: HbA1c-ADA</b>    |             |     |                        |                      |               |         |                      |                   |                                 |                               |                     |                                  |

|                                           | Confounders |     |                        |                      |               |         |                      |                   |                                 |                               |                     |                            |
|-------------------------------------------|-------------|-----|------------------------|----------------------|---------------|---------|----------------------|-------------------|---------------------------------|-------------------------------|---------------------|----------------------------|
|                                           | Age         | Sex | Ethnicity <sup>a</sup> | Education/i<br>ncome | BMI/<br>waist | Smoking | Physical<br>activity | Alcohol<br>intake | Blood<br>pressure/<br>treatment | Blood<br>lipids/<br>treatment | Chronic<br>diseases | Further confounders        |
| Gordon-Dseagu, 2015                       | ✓           | ✓   |                        | ✓                    | ✓             | ✓       |                      |                   |                                 |                               |                     |                            |
| Paprott, 2015                             | ✓           | ✓   |                        | ✓                    | ✓             | ✓       | ✓                    | ✓                 | ✓                               | ✓                             | ✓                   |                            |
| Kim, 2016                                 | ✓           | ✓   |                        |                      | ✓             | ✓       |                      |                   | ✓                               | ✓                             |                     | family history of CVD      |
| Jiang, 2020                               | ✓           | ✓   |                        | ✓                    | ✓             | ✓       |                      |                   | ✓                               | ✓                             | ✓                   |                            |
| Lu, 2019                                  | ✓           | ✓   |                        | ✓                    | ✓             | ✓       | ✓                    | ✓                 | ✓                               | ✓                             |                     | family history of diabetes |
| Tang, 2019                                | ✓           | ✓   | ✓                      | ✓                    |               |         |                      |                   |                                 |                               |                     | family history of diabetes |
| Lazo-Porras, 2020                         | ✓           | ✓   |                        | ✓                    | ✓             | ✓       | ✓                    | ✓                 | ✓                               | ✓                             |                     | population group           |
| <b>All-cause mortality: IGT/IFG - ADA</b> |             |     |                        |                      |               |         |                      |                   |                                 |                               |                     |                            |
| Hadaegh, 2015                             | ✓           | ✓   |                        |                      | ✓             | ✓       |                      |                   | ✓                               | ✓                             |                     |                            |
| Valdes, 2009                              | ✓           | ✓   |                        |                      | ✓             | ✓       |                      |                   | ✓                               | ✓                             | ✓                   |                            |
| <b>All-cause mortality: IGT/IFG - WHO</b> |             |     |                        |                      |               |         |                      |                   |                                 |                               |                     |                            |
| Saydah, 2001                              | ✓           | ✓   | ✓                      | ✓                    | ✓             | ✓       | ✓                    |                   | ✓                               | ✓                             |                     |                            |
| Rodriguez, 2002                           | ✓           | ✓   |                        |                      | ✓             |         | ✓                    |                   | ✓                               | ✓                             |                     | fibrinogen                 |
| Kowall, 2011                              | ✓           | ✓   |                        |                      | ✓             | ✓       | ✓                    | ✓                 | ✓                               | ✓                             | ✓                   | parental diabetes          |
| Evans, 2015                               | ✓           | ✓   |                        | ✓                    |               |         |                      |                   |                                 |                               |                     |                            |
| Hu, 2003                                  | ✓           | ✓   |                        |                      | ✓             | ✓       |                      |                   | ✓                               | ✓                             |                     | center                     |
| Nakagami, 2004                            | ✓           | ✓   |                        |                      | ✓             | ✓       |                      |                   | ✓                               | ✓                             |                     | cohort                     |
| Ma, 2003                                  | ✓           | ✓   |                        | ✓                    | ✓             | ✓       |                      | ✓                 | ✓                               |                               |                     |                            |
| Valdes, 2009                              | ✓           | ✓   |                        |                      | ✓             | ✓       |                      |                   | ✓                               | ✓                             | ✓                   |                            |

|                                                                                               | Confounders |     |                        |                      |               |         |                      |                   |                                 |                               |                     |                                                                         |
|-----------------------------------------------------------------------------------------------|-------------|-----|------------------------|----------------------|---------------|---------|----------------------|-------------------|---------------------------------|-------------------------------|---------------------|-------------------------------------------------------------------------|
|                                                                                               | Age         | Sex | Ethnicity <sup>a</sup> | Education/i<br>ncome | BMI/<br>waist | Smoking | Physical<br>activity | Alcohol<br>intake | Blood<br>pressure/<br>treatment | Blood<br>lipids/<br>treatment | Chronic<br>diseases | Further confounders                                                     |
| <b>All-cause mortality: IGF/HbA1c-ADA</b>                                                     |             |     |                        |                      |               |         |                      |                   |                                 |                               |                     |                                                                         |
| Tang, 2019                                                                                    | ✓           | ✓   | ✓                      | ✓                    |               |         |                      |                   |                                 |                               |                     | family history of diabetes                                              |
| Hubbard, 2019                                                                                 | ✓           | ✓   |                        | ✓                    | ✓             | ✓       | ✓                    |                   |                                 | ✓                             | ✓                   | aspirin use                                                             |
| Rhee, 2016                                                                                    | ✓           | ✓   |                        |                      | ✓             | ✓       | ✓                    | ✓                 | ✓                               |                               | ✓                   | study center, year of screening examination, family history of diabetes |
| Kim, 2016                                                                                     | ✓           | ✓   |                        |                      | ✓             | ✓       |                      |                   | ✓                               | ✓                             |                     | family history of CVD                                                   |
| <b>Long-term all-cause mortality (in patients after PCI): HbA1c-ADA</b>                       |             |     |                        |                      |               |         |                      |                   |                                 |                               |                     |                                                                         |
| Naito, 2014                                                                                   | ✓           |     |                        |                      | ✓             |         |                      |                   |                                 | ✓                             |                     | LVEF, haemoglobin, eGFR, multivessel disease                            |
| Shin, 2016                                                                                    | ✓           | ✓   |                        |                      | ✓             |         |                      |                   |                                 | ✓                             |                     | LVEF, Killip class, troponin I                                          |
| Aggarwal, 2016                                                                                | ✓           | ✓   |                        |                      |               |         |                      |                   |                                 |                               |                     |                                                                         |
| <b>Short-term all-cause mortality (in patients after PCI): HbA1c-ADA</b>                      |             |     |                        |                      |               |         |                      |                   |                                 |                               |                     |                                                                         |
| Aggarwal, 2016                                                                                | ✓           | ✓   |                        |                      |               |         |                      |                   |                                 |                               |                     |                                                                         |
| Shin, 2016                                                                                    | ✓           | ✓   |                        |                      | ✓             |         |                      |                   |                                 | ✓                             |                     | LVEF, Killip class, troponin I                                          |
| <b>All-cause mortality (in patients with atherosclerotic cardiovascular disease): IFG-ADA</b> |             |     |                        |                      |               |         |                      |                   |                                 |                               |                     |                                                                         |
| Janszky, 2009                                                                                 | ✓           | ✓   |                        | ✓                    | ✓             |         | ✓                    |                   | ✓                               | ✓                             | ✓                   | apo B/apo A ratio, Q wave infarction and education                      |
| Silbernagel, 2011                                                                             | ✓           | ✓   |                        |                      | ✓             | ✓       |                      |                   | ✓                               | ✓                             | ✓                   | eGFR, Friesinger score, glycated hemoglobin                             |
| Ding, 2014                                                                                    | ✓           | ✓   |                        | ✓                    | ✓             | ✓       | ✓                    | ✓                 | ✓                               | ✓                             | ✓                   | marriage, glomerular filtration rate, antiplatelet drugs                |
| Slezak, 2018                                                                                  | ✓           | ✓   |                        |                      | ✓             | ✓       |                      |                   | ✓                               | ✓                             |                     | survey                                                                  |
| Fefer, 2008                                                                                   | ✓           | ✓   |                        |                      |               |         |                      |                   |                                 |                               | ✓                   | Killip class, LVEF                                                      |
| <b>All-cause mortality (in patients with atherosclerotic cardiovascular disease): IFG-WHO</b> |             |     |                        |                      |               |         |                      |                   |                                 |                               |                     |                                                                         |
| Fisman, 2001                                                                                  | ✓           | ✓   |                        |                      | ✓             | ✓       |                      |                   |                                 | ✓                             | ✓                   | functional class, peripheral vascular disease, anginal syndrome         |

|                                                                                                   | Confounders |     |                        |                      |               |         |                      |                   |                                 |                               |                     | Further confounders                                                                                                                                                         |
|---------------------------------------------------------------------------------------------------|-------------|-----|------------------------|----------------------|---------------|---------|----------------------|-------------------|---------------------------------|-------------------------------|---------------------|-----------------------------------------------------------------------------------------------------------------------------------------------------------------------------|
|                                                                                                   | Age         | Sex | Ethnicity <sup>a</sup> | Education/i<br>ncome | BMI/<br>waist | Smoking | Physical<br>activity | Alcohol<br>intake | Blood<br>pressure/<br>treatment | Blood<br>lipids/<br>treatment | Chronic<br>diseases |                                                                                                                                                                             |
| Muhlestein, 2003                                                                                  | ✓           | ✓   |                        |                      |               | ✓       |                      |                   | ✓                               | ✓                             | ✓                   | type of PCI, LVEF, family history, glycemic status                                                                                                                          |
| Nigam, 2007                                                                                       | ✓           | ✓   |                        |                      | ✓             | ✓       |                      |                   | ✓                               | ✓                             | ✓                   |                                                                                                                                                                             |
| Giraldez, 2013                                                                                    | ✓           | ✓   |                        |                      | ✓             | ✓       |                      |                   | ✓                               |                               | ✓                   | ST-segment changes on qualifying event ECG, white blood cell count, Killip class, creatinine clearance, heart rate, positive baseline troponin,                             |
| Kiviniemi, 2019                                                                                   | ✓           | ✓   |                        |                      | ✓             |         |                      |                   | ✓                               |                               |                     | grading for angina pectoris, SYNTAX Score, and LVEF                                                                                                                         |
| <b>All-cause mortality (in patients with atherosclerotic cardiovascular disease): IGT-ADA/WHO</b> |             |     |                        |                      |               |         |                      |                   |                                 |                               |                     |                                                                                                                                                                             |
| Ding, 2014                                                                                        | ✓           | ✓   |                        | ✓                    | ✓             | ✓       | ✓                    | ✓                 | ✓                               | ✓                             | ✓                   | marriage, glomerular filtration rate, antiplatelet drugs                                                                                                                    |
| George, 2015                                                                                      | ✓           | ✓   |                        |                      |               | ✓       |                      |                   | ✓                               | ✓                             | ✓                   | discharge diagnosis                                                                                                                                                         |
| Kiviniemi, 2019                                                                                   | ✓           | ✓   |                        |                      | ✓             |         |                      |                   | ✓                               |                               |                     | grading for angina pectoris, SYNTAX Score, and LVEF                                                                                                                         |
| <b>All-cause mortality (in patients with atherosclerotic cardiovascular disease): HbA1c-ADA</b>   |             |     |                        |                      |               |         |                      |                   |                                 |                               |                     |                                                                                                                                                                             |
| Shin, 2016                                                                                        | ✓           | ✓   |                        |                      | ✓             | ✓       |                      |                   | ✓                               | ✓                             | ✓                   | Killip class, LVEF, peak troponin I, serum creatinine, peak creatine kinase 2 isoenzyme, treated vessel, lesion type, PCI, CRP                                              |
| Choi, 2018                                                                                        | ✓           | ✓   |                        |                      |               | ✓       |                      |                   | ✓                               | ✓                             | ✓                   | bifurcation Lesion                                                                                                                                                          |
| <b>All-cause mortality (in patients with atherosclerotic cardiovascular disease): IFG/IGT-ADA</b> |             |     |                        |                      |               |         |                      |                   |                                 |                               |                     |                                                                                                                                                                             |
| Hofsten, 2009                                                                                     | ✓           | ✓   |                        |                      |               |         |                      |                   |                                 |                               | ✓                   | Killip class II, LVEF, E/e=, EDT 140 ms, left atrial volume index>32 ml/m <sup>2</sup> , NT-proBNP                                                                          |
| Ding, 2014                                                                                        | ✓           | ✓   |                        | ✓                    | ✓             | ✓       | ✓                    | ✓                 | ✓                               | ✓                             | ✓                   | marriage, glomerular filtration rate, antiplatelet drugs                                                                                                                    |
| <b>All-cause mortality (in patients with atherosclerotic cardiovascular disease): IFG/IGT-WHO</b> |             |     |                        |                      |               |         |                      |                   |                                 |                               |                     |                                                                                                                                                                             |
| Lenzen, 2006                                                                                      | ✓           | ✓   |                        |                      |               |         |                      |                   |                                 | ✓                             | ✓                   |                                                                                                                                                                             |
| Pararajasingam, 2016                                                                              | ✓           | ✓   |                        |                      | ✓             | ✓       |                      |                   | ✓                               | ✓                             | ✓                   | wall motion score index, PCI at admission, CABG at admission, PCI and CABG at admission, only reperfusion therapy at admission, CABG during follow-up, PCI during follow-up |



|                           | Confounders |     |                        |                      |               |         |                      |                   |                                 |                               |                     | Further confounders                                                                                                                  |
|---------------------------|-------------|-----|------------------------|----------------------|---------------|---------|----------------------|-------------------|---------------------------------|-------------------------------|---------------------|--------------------------------------------------------------------------------------------------------------------------------------|
|                           | Age         | Sex | Ethnicity <sup>a</sup> | Education/i<br>ncome | BMI/<br>waist | Smoking | Physical<br>activity | Alcohol<br>intake | Blood<br>pressure/<br>treatment | Blood<br>lipids/<br>treatment | Chronic<br>diseases |                                                                                                                                      |
| Pararajasingam, 2019      | ✓           | ✓   |                        |                      |               |         |                      |                   |                                 |                               |                     | type of MI                                                                                                                           |
| <b>CV events: IFG-ADA</b> |             |     |                        |                      |               |         |                      |                   |                                 |                               |                     |                                                                                                                                      |
| Khang, 2010               | ✓           | ✓   |                        |                      | ✓             |         |                      |                   | ✓                               | ✓                             |                     |                                                                                                                                      |
| Deedwania, 2013           | ✓           | ✓   | ✓                      | ✓                    | ✓             | ✓       | ✓                    | ✓                 | ✓                               | ✓                             | ✓                   | ankle arm index ratio, haemoglobin, albumin, uric acid, serum insulin, LV hypertrophy, atrial fibrillation, bundle branch block, CRP |
| Kim, 2013                 | ✓           |     |                        |                      | ✓             | ✓       |                      |                   | ✓                               | ✓                             |                     | family history of CVD                                                                                                                |
| Ma, 2012                  | ✓           | ✓   |                        | ✓                    | ✓             |         |                      | ✓                 | ✓                               |                               |                     |                                                                                                                                      |
| Kim, 2016                 | ✓           | ✓   |                        |                      | ✓             | ✓       |                      |                   | ✓                               | ✓                             |                     | family history of CVD                                                                                                                |
| Schöttker, 2013           | ✓           | ✓   |                        |                      |               | ✓       |                      |                   | ✓                               | ✓                             |                     |                                                                                                                                      |
| Yeboah, 2011              | ✓           | ✓   | ✓                      |                      | ✓             | ✓       |                      |                   | ✓                               | ✓                             |                     |                                                                                                                                      |
| Levitzky, 2008            | ✓           | ✓   |                        |                      | ✓             | ✓       |                      |                   | ✓                               | ✓                             |                     |                                                                                                                                      |
| Kokubo, 2010              | ✓           | ✓   |                        |                      | ✓             | ✓       |                      | ✓                 | ✓                               | ✓                             |                     |                                                                                                                                      |
| Wang, 2007a               | ✓           | ✓   |                        |                      |               | ✓       | ✓                    | ✓                 |                                 | ✓                             | ✓                   |                                                                                                                                      |
| Liu, 2007                 | ✓           | ✓   |                        |                      |               | ✓       |                      |                   |                                 | ✓                             |                     | CVD family history                                                                                                                   |
| Rijkelijkhuizen, 2007     | ✓           | ✓   |                        |                      |               |         |                      |                   |                                 |                               |                     |                                                                                                                                      |
| Laukkanen, 2013           | ✓           | ✓   |                        |                      | ✓             | ✓       |                      | ✓                 | ✓                               | ✓                             | ✓                   | family history of CHD                                                                                                                |
| Jin, 2008                 | ✓           | ✓   |                        |                      | ✓             |         |                      |                   | ✓                               | ✓                             | ✓                   |                                                                                                                                      |
| Tang, 2019                | ✓           | ✓   | ✓                      | ✓                    |               |         |                      |                   |                                 |                               |                     | family history of diabetes                                                                                                           |
| Vistisen, 2018            | ✓           | ✓   | ✓                      |                      |               | ✓       |                      |                   | ✓                               | ✓                             | ✓                   |                                                                                                                                      |
| Lu, 2019                  | ✓           | ✓   |                        | ✓                    | ✓             | ✓       | ✓                    | ✓                 | ✓                               | ✓                             |                     | family history of diabetes                                                                                                           |

|                           | Confounders |     |                        |                      |               |         |                      |                   |                                 |                               |                     |                                 |
|---------------------------|-------------|-----|------------------------|----------------------|---------------|---------|----------------------|-------------------|---------------------------------|-------------------------------|---------------------|---------------------------------|
|                           | Age         | Sex | Ethnicity <sup>a</sup> | Education/i<br>ncome | BMI/<br>waist | Smoking | Physical<br>activity | Alcohol<br>intake | Blood<br>pressure/<br>treatment | Blood<br>lipids/<br>treatment | Chronic<br>diseases | Further confounders             |
| Kim, 2017                 | ✓           | ✓   |                        | ✓                    | ✓             | ✓       | ✓                    | ✓                 | ✓                               | ✓                             |                     | antithrombotics                 |
| Jiang, 2020               | ✓           | ✓   |                        | ✓                    | ✓             | ✓       |                      |                   | ✓                               | ✓                             | ✓                   |                                 |
| Mongraw-Chaffin, 2017     | ✓           | ✓   | ✓                      | ✓                    | ✓             | ✓       |                      |                   | ✓                               | ✓                             |                     | diabetes treatment              |
| Wen, 2005                 | ✓           | ✓   |                        |                      | ✓             | ✓       |                      |                   | ✓                               | ✓                             |                     |                                 |
| Shi, 2016                 | ✓           | ✓   |                        | ✓                    | ✓             | ✓       | ✓                    | ✓                 | ✓                               |                               |                     | intake of energy, fat and fibre |
| <b>CV events: IFG-WHO</b> |             |     |                        |                      |               |         |                      |                   |                                 |                               |                     |                                 |
| Saydah, 2001              | ✓           | ✓   | ✓                      | ✓                    | ✓             | ✓       | ✓                    |                   | ✓                               | ✓                             |                     |                                 |
| Lu, 2003                  | ✓           | ✓   |                        |                      | ✓             | ✓       | ✓                    | ✓                 | ✓                               | ✓                             |                     | study center                    |
| Rodriguez, 2002           | ✓           | ✓   |                        |                      | ✓             |         | ✓                    |                   | ✓                               | ✓                             |                     | fibrinogen                      |
| Oizumi, 2008              | ✓           | ✓   |                        |                      |               |         |                      |                   | ✓                               |                               |                     |                                 |
| Nakagami, 2004            | ✓           | ✓   |                        |                      | ✓             | ✓       |                      |                   | ✓                               | ✓                             |                     | cohort                          |
| Magliano, 2010            |             | ✓   |                        | ✓                    | ✓             | ✓       |                      |                   | ✓                               | ✓                             | ✓                   |                                 |
| Wild, 2005                | ✓           | ✓   |                        |                      |               | ✓       |                      |                   | ✓                               | ✓                             | ✓                   |                                 |
| DECODE, 2001              | ✓           | ✓   |                        |                      | ✓             | ✓       |                      |                   | ✓                               | ✓                             |                     | center                          |
| Nakanishi, 2004           | ✓           | ✓   |                        |                      | ✓             | ✓       |                      | ✓                 | ✓                               | ✓                             |                     | family history of T2D           |
| Wang, 2007a               | ✓           | ✓   |                        |                      |               | ✓       | ✓                    | ✓                 |                                 | ✓                             | ✓                   |                                 |
| Barzilay, 1999            | ✓           | ✓   | ✓                      |                      | ✓             | ✓       |                      |                   | ✓                               | ✓                             |                     |                                 |
| Nilsson, 2007             | ✓           | ✓   |                        |                      |               |         |                      |                   |                                 |                               |                     |                                 |
| Tsai, 2008                | ✓           | ✓   |                        |                      |               | ✓       |                      |                   |                                 |                               |                     |                                 |

|                               | Confounders |     |                        |                      |               |         |                      |                   |                                 |                               |                     |                                  |
|-------------------------------|-------------|-----|------------------------|----------------------|---------------|---------|----------------------|-------------------|---------------------------------|-------------------------------|---------------------|----------------------------------|
|                               | Age         | Sex | Ethnicity <sup>a</sup> | Education/i<br>ncome | BMI/<br>waist | Smoking | Physical<br>activity | Alcohol<br>intake | Blood<br>pressure/<br>treatment | Blood<br>lipids/<br>treatment | Chronic<br>diseases | Further confounders              |
| Henry, 2002                   | ✓           | ✓   |                        |                      | ✓             | ✓       |                      |                   | ✓                               | ✓                             |                     |                                  |
| Hunt, 2004                    | ✓           | ✓   | ✓                      |                      |               |         |                      |                   |                                 |                               |                     |                                  |
| Chien, 2008                   | ✓           | ✓   |                        | ✓                    | ✓             | ✓       | ✓                    | ✓                 |                                 |                               |                     | family history of CHD            |
| Rijkellokhuisen, 2007         | ✓           | ✓   |                        |                      |               |         |                      |                   |                                 |                               |                     |                                  |
| Barr, 2007                    | ✓           | ✓   |                        |                      | ✓             | ✓       |                      |                   | ✓                               | ✓                             | ✓                   |                                  |
| Wändell, 2005                 | ✓           | ✓   |                        |                      | ✓             |         |                      |                   | ✓                               |                               |                     |                                  |
| Vistisen, 2018                | ✓           | ✓   | ✓                      |                      |               | ✓       |                      |                   | ✓                               | ✓                             | ✓                   |                                  |
| Warren, 2017                  | ✓           | ✓   | ✓                      | ✓                    | ✓             | ✓       |                      | ✓                 | ✓                               | ✓                             |                     | family history of diabetes, eGFR |
| Lu, 2019                      | ✓           | ✓   |                        | ✓                    | ✓             | ✓       | ✓                    | ✓                 | ✓                               | ✓                             |                     | family history of diabetes       |
| Jiang, 2020                   | ✓           | ✓   |                        | ✓                    | ✓             | ✓       |                      |                   | ✓                               | ✓                             | ✓                   |                                  |
| Wen, 2005                     | ✓           | ✓   |                        |                      | ✓             | ✓       |                      |                   | ✓                               | ✓                             |                     |                                  |
| Onat, 2005                    | ✓           | ✓   |                        |                      |               | ✓       | ✓                    |                   |                                 |                               |                     |                                  |
| <b>CV events: IGT-WHO/ADA</b> |             |     |                        |                      |               |         |                      |                   |                                 |                               |                     |                                  |
| Saydah, 2001                  | ✓           | ✓   | ✓                      | ✓                    | ✓             | ✓       | ✓                    |                   | ✓                               | ✓                             |                     |                                  |
| Rodriguez, 2002               | ✓           | ✓   |                        |                      | ✓             |         | ✓                    |                   | ✓                               | ✓                             |                     | fibrinogen                       |
| Stengard, 1992                | ✓           | ✓   |                        |                      | ✓             | ✓       |                      |                   | ✓                               | ✓                             |                     | functional capacity              |
| Wild, 2005                    | ✓           | ✓   |                        |                      |               | ✓       |                      |                   | ✓                               | ✓                             | ✓                   |                                  |
| Barr, 2007                    | ✓           | ✓   |                        |                      | ✓             | ✓       |                      |                   | ✓                               | ✓                             | ✓                   |                                  |
| Chien, 2008                   | ✓           | ✓   |                        | ✓                    | ✓             | ✓       | ✓                    | ✓                 |                                 |                               |                     | family history of CHD            |

|                             | Confounders |     |                        |                      |               |         |                      |                   |                                 |                               |                     |                                  |
|-----------------------------|-------------|-----|------------------------|----------------------|---------------|---------|----------------------|-------------------|---------------------------------|-------------------------------|---------------------|----------------------------------|
|                             | Age         | Sex | Ethnicity <sup>a</sup> | Education/i<br>ncome | BMI/<br>waist | Smoking | Physical<br>activity | Alcohol<br>intake | Blood<br>pressure/<br>treatment | Blood<br>lipids/<br>treatment | Chronic<br>diseases | Further confounders              |
| Barzilay, 1999              | ✓           | ✓   | ✓                      |                      | ✓             | ✓       |                      |                   | ✓                               | ✓                             |                     |                                  |
| Magliano, 2010              |             | ✓   |                        | ✓                    | ✓             | ✓       |                      |                   | ✓                               | ✓                             | ✓                   |                                  |
| Nakagami, 2004              | ✓           | ✓   |                        |                      | ✓             | ✓       |                      |                   | ✓                               | ✓                             |                     | cohort                           |
| DECODE, 2001                | ✓           | ✓   |                        |                      | ✓             | ✓       |                      |                   | ✓                               | ✓                             |                     | center                           |
| Oizumi, 2008                | ✓           | ✓   |                        |                      |               |         |                      |                   | ✓                               |                               |                     |                                  |
| Wang, 2007a                 | ✓           | ✓   |                        |                      |               | ✓       | ✓                    | ✓                 |                                 | ✓                             | ✓                   |                                  |
| Tai, 2004                   | ✓           | ✓   | ✓                      |                      |               |         |                      |                   |                                 |                               |                     |                                  |
| Vistisen, 2018              | ✓           | ✓   | ✓                      |                      |               | ✓       |                      |                   | ✓                               | ✓                             | ✓                   |                                  |
| Warren, 2017                | ✓           | ✓   | ✓                      | ✓                    | ✓             | ✓       |                      | ✓                 | ✓                               | ✓                             |                     | family history of diabetes, eGFR |
| Lu, 2019                    | ✓           | ✓   |                        | ✓                    | ✓             | ✓       | ✓                    | ✓                 | ✓                               | ✓                             |                     | family history of diabetes       |
| Jiang, 2020                 | ✓           | ✓   |                        | ✓                    | ✓             | ✓       |                      |                   | ✓                               | ✓                             | ✓                   |                                  |
| Cederberg, 2010             |             | ✓   |                        |                      | ✓             | ✓       |                      |                   | ✓                               | ✓                             |                     | family history of diabetes       |
| Fang, 2019                  | ✓           | ✓   |                        |                      | ✓             | ✓       |                      |                   | ✓                               | ✓                             | ✓                   | insulin resistance, eGFR         |
| <b>CV events: HbA1c-ADA</b> |             |     |                        |                      |               |         |                      |                   |                                 |                               |                     |                                  |
| Schöttker, 2013             | ✓           | ✓   |                        |                      |               | ✓       |                      |                   | ✓                               | ✓                             |                     |                                  |
| Gordon-Dseagu, 2015         | ✓           | ✓   |                        | ✓                    | ✓             | ✓       |                      |                   |                                 |                               |                     |                                  |
| Kim, 2016                   | ✓           | ✓   |                        |                      | ✓             | ✓       |                      |                   | ✓                               | ✓                             |                     | family history of CVD            |
| Eastwood, 2015              | ✓           | ✓   |                        |                      | ✓             | ✓       |                      |                   | ✓                               | ✓                             |                     |                                  |
| Jiang, 2020                 | ✓           | ✓   |                        | ✓                    | ✓             | ✓       |                      |                   | ✓                               | ✓                             | ✓                   |                                  |

|                                 | Confounders |     |                        |                      |               |         |                      |                   |                                 |                               |                     |                                                                            |
|---------------------------------|-------------|-----|------------------------|----------------------|---------------|---------|----------------------|-------------------|---------------------------------|-------------------------------|---------------------|----------------------------------------------------------------------------|
|                                 | Age         | Sex | Ethnicity <sup>a</sup> | Education/i<br>ncome | BMI/<br>waist | Smoking | Physical<br>activity | Alcohol<br>intake | Blood<br>pressure/<br>treatment | Blood<br>lipids/<br>treatment | Chronic<br>diseases | Further confounders                                                        |
| Lu, 2019                        | ✓           | ✓   |                        | ✓                    | ✓             | ✓       | ✓                    | ✓                 | ✓                               | ✓                             |                     | family history of diabetes                                                 |
| Tang, 2019                      | ✓           | ✓   | ✓                      | ✓                    |               |         |                      |                   |                                 |                               |                     | family history of diabetes                                                 |
| Vistisen, 2018                  | ✓           | ✓   | ✓                      |                      |               | ✓       |                      |                   | ✓                               | ✓                             | ✓                   |                                                                            |
| <b>CV events: IFG/IGT-ADA</b>   |             |     |                        |                      |               |         |                      |                   |                                 |                               |                     |                                                                            |
| Hadaegh, 2015                   | ✓           | ✓   |                        |                      | ✓             | ✓       |                      |                   | ✓                               | ✓                             |                     |                                                                            |
| Tian, 2018                      | ✓           | ✓   |                        |                      | ✓             | ✓       | ✓                    | ✓                 | ✓                               |                               |                     | family history of diabetes                                                 |
| <b>CV events: IFG/IGT-WHO</b>   |             |     |                        |                      |               |         |                      |                   |                                 |                               |                     |                                                                            |
| Saydah, 2001                    | ✓           | ✓   | ✓                      | ✓                    | ✓             | ✓       | ✓                    |                   | ✓                               | ✓                             |                     |                                                                            |
| Rodriguez, 2002                 | ✓           | ✓   |                        |                      | ✓             |         | ✓                    |                   | ✓                               | ✓                             |                     | fibrinogen                                                                 |
| Kowall, 2011                    | ✓           | ✓   |                        |                      | ✓             | ✓       | ✓                    | ✓                 | ✓                               | ✓                             | ✓                   | parental diabetes                                                          |
| Evans, 2015                     | ✓           | ✓   |                        | ✓                    |               |         |                      |                   |                                 |                               |                     |                                                                            |
| Hu, 2003                        | ✓           | ✓   |                        |                      | ✓             | ✓       |                      |                   | ✓                               | ✓                             |                     | center                                                                     |
| Nakagami, 2004                  | ✓           | ✓   |                        |                      | ✓             | ✓       |                      |                   | ✓                               | ✓                             |                     | cohort                                                                     |
| Eastwood, 2015                  | ✓           | ✓   |                        |                      | ✓             | ✓       |                      |                   | ✓                               | ✓                             |                     |                                                                            |
| <b>CV events: IFG/HbA1c-ADA</b> |             |     |                        |                      |               |         |                      |                   |                                 |                               |                     |                                                                            |
| Tang, 2019                      | ✓           | ✓   | ✓                      | ✓                    |               |         |                      |                   |                                 |                               |                     | family history of diabetes                                                 |
| Hubbard, 2019                   | ✓           | ✓   |                        | ✓                    | ✓             | ✓       | ✓                    |                   |                                 | ✓                             | ✓                   | aspirin use                                                                |
| Rhee, 2016                      | ✓           | ✓   |                        |                      | ✓             | ✓       | ✓                    | ✓                 | ✓                               |                               | ✓                   | study center, year of screening<br>examination, family history of diabetes |
| Kim, 2016                       | ✓           | ✓   |                        |                      | ✓             | ✓       |                      |                   | ✓                               | ✓                             |                     | family history of CVD                                                      |

|                                                                                         | Confounders |     |                        |                      |               |         |                      |                   |                                 |                               |                     |                                                                                           |
|-----------------------------------------------------------------------------------------|-------------|-----|------------------------|----------------------|---------------|---------|----------------------|-------------------|---------------------------------|-------------------------------|---------------------|-------------------------------------------------------------------------------------------|
|                                                                                         | Age         | Sex | Ethnicity <sup>a</sup> | Education/i<br>ncome | BMI/<br>waist | Smoking | Physical<br>activity | Alcohol<br>intake | Blood<br>pressure/<br>treatment | Blood<br>lipids/<br>treatment | Chronic<br>diseases | Further confounders                                                                       |
| Schöttker, 2013                                                                         | ✓           | ✓   |                        |                      |               | ✓       |                      |                   | ✓                               | ✓                             |                     |                                                                                           |
| Vistisen, 2018                                                                          | ✓           | ✓   | ✓                      |                      |               | ✓       |                      |                   | ✓                               | ✓                             | ✓                   |                                                                                           |
| <b>CV events: IFG/HbA1c/IGT-ADA</b>                                                     |             |     |                        |                      |               |         |                      |                   |                                 |                               |                     |                                                                                           |
| Wang, 2019                                                                              | ✓           | ✓   |                        | ✓                    |               |         |                      |                   |                                 |                               | ✓                   | family history of diabetes                                                                |
| Ares, 2019                                                                              | ✓           | ✓   |                        |                      | ✓             | ✓       |                      |                   | ✓                               | ✓                             | ✓                   | eGFR                                                                                      |
| <b>CV events (in patients with atherosclerotic cardiovascular disease): IFG-ADA</b>     |             |     |                        |                      |               |         |                      |                   |                                 |                               |                     |                                                                                           |
| Kanaya, 2005                                                                            | ✓           | ✓   | ✓                      | ✓                    | ✓             | ✓       | ✓                    | ✓                 |                                 | ✓                             | ✓                   | overall health status, angiotensin-<br>converting enzyme inhibitor and hormone<br>therapy |
| Donahue, 2011                                                                           | ✓           |     |                        |                      | ✓             | ✓       |                      | ✓                 | ✓                               | ✓                             | ✓                   |                                                                                           |
| Janszky, 2009                                                                           | ✓           | ✓   |                        | ✓                    | ✓             |         | ✓                    |                   | ✓                               | ✓                             | ✓                   | apo B/apo A ratio, Q wave infarction and<br>education                                     |
| Silbernagel, 2011                                                                       | ✓           | ✓   |                        |                      | ✓             | ✓       |                      |                   | ✓                               | ✓                             | ✓                   | eGFR, Friesinger score, glycated<br>hemoglobin                                            |
| Ding, 2014                                                                              | ✓           | ✓   |                        | ✓                    | ✓             | ✓       | ✓                    | ✓                 | ✓                               | ✓                             | ✓                   | marriage, glomerular filtration rate,<br>antiplatelet drugs                               |
| Slezak, 2018                                                                            | ✓           | ✓   |                        |                      | ✓             | ✓       |                      |                   | ✓                               | ✓                             |                     | survey                                                                                    |
| <b>CV events (in patients with atherosclerotic cardiovascular disease): IFG-WHO</b>     |             |     |                        |                      |               |         |                      |                   |                                 |                               |                     |                                                                                           |
| Kiviniemi, 2019                                                                         | ✓           | ✓   |                        |                      | ✓             |         |                      |                   | ✓                               |                               |                     | grading for angina pectoris,<br>SYNTAX Score, and LVEF                                    |
| Shahim, 2017                                                                            | ✓           | ✓   |                        | ✓                    | ✓             | ✓       | ✓                    |                   | ✓                               | ✓                             |                     | HADS anxiety and depression score                                                         |
| Nigam, 2007                                                                             | ✓           | ✓   |                        |                      | ✓             | ✓       |                      |                   | ✓                               | ✓                             | ✓                   |                                                                                           |
| Tamita, 2012                                                                            | ✓           |     |                        |                      |               |         |                      |                   | ✓                               | ✓                             | ✓                   | Previous surgery, HbA1c, piuretics,                                                       |
| Held, 2005                                                                              | ✓           |     |                        |                      |               | ✓       |                      |                   | ✓                               | ✓                             | ✓                   |                                                                                           |
| <b>CV events (in patients with atherosclerotic cardiovascular disease): IGT-ADA/WHO</b> |             |     |                        |                      |               |         |                      |                   |                                 |                               |                     |                                                                                           |

|                                                                                               | Confounders |     |                        |                      |               |         |                      |                   |                                 |                               |                     | Further confounders                                                                                                            |
|-----------------------------------------------------------------------------------------------|-------------|-----|------------------------|----------------------|---------------|---------|----------------------|-------------------|---------------------------------|-------------------------------|---------------------|--------------------------------------------------------------------------------------------------------------------------------|
|                                                                                               | Age         | Sex | Ethnicity <sup>a</sup> | Education/i<br>ncome | BMI/<br>waist | Smoking | Physical<br>activity | Alcohol<br>intake | Blood<br>pressure/<br>treatment | Blood<br>lipids/<br>treatment | Chronic<br>diseases |                                                                                                                                |
| Kiviniemi, 2019                                                                               | ✓           | ✓   |                        |                      | ✓             |         |                      |                   | ✓                               |                               |                     | grading for angina pectoris, SYNTAX Score, and LVEF                                                                            |
| Shahim, 2017                                                                                  | ✓           | ✓   |                        | ✓                    | ✓             | ✓       | ✓                    |                   | ✓                               | ✓                             |                     | HADS anxiety and depression score                                                                                              |
| George, 2015                                                                                  | ✓           | ✓   |                        |                      |               | ✓       |                      |                   | ✓                               | ✓                             | ✓                   | discharge diagnosis                                                                                                            |
| Ding, 2014                                                                                    | ✓           | ✓   |                        | ✓                    | ✓             | ✓       | ✓                    | ✓                 | ✓                               | ✓                             | ✓                   | marriage, glomerular filtration rate, antiplatelet drugs                                                                       |
| Von Birgelen, 2018                                                                            | ✓           | ✓   |                        |                      |               |         |                      |                   |                                 | ✓                             | ✓                   |                                                                                                                                |
| Tamita, 2012                                                                                  | ✓           |     |                        |                      |               |         |                      |                   | ✓                               | ✓                             | ✓                   | Previous surgery, HbA1c, piuretics,                                                                                            |
| <b>CV events (in patients with atherosclerotic cardiovascular disease): HbA1c-ADA</b>         |             |     |                        |                      |               |         |                      |                   |                                 |                               |                     |                                                                                                                                |
| Shin, 2016                                                                                    | ✓           | ✓   |                        |                      | ✓             | ✓       |                      |                   | ✓                               | ✓                             | ✓                   | Killip class, LVEF, peak troponin I, serum creatinine, peak creatine kinase 2 isoenzyme, treated vessel, lesion type, PCI, CRP |
| Shahim, 2017                                                                                  | ✓           | ✓   |                        | ✓                    | ✓             | ✓       | ✓                    |                   | ✓                               | ✓                             |                     | HADS anxiety and depression score                                                                                              |
| Wang, 2020                                                                                    | ✓           | ✓   |                        |                      | ✓             |         |                      |                   | ✓                               | ✓                             | ✓                   | creatinine clearance rate                                                                                                      |
| Choi, 2018                                                                                    | ✓           | ✓   |                        |                      |               | ✓       |                      |                   | ✓                               | ✓                             | ✓                   | bifurcation Lesion                                                                                                             |
| <b>CV events (in patients with atherosclerotic cardiovascular disease): IFG/HbA1c-ADA</b>     |             |     |                        |                      |               |         |                      |                   |                                 |                               |                     |                                                                                                                                |
| Farhan, 2019                                                                                  | ✓           | ✓   |                        |                      |               |         |                      |                   |                                 |                               | ✓                   | minimal luminal area, prior PCI                                                                                                |
| Kim, 2020                                                                                     | ✓           | ✓   |                        |                      | ✓             | ✓       |                      |                   | ✓                               | ✓                             | ✓                   | PCI, CABG, CK-MB, NT-ProBNP, creatinine, eGFR, medicine, vessel disease, stent                                                 |
| <b>CV events (in patients with atherosclerotic cardiovascular disease): IFG/HbA1c/IGT-ADA</b> |             |     |                        |                      |               |         |                      |                   |                                 |                               |                     |                                                                                                                                |
| Jin, 2019                                                                                     | ✓           | ✓   |                        |                      | ✓             | ✓       |                      |                   | ✓                               | ✓                             | ✓                   | family history of CAD, gensini score, LVEF, creatinine, NT-proBNP, big ET-1, fffibrinogen                                      |
| Bjarnason, 2019                                                                               | ✓           | ✓   |                        |                      | ✓             | ✓       |                      |                   | ✓                               |                               | ✓                   |                                                                                                                                |
| <b>CV mortality: IFG-ADA</b>                                                                  |             |     |                        |                      |               |         |                      |                   |                                 |                               |                     |                                                                                                                                |

|                                                                                                                                                                | Confounders |     |                        |                      |               |         |                      |                   |                                 |                               |                     | Further confounders                                                                                                                  |
|----------------------------------------------------------------------------------------------------------------------------------------------------------------|-------------|-----|------------------------|----------------------|---------------|---------|----------------------|-------------------|---------------------------------|-------------------------------|---------------------|--------------------------------------------------------------------------------------------------------------------------------------|
|                                                                                                                                                                | Age         | Sex | Ethnicity <sup>a</sup> | Education/i<br>ncome | BMI/<br>waist | Smoking | Physical<br>activity | Alcohol<br>intake | Blood<br>pressure/<br>treatment | Blood<br>lipids/<br>treatment | Chronic<br>diseases |                                                                                                                                      |
| No information in the paper/meta-analysis which studies and confounders were included; no access to the supplement and authors did not reply to e-mail request |             |     |                        |                      |               |         |                      |                   |                                 |                               |                     |                                                                                                                                      |
| <b>CV mortality: IFG-WHO</b>                                                                                                                                   |             |     |                        |                      |               |         |                      |                   |                                 |                               |                     |                                                                                                                                      |
| No information in the paper/meta-analysis which studies and confounders were included; no access to the supplement and authors did not reply to e-mail request |             |     |                        |                      |               |         |                      |                   |                                 |                               |                     |                                                                                                                                      |
| <b>CV mortality: IGT-ADA/WHO</b>                                                                                                                               |             |     |                        |                      |               |         |                      |                   |                                 |                               |                     |                                                                                                                                      |
| No information in the paper/meta-analysis which studies and confounders were included; no access to the supplement and authors did not reply to e-mail request |             |     |                        |                      |               |         |                      |                   |                                 |                               |                     |                                                                                                                                      |
| <b>CVD incidence: IFG-ADA</b>                                                                                                                                  |             |     |                        |                      |               |         |                      |                   |                                 |                               |                     |                                                                                                                                      |
| No information in the paper/meta-analysis which studies and confounders were included; no access to the supplement and authors did not reply to e-mail request |             |     |                        |                      |               |         |                      |                   |                                 |                               |                     |                                                                                                                                      |
| <b>CVD incidence: IFG-WHO</b>                                                                                                                                  |             |     |                        |                      |               |         |                      |                   |                                 |                               |                     |                                                                                                                                      |
| No information in the paper/meta-analysis which studies and confounders were included; no access to the supplement and authors did not reply to e-mail request |             |     |                        |                      |               |         |                      |                   |                                 |                               |                     |                                                                                                                                      |
| <b>CVD incidence: IGT-ADA/WHO</b>                                                                                                                              |             |     |                        |                      |               |         |                      |                   |                                 |                               |                     |                                                                                                                                      |
| No information in the paper/meta-analysis which studies and confounders were included; no access to the supplement and authors did not reply to e-mail request |             |     |                        |                      |               |         |                      |                   |                                 |                               |                     |                                                                                                                                      |
| <b>CHD: IFG-ADA</b>                                                                                                                                            |             |     |                        |                      |               |         |                      |                   |                                 |                               |                     |                                                                                                                                      |
| Doi, 2010                                                                                                                                                      | ✓           | ✓   |                        |                      | ✓             | ✓       | ✓                    | ✓                 | ✓                               | ✓                             |                     | electrocardiogram abnormalities                                                                                                      |
| Kim, 2016                                                                                                                                                      | ✓           | ✓   |                        |                      | ✓             | ✓       |                      |                   | ✓                               | ✓                             |                     | family history of CVD                                                                                                                |
| Ma, 2012                                                                                                                                                       | ✓           | ✓   |                        | ✓                    | ✓             |         |                      | ✓                 | ✓                               |                               |                     |                                                                                                                                      |
| Kim, 2008                                                                                                                                                      | ✓           | ✓   |                        |                      |               |         |                      |                   |                                 |                               |                     |                                                                                                                                      |
| Deedwania, 2013                                                                                                                                                | ✓           | ✓   | ✓                      | ✓                    | ✓             | ✓       | ✓                    | ✓                 | ✓                               | ✓                             | ✓                   | ankle arm index ratio, haemoglobin, albumin, uric acid, serum insulin, LV hypertrophy, atrial fibrillation, bundle branch block, CRP |
| Yeboah, 2011                                                                                                                                                   | ✓           | ✓   | ✓                      |                      | ✓             | ✓       |                      |                   | ✓                               | ✓                             |                     |                                                                                                                                      |
| Kim, 2013                                                                                                                                                      | ✓           |     |                        |                      | ✓             | ✓       |                      |                   | ✓                               | ✓                             |                     | family history of CVD                                                                                                                |



|                       | Confounders |     |                        |                      |               |         |                      |                   |                                 |                               |                     |                                  |
|-----------------------|-------------|-----|------------------------|----------------------|---------------|---------|----------------------|-------------------|---------------------------------|-------------------------------|---------------------|----------------------------------|
|                       | Age         | Sex | Ethnicity <sup>a</sup> | Education/i<br>ncome | BMI/<br>waist | Smoking | Physical<br>activity | Alcohol<br>intake | Blood<br>pressure/<br>treatment | Blood<br>lipids/<br>treatment | Chronic<br>diseases | Further confounders              |
| Wang, 2007            | ✓           | ✓   |                        | ✓                    |               | ✓       |                      |                   |                                 | ✓                             |                     | family history of diabetes       |
| Samaras, 2015         | ✓           | ✓   |                        |                      | ✓             | ✓       |                      |                   | ✓                               |                               |                     |                                  |
| Selvin, 2013          | ✓           | ✓   | ✓                      | ✓                    | ✓             | ✓       | ✓                    | ✓                 | ✓                               | ✓                             |                     | family history of diabetes       |
| McNeill, 2006         | ✓           | ✓   | ✓                      |                      |               |         |                      |                   |                                 |                               |                     |                                  |
| Levitzky, 2008        | ✓           | ✓   |                        |                      | ✓             | ✓       |                      |                   | ✓                               | ✓                             |                     |                                  |
| Khang, 2010           | ✓           | ✓   |                        |                      | ✓             |         |                      |                   | ✓                               | ✓                             |                     |                                  |
| Tai, 2004             | ✓           | ✓   | ✓                      |                      |               |         |                      |                   |                                 |                               |                     |                                  |
| Liu, 2007             | ✓           | ✓   |                        |                      |               | ✓       |                      |                   |                                 | ✓                             |                     | CVD family history               |
| Kokubo, 2010          | ✓           | ✓   |                        |                      | ✓             | ✓       |                      | ✓                 | ✓                               | ✓                             |                     |                                  |
| Mathenge, 2020        | ✓           | ✓   | ✓                      | ✓                    | ✓             | ✓       | ✓                    |                   | ✓                               | ✓                             |                     | aspirin use, cognitive function  |
| Parizadeh, 2019       | ✓           |     |                        | ✓                    | ✓             | ✓       |                      |                   | ✓                               | ✓                             | ✓                   | family history of diabetes, eGFR |
| Kim, 2017             | ✓           | ✓   |                        | ✓                    | ✓             | ✓       | ✓                    | ✓                 | ✓                               | ✓                             |                     | antithrombotics                  |
| Ahn, 2018             | ✓           |     |                        |                      | ✓             | ✓       |                      |                   | ✓                               | ✓                             |                     |                                  |
| Mongraw-Chaffin, 2017 | ✓           | ✓   | ✓                      | ✓                    | ✓             | ✓       |                      |                   | ✓                               | ✓                             |                     | diabetes treatment               |
| Saito, 2011           | ✓           | ✓   |                        |                      | ✓             | ✓       | ✓                    | ✓                 | ✓                               | ✓                             |                     | community                        |
| <b>CHD: IFG-WHO</b>   |             |     |                        |                      |               |         |                      |                   |                                 |                               |                     |                                  |
| Oizumi, 2008          | ✓           | ✓   |                        |                      |               |         |                      |                   | ✓                               |                               |                     |                                  |
| Doi, 2010             | ✓           | ✓   |                        |                      | ✓             | ✓       | ✓                    | ✓                 | ✓                               | ✓                             |                     | electrocardiogram abnormalities  |
| Onat, 2013            | ✓           | ✓   |                        |                      | ✓             | ✓       |                      |                   | ✓                               | ✓                             |                     | CRP                              |

|                         | Confounders |     |                        |                      |               |         |                      |                   |                                 |                               |                     |                                  |
|-------------------------|-------------|-----|------------------------|----------------------|---------------|---------|----------------------|-------------------|---------------------------------|-------------------------------|---------------------|----------------------------------|
|                         | Age         | Sex | Ethnicity <sup>a</sup> | Education/i<br>ncome | BMI/<br>waist | Smoking | Physical<br>activity | Alcohol<br>intake | Blood<br>pressure/<br>treatment | Blood<br>lipids/<br>treatment | Chronic<br>diseases | Further confounders              |
| Palmieri, 2006          | ✓           | ✓   |                        |                      |               |         |                      |                   |                                 |                               |                     | center                           |
| DECODE, 2001            | ✓           | ✓   |                        |                      | ✓             | ✓       |                      |                   | ✓                               | ✓                             |                     | center                           |
| McNeill, 2005           | ✓           | ✓   |                        |                      | ✓             | ✓       | ✓                    |                   | ✓                               |                               | ✓                   | self-reported health             |
| Wannamethee, 2008       | ✓           | ✓   |                        | ✓                    |               | ✓       | ✓                    | ✓                 |                                 |                               |                     |                                  |
| Wang, 2007              | ✓           | ✓   |                        | ✓                    |               | ✓       |                      |                   |                                 | ✓                             |                     | family history of diabetes       |
| Levitzy, 2008           | ✓           | ✓   |                        |                      | ✓             | ✓       |                      |                   | ✓                               | ✓                             |                     |                                  |
| McNeill, 2006           | ✓           | ✓   | ✓                      |                      |               |         |                      |                   |                                 |                               |                     |                                  |
| Parizadeh, 2019         | ✓           |     |                        | ✓                    | ✓             | ✓       |                      |                   | ✓                               | ✓                             | ✓                   | family history of diabetes, eGFR |
| Brunner, 2010           | ✓           | ✓   |                        |                      |               |         |                      |                   |                                 |                               |                     |                                  |
| <b>CHD: IGT-ADA/WHO</b> |             |     |                        |                      |               |         |                      |                   |                                 |                               |                     |                                  |
| Pankow, 2007            | ✓           | ✓   | ✓                      |                      | ✓             | ✓       |                      |                   | ✓                               | ✓                             |                     |                                  |
| Doi, 2010               | ✓           | ✓   |                        |                      | ✓             | ✓       | ✓                    | ✓                 | ✓                               | ✓                             |                     | electrocardiogram abnormalities  |
| Wang, 2007              | ✓           | ✓   |                        | ✓                    |               | ✓       |                      |                   |                                 | ✓                             |                     | family history of diabetes       |
| Oizumi, 2008            | ✓           | ✓   |                        |                      |               |         |                      |                   | ✓                               |                               |                     |                                  |
| DECODE, 2001            | ✓           | ✓   |                        |                      | ✓             | ✓       |                      |                   | ✓                               | ✓                             |                     | center                           |
| Kim, 2008               | ✓           | ✓   |                        |                      |               |         |                      |                   |                                 |                               |                     |                                  |
| Tai, 2004               | ✓           | ✓   | ✓                      |                      |               |         |                      |                   |                                 |                               |                     |                                  |
| Onat, 2013              | ✓           | ✓   |                        |                      | ✓             | ✓       |                      |                   | ✓                               | ✓                             |                     | CRP                              |
| Fang, 2019              | ✓           | ✓   |                        |                      | ✓             | ✓       |                      |                   | ✓                               | ✓                             | ✓                   | insulin resistance, eGFR         |

|                                                                               | Confounders |     |                        |                      |               |         |                      |                   |                                 |                               |                     |                                                                                           |
|-------------------------------------------------------------------------------|-------------|-----|------------------------|----------------------|---------------|---------|----------------------|-------------------|---------------------------------|-------------------------------|---------------------|-------------------------------------------------------------------------------------------|
|                                                                               | Age         | Sex | Ethnicity <sup>a</sup> | Education/i<br>ncome | BMI/<br>waist | Smoking | Physical<br>activity | Alcohol<br>intake | Blood<br>pressure/<br>treatment | Blood<br>lipids/<br>treatment | Chronic<br>diseases | Further confounders                                                                       |
| Parizadeh, 2019                                                               | ✓           |     |                        | ✓                    | ✓             | ✓       |                      |                   | ✓                               | ✓                             | ✓                   | family history of diabetes, eGFR                                                          |
| Smith, 2002                                                                   | ✓           | ✓   | ✓                      |                      |               |         |                      |                   |                                 |                               |                     |                                                                                           |
| <b>CHD: HbA1c-ADA</b>                                                         |             |     |                        |                      |               |         |                      |                   |                                 |                               |                     |                                                                                           |
| Eastwood, 2015                                                                | ✓           | ✓   |                        |                      | ✓             | ✓       |                      |                   | ✓                               | ✓                             |                     |                                                                                           |
| Kim, 2016                                                                     | ✓           | ✓   |                        |                      | ✓             | ✓       |                      |                   | ✓                               | ✓                             |                     | family history of CVD                                                                     |
| Selvin, 2013                                                                  | ✓           | ✓   | ✓                      | ✓                    | ✓             | ✓       | ✓                    | ✓                 | ✓                               | ✓                             |                     | family history of diabetes                                                                |
| <b>CHD: IFG/IGT-WHO</b>                                                       |             |     |                        |                      |               |         |                      |                   |                                 |                               |                     |                                                                                           |
| Eastwood, 2015                                                                | ✓           | ✓   |                        |                      | ✓             | ✓       |                      |                   | ✓                               | ✓                             |                     |                                                                                           |
| Wang, 2007                                                                    | ✓           | ✓   |                        | ✓                    |               | ✓       |                      |                   |                                 | ✓                             |                     | family history of diabetes                                                                |
| Madssen, 2012                                                                 | ✓           | ✓   |                        |                      | ✓             | ✓       | ✓                    |                   | ✓                               |                               | ✓                   |                                                                                           |
| Doi, 2010                                                                     | ✓           | ✓   |                        |                      | ✓             | ✓       | ✓                    | ✓                 | ✓                               | ✓                             |                     | electrocardiogram abnormalities                                                           |
| Bonora, 2003                                                                  | ✓           | ✓   |                        | ✓                    |               | ✓       | ✓                    | ✓                 |                                 | ✓                             | ✓                   |                                                                                           |
| <b>CHD: IFG/HbA1c-ADA</b>                                                     |             |     |                        |                      |               |         |                      |                   |                                 |                               |                     |                                                                                           |
| Kim, 2016                                                                     | ✓           | ✓   |                        |                      | ✓             | ✓       |                      |                   | ✓                               | ✓                             |                     | family history of CVD                                                                     |
| Hubbard, 2019                                                                 | ✓           | ✓   |                        | ✓                    | ✓             | ✓       | ✓                    |                   |                                 | ✓                             | ✓                   | aspirin use                                                                               |
| <b>CHD (in patients with atherosclerotic cardiovascular disease): IFG-ADA</b> |             |     |                        |                      |               |         |                      |                   |                                 |                               |                     |                                                                                           |
| Kanaya, 2005                                                                  | ✓           | ✓   | ✓                      | ✓                    | ✓             | ✓       | ✓                    | ✓                 |                                 | ✓                             | ✓                   | overall health status, angiotensin-<br>converting enzyme inhibitor and hormone<br>therapy |
| Janszky, 2009                                                                 | ✓           | ✓   |                        | ✓                    | ✓             |         | ✓                    |                   | ✓                               | ✓                             | ✓                   | apo B/apo A ratio, Q wave infarction and<br>education                                     |
| <b>CHD (in patients with atherosclerotic cardiovascular disease): IFG-WHO</b> |             |     |                        |                      |               |         |                      |                   |                                 |                               |                     |                                                                                           |

|                                                                                   | Confounders |     |                        |                      |               |         |                      |                   |                                 |                               |                     | Further confounders                                                                                                                  |
|-----------------------------------------------------------------------------------|-------------|-----|------------------------|----------------------|---------------|---------|----------------------|-------------------|---------------------------------|-------------------------------|---------------------|--------------------------------------------------------------------------------------------------------------------------------------|
|                                                                                   | Age         | Sex | Ethnicity <sup>a</sup> | Education/i<br>ncome | BMI/<br>waist | Smoking | Physical<br>activity | Alcohol<br>intake | Blood<br>pressure/<br>treatment | Blood<br>lipids/<br>treatment | Chronic<br>diseases |                                                                                                                                      |
| Kiviniemi, 2019                                                                   | ✓           | ✓   |                        |                      | ✓             |         |                      |                   | ✓                               |                               |                     | grading for angina pectoris, SYNTAX Score, and LVEF                                                                                  |
| Fisman, 2001                                                                      | ✓           | ✓   |                        |                      | ✓             | ✓       |                      |                   |                                 | ✓                             | ✓                   | functional class, peripheral vascular disease, anginal syndrome                                                                      |
| <b>CHD (in patients with atherosclerotic cardiovascular disease): IGT-ADA/WHO</b> |             |     |                        |                      |               |         |                      |                   |                                 |                               |                     |                                                                                                                                      |
| Kiviniemi, 2019                                                                   | ✓           | ✓   |                        |                      | ✓             |         |                      |                   | ✓                               |                               |                     | grading for angina pectoris, SYNTAX Score, and LVEF                                                                                  |
| George, 2015                                                                      | ✓           | ✓   |                        |                      |               | ✓       |                      |                   | ✓                               | ✓                             | ✓                   | discharge diagnosis                                                                                                                  |
| Von Birgelen, 2018                                                                | ✓           | ✓   |                        |                      |               |         |                      |                   |                                 | ✓                             | ✓                   |                                                                                                                                      |
| <b>CHD (in patients with atherosclerotic cardiovascular disease): HbA1c-ADA</b>   |             |     |                        |                      |               |         |                      |                   |                                 |                               |                     |                                                                                                                                      |
| Shin, 2016                                                                        | ✓           | ✓   |                        |                      | ✓             | ✓       |                      |                   | ✓                               | ✓                             | ✓                   | Killip class, LVEF, peak troponin I, serum creatinine, peak creatine kinase 2 isoenzyme, treated vessel, lesion type, PCI, CRP       |
| Wang, 2020                                                                        | ✓           | ✓   |                        |                      | ✓             |         |                      |                   | ✓                               | ✓                             | ✓                   | creatinine clearance rate                                                                                                            |
| <b>Stroke: IFG-ADA</b>                                                            |             |     |                        |                      |               |         |                      |                   |                                 |                               |                     |                                                                                                                                      |
| Doi, 2010                                                                         | ✓           | ✓   |                        |                      | ✓             | ✓       | ✓                    | ✓                 | ✓                               | ✓                             |                     | electrocardiogram abnormalities                                                                                                      |
| Yeboah, 2011                                                                      | ✓           | ✓   | ✓                      |                      | ✓             | ✓       |                      |                   | ✓                               | ✓                             |                     |                                                                                                                                      |
| Deedwania, 2013                                                                   | ✓           | ✓   | ✓                      | ✓                    | ✓             | ✓       | ✓                    | ✓                 | ✓                               | ✓                             | ✓                   | ankle arm index ratio, haemoglobin, albumin, uric acid, serum insulin, LV hypertrophy, atrial fibrillation, bundle branch block, CRP |
| Khang, 2010                                                                       | ✓           | ✓   |                        |                      | ✓             |         |                      |                   | ✓                               | ✓                             |                     |                                                                                                                                      |
| Kim, 2016                                                                         | ✓           | ✓   |                        |                      | ✓             | ✓       |                      |                   | ✓                               | ✓                             |                     | family history of CVD                                                                                                                |
| Kim, 2013                                                                         | ✓           |     |                        |                      | ✓             | ✓       |                      |                   | ✓                               | ✓                             |                     | family history of CVD                                                                                                                |
| Ma, 2012                                                                          | ✓           | ✓   |                        | ✓                    | ✓             |         |                      | ✓                 | ✓                               |                               |                     |                                                                                                                                      |
| Sung, 2009                                                                        | ✓           | ✓   |                        | ✓                    | ✓             | ✓       | ✓                    | ✓                 | ✓                               | ✓                             |                     | height, area of residence                                                                                                            |

|                            | Confounders |     |                        |                      |               |         |                      |                   |                                 |                               |                     |                                                                         |
|----------------------------|-------------|-----|------------------------|----------------------|---------------|---------|----------------------|-------------------|---------------------------------|-------------------------------|---------------------|-------------------------------------------------------------------------|
|                            | Age         | Sex | Ethnicity <sup>a</sup> | Education/i<br>ncome | BMI/<br>waist | Smoking | Physical<br>activity | Alcohol<br>intake | Blood<br>pressure/<br>treatment | Blood<br>lipids/<br>treatment | Chronic<br>diseases | Further confounders                                                     |
| Kokubo, 2010               | ✓           | ✓   |                        |                      | ✓             | ✓       |                      | ✓                 | ✓                               | ✓                             |                     |                                                                         |
| Liu, 2007                  | ✓           | ✓   |                        |                      |               | ✓       |                      |                   |                                 | ✓                             |                     | CVD family history                                                      |
| Samaras, 2015              | ✓           | ✓   |                        |                      | ✓             | ✓       |                      |                   | ✓                               |                               |                     |                                                                         |
| Selvin, 2013               | ✓           | ✓   | ✓                      | ✓                    | ✓             | ✓       | ✓                    | ✓                 | ✓                               | ✓                             |                     | family history of diabetes                                              |
| Kim, 2017                  | ✓           | ✓   |                        | ✓                    | ✓             | ✓       | ✓                    | ✓                 | ✓                               | ✓                             |                     | antithrombotics                                                         |
| Mongraw-Chaffin, 2017      | ✓           | ✓   | ✓                      | ✓                    | ✓             | ✓       |                      |                   | ✓                               | ✓                             |                     | diabetes treatment                                                      |
| Wang, 2008                 | ✓           | ✓   |                        |                      | ✓             |         |                      |                   |                                 |                               |                     |                                                                         |
| Parizadeh, 2019            | ✓           |     |                        | ✓                    | ✓             | ✓       |                      |                   | ✓                               | ✓                             | ✓                   | family history of diabetes, eGFR                                        |
| <b>Stroke: IFG-WHO</b>     |             |     |                        |                      |               |         |                      |                   |                                 |                               |                     |                                                                         |
| Doi, 2010                  | ✓           | ✓   |                        |                      | ✓             | ✓       | ✓                    | ✓                 | ✓                               | ✓                             |                     | electrocardiogram abnormalities                                         |
| Oizumi, 2008               | ✓           | ✓   |                        |                      |               |         |                      |                   | ✓                               |                               |                     |                                                                         |
| Sung, 2009                 | ✓           | ✓   |                        | ✓                    | ✓             | ✓       | ✓                    | ✓                 | ✓                               | ✓                             |                     | height, area of residence                                               |
| Hyvärinen, 2009            | ✓           | ✓   |                        |                      | ✓             | ✓       |                      |                   | ✓                               | ✓                             |                     | center                                                                  |
| Sui, 2011                  | ✓           | ✓   |                        |                      | ✓             | ✓       |                      | ✓                 | ✓                               | ✓                             |                     | family history of CVD, abnormal ECG                                     |
| Mazza, 2001                | ✓           |     |                        |                      |               | ✓       |                      |                   | ✓                               |                               | ✓                   | atrial fibrillation, LV hypertrophy, uric acid, serum potassium, sodium |
| Wang, 2008                 | ✓           | ✓   |                        |                      | ✓             |         |                      |                   |                                 |                               |                     |                                                                         |
| Parizadeh, 2019            | ✓           |     |                        | ✓                    | ✓             | ✓       |                      |                   | ✓                               | ✓                             | ✓                   | family history of diabetes, eGFR                                        |
| <b>Stroke: IGT-ADA/WHO</b> |             |     |                        |                      |               |         |                      |                   |                                 |                               |                     |                                                                         |
| Doi, 2010                  | ✓           | ✓   |                        |                      | ✓             | ✓       | ✓                    | ✓                 | ✓                               | ✓                             |                     | electrocardiogram abnormalities                                         |

|                                                                                  | Confounders |     |                        |                      |               |         |                      |                   |                                 |                               |                     |                                                                                                                        |
|----------------------------------------------------------------------------------|-------------|-----|------------------------|----------------------|---------------|---------|----------------------|-------------------|---------------------------------|-------------------------------|---------------------|------------------------------------------------------------------------------------------------------------------------|
|                                                                                  | Age         | Sex | Ethnicity <sup>a</sup> | Education/i<br>ncome | BMI/<br>waist | Smoking | Physical<br>activity | Alcohol<br>intake | Blood<br>pressure/<br>treatment | Blood<br>lipids/<br>treatment | Chronic<br>diseases | Further confounders                                                                                                    |
| Hyvärinen, 2009                                                                  | ✓           | ✓   |                        |                      | ✓             | ✓       |                      |                   | ✓                               | ✓                             |                     | center                                                                                                                 |
| Kaarisalo, 2006                                                                  |             | ✓   |                        |                      |               | ✓       |                      |                   | ✓                               |                               | ✓                   | Previous stroke/TIA, perceived health status, cardiac failure, atrial fibrillation, claudication, acetylsalicylic acid |
| Oizumi, 2008                                                                     | ✓           | ✓   |                        |                      |               |         |                      |                   | ✓                               |                               |                     |                                                                                                                        |
| Parizadeh, 2019                                                                  | ✓           |     |                        | ✓                    | ✓             | ✓       |                      |                   | ✓                               | ✓                             | ✓                   | family history of diabetes, eGFR                                                                                       |
| Smith, 2002                                                                      | ✓           | ✓   | ✓                      |                      |               |         |                      |                   |                                 |                               |                     |                                                                                                                        |
| Wang, 2008                                                                       | ✓           | ✓   |                        |                      | ✓             |         |                      |                   |                                 |                               |                     |                                                                                                                        |
| Fang, 2019                                                                       | ✓           | ✓   |                        |                      | ✓             | ✓       |                      |                   | ✓                               | ✓                             | ✓                   | insulin resistance, eGFR                                                                                               |
| <b>Stroke: HbA1c-ADA</b>                                                         |             |     |                        |                      |               |         |                      |                   |                                 |                               |                     |                                                                                                                        |
| Selvin, 2013                                                                     | ✓           | ✓   | ✓                      | ✓                    | ✓             | ✓       | ✓                    | ✓                 | ✓                               | ✓                             |                     | family history of diabetes                                                                                             |
| Wang, 2011                                                                       | ✓           | ✓   |                        |                      |               | ✓       |                      |                   | ✓                               | ✓                             |                     | log urinary albumin:creatinine ratio, baseline FBG levels                                                              |
| Birkenhager-Gillesse, 2015                                                       |             | ✓   |                        | ✓                    | ✓             | ✓       |                      | ✓                 | ✓                               | ✓                             | ✓                   | living conditions, creatinine clearance, CRP                                                                           |
| Goto, 2015                                                                       | ✓           | ✓   |                        |                      | ✓             | ✓       | ✓                    | ✓                 | ✓                               | ✓                             |                     |                                                                                                                        |
| <b>Stroke: IFG/IGT-WHO</b>                                                       |             |     |                        |                      |               |         |                      |                   |                                 |                               |                     |                                                                                                                        |
| Eastwood, 2015                                                                   | ✓           | ✓   |                        |                      | ✓             | ✓       |                      |                   | ✓                               | ✓                             |                     |                                                                                                                        |
| Zhang, 2008                                                                      | ✓           | ✓   |                        |                      | ✓             | ✓       | ✓                    | ✓                 | ✓                               | ✓                             |                     | micro- and macro-albuminuria                                                                                           |
| <b>Stroke: IFG/HbA1c-ADA</b>                                                     |             |     |                        |                      |               |         |                      |                   |                                 |                               |                     |                                                                                                                        |
| Kim, 2016                                                                        | ✓           | ✓   |                        |                      | ✓             | ✓       |                      |                   | ✓                               | ✓                             |                     | family history of CVD                                                                                                  |
| Hubbard, 2019                                                                    | ✓           | ✓   |                        | ✓                    | ✓             | ✓       | ✓                    |                   |                                 | ✓                             | ✓                   | aspirin use                                                                                                            |
| <b>Stroke (in patients with atherosclerotic cardiovascular disease): IFG-ADA</b> |             |     |                        |                      |               |         |                      |                   |                                 |                               |                     |                                                                                                                        |

|                                         | Confounders |     |                        |                      |               |         |                      |                   |                                 |                               |                     | Further confounders                                                                                                                           |
|-----------------------------------------|-------------|-----|------------------------|----------------------|---------------|---------|----------------------|-------------------|---------------------------------|-------------------------------|---------------------|-----------------------------------------------------------------------------------------------------------------------------------------------|
|                                         | Age         | Sex | Ethnicity <sup>a</sup> | Education/i<br>ncome | BMI/<br>waist | Smoking | Physical<br>activity | Alcohol<br>intake | Blood<br>pressure/<br>treatment | Blood<br>lipids/<br>treatment | Chronic<br>diseases |                                                                                                                                               |
| Kanaya, 2005                            | ✓           | ✓   | ✓                      | ✓                    | ✓             | ✓       | ✓                    | ✓                 |                                 | ✓                             | ✓                   | overall health status, angiotensin-<br>converting enzyme inhibitor and hormone<br>therapy                                                     |
| Janszky, 2009                           | ✓           | ✓   |                        | ✓                    | ✓             |         | ✓                    |                   | ✓                               | ✓                             | ✓                   | apo B/apo A ratio, Q wave infarction and<br>education                                                                                         |
| <b>Atrial fibrillation: IFG-ADA/WHO</b> |             |     |                        |                      |               |         |                      |                   |                                 |                               |                     |                                                                                                                                               |
| Kokubo, 2017                            | ✓           | ✓   |                        |                      |               |         |                      |                   |                                 |                               |                     |                                                                                                                                               |
| Lee, 2017                               | ✓           | ✓   |                        |                      |               | ✓       |                      | ✓                 |                                 |                               | ✓                   |                                                                                                                                               |
| Huxley, 2011                            | ✓           | ✓   | ✓                      | ✓                    | ✓             | ✓       |                      |                   | ✓                               |                               |                     | height                                                                                                                                        |
| <b>Atrial fibrillation: IFG-ADA</b>     |             |     |                        |                      |               |         |                      |                   |                                 |                               |                     |                                                                                                                                               |
| Kokubo, 2017                            | ✓           | ✓   |                        |                      |               |         |                      |                   |                                 |                               |                     |                                                                                                                                               |
| Lee, 2017                               | ✓           | ✓   |                        |                      |               | ✓       |                      | ✓                 |                                 |                               | ✓                   |                                                                                                                                               |
| Huxley, 2011                            | ✓           | ✓   | ✓                      | ✓                    | ✓             | ✓       |                      |                   | ✓                               |                               |                     | height                                                                                                                                        |
| <b>Heart failure: IFG-ADA</b>           |             |     |                        |                      |               |         |                      |                   |                                 |                               |                     |                                                                                                                                               |
| Janszky, 2009                           | ✓           | ✓   |                        | ✓                    | ✓             |         | ✓                    |                   | ✓                               | ✓                             | ✓                   | apo B/apo A ratio, Q wave infarction and<br>education                                                                                         |
| Wang, 2010                              | ✓           | ✓   |                        |                      |               | ✓       | ✓                    | ✓                 | ✓                               | ✓                             | ✓                   |                                                                                                                                               |
| Nichols, 2009                           | ✓           | ✓   |                        |                      | ✓             | ✓       |                      |                   | ✓                               | ✓                             | ✓                   | eGFR,                                                                                                                                         |
| Mongraw-Chaffin, 2017                   | ✓           |     | ✓                      | ✓                    | ✓             | ✓       |                      |                   | ✓                               | ✓                             |                     |                                                                                                                                               |
| Deedwania, 2013                         | ✓           | ✓   | ✓                      | ✓                    | ✓             | ✓       | ✓                    | ✓                 | ✓                               | ✓                             | ✓                   | ankle arm index ratio, haemoglobin,<br>albumin, uric acid, serum insulin, LV<br>hypertrophy, atrial fibrillation, bundle<br>branch block, CRP |
| Kanaya, 2005                            | ✓           | ✓   | ✓                      | ✓                    | ✓             | ✓       | ✓                    | ✓                 |                                 | ✓                             | ✓                   | overall health status, angiotensin-<br>converting enzyme inhibitor and hormone<br>therapy                                                     |
| Held, 2007                              | ✓           | ✓   |                        |                      | ✓             | ✓       |                      |                   | ✓                               | ✓                             | ✓                   | creatinine                                                                                                                                    |
| Matsushita, 2010                        | ✓           | ✓   | ✓                      | ✓                    | ✓             | ✓       |                      | ✓                 | ✓                               | ✓                             | ✓                   | eGFR, FPG, HbA1c                                                                                                                              |

|                                                                    | Confounders |     |                        |                      |               |         |                      |                   |                                 |                               |                     | Further confounders                                                                                                               |
|--------------------------------------------------------------------|-------------|-----|------------------------|----------------------|---------------|---------|----------------------|-------------------|---------------------------------|-------------------------------|---------------------|-----------------------------------------------------------------------------------------------------------------------------------|
|                                                                    | Age         | Sex | Ethnicity <sup>a</sup> | Education/i<br>ncome | BMI/<br>waist | Smoking | Physical<br>activity | Alcohol<br>intake | Blood<br>pressure/<br>treatment | Blood<br>lipids/<br>treatment | Chronic<br>diseases |                                                                                                                                   |
| Voulgari, 2011                                                     | ✓           | ✓   |                        |                      |               | ✓       | ✓                    |                   | ✓                               | ✓                             | ✓                   | function on echocardiography                                                                                                      |
| Rhee, 2020                                                         | ✓           | ✓   |                        | ✓                    |               | ✓       | ✓                    | ✓                 | ✓                               | ✓                             | ✓                   | duration of diabetes                                                                                                              |
| <b>Heart failure: IFG-WHO</b>                                      |             |     |                        |                      |               |         |                      |                   |                                 |                               |                     |                                                                                                                                   |
| Kanaya, 2005                                                       | ✓           | ✓   | ✓                      | ✓                    | ✓             | ✓       | ✓                    | ✓                 |                                 | ✓                             | ✓                   | overall health status, angiotensin-converting enzyme inhibitor and hormone therapy                                                |
| Kiviniemi, 2019                                                    | ✓           | ✓   |                        |                      | ✓             |         |                      |                   | ✓                               |                               |                     | grading for angina pectoris, SYNTAX Score, and LVEF                                                                               |
| Matsushita, 2010                                                   | ✓           | ✓   | ✓                      | ✓                    | ✓             | ✓       |                      | ✓                 | ✓                               | ✓                             | ✓                   | eGFR, FPG, HbA1c                                                                                                                  |
| Nichols, 2009                                                      | ✓           | ✓   |                        |                      | ✓             | ✓       |                      |                   | ✓                               | ✓                             | ✓                   | eGFR,                                                                                                                             |
| Bibbins-Domingo, 2004                                              | ✓           | ✓   |                        |                      | ✓             | ✓       |                      |                   | ✓                               | ✓                             | ✓                   | creatinine clearance, left bundle-branch block                                                                                    |
| Wang, 2010                                                         | ✓           |     |                        |                      |               | ✓       | ✓                    | ✓                 | ✓                               | ✓                             | ✓                   |                                                                                                                                   |
| <b>Heart failure: IGT-ADA/WHO</b>                                  |             |     |                        |                      |               |         |                      |                   |                                 |                               |                     |                                                                                                                                   |
| Wang, 2010                                                         | ✓           |     |                        |                      |               | ✓       | ✓                    | ✓                 | ✓                               | ✓                             | ✓                   |                                                                                                                                   |
| Kiviniemi, 2019                                                    | ✓           | ✓   |                        |                      | ✓             |         |                      |                   | ✓                               |                               |                     | grading for angina pectoris, SYNTAX Score, and LVEF                                                                               |
| Fang, 2019                                                         | ✓           | ✓   |                        |                      | ✓             | ✓       |                      |                   | ✓                               | ✓                             | ✓                   | insulin resistance, eGFR,                                                                                                         |
| <b>Sudden cardiac death: IFG/IGT-ADA</b>                           |             |     |                        |                      |               |         |                      |                   |                                 |                               |                     |                                                                                                                                   |
| Khosravi, 2017                                                     | ✓           | ✓   |                        |                      |               |         |                      |                   |                                 |                               |                     |                                                                                                                                   |
| Laukkanen, 2013                                                    | ✓           | ✓   |                        |                      |               | ✓       |                      | ✓                 | ✓                               | ✓                             | ✓                   |                                                                                                                                   |
| <b>Stroke (in pts with history of stroke/TIA): IFG/IGT-ADA/WHO</b> |             |     |                        |                      |               |         |                      |                   |                                 |                               |                     |                                                                                                                                   |
| Vermeer, 2006                                                      | ✓           | ✓   |                        |                      |               | ✓       |                      |                   | ✓                               |                               |                     | minor ischaemic stroke in history                                                                                                 |
| Pan, 2016                                                          | ✓           | ✓   |                        |                      |               | ✓       |                      |                   | ✓                               | ✓                             |                     | history of IS, TIA, myocardial infarction, angina, congestive heart failure, known atrial fibrillation or flutter, valvular heart |



|                                                                                                                                                                                                                                                 | Confounders |     |                        |                      |               |         |                      |                   |                                 |                               |                     | Further confounders                                                                                                                                                                                      |
|-------------------------------------------------------------------------------------------------------------------------------------------------------------------------------------------------------------------------------------------------|-------------|-----|------------------------|----------------------|---------------|---------|----------------------|-------------------|---------------------------------|-------------------------------|---------------------|----------------------------------------------------------------------------------------------------------------------------------------------------------------------------------------------------------|
|                                                                                                                                                                                                                                                 | Age         | Sex | Ethnicity <sup>a</sup> | Education/i<br>ncome | BMI/<br>waist | Smoking | Physical<br>activity | Alcohol<br>intake | Blood<br>pressure/<br>treatment | Blood<br>lipids/<br>treatment | Chronic<br>diseases |                                                                                                                                                                                                          |
|                                                                                                                                                                                                                                                 |             |     |                        |                      |               |         |                      |                   |                                 |                               |                     | disease, NIHSS on admission, time to randomisation, antiplatelet drugs                                                                                                                                   |
| Zhu, 2017                                                                                                                                                                                                                                       | ✓           | ✓   |                        |                      |               | ✓       |                      | ✓                 | ✓                               | ✓                             |                     | time from onset to hospitalization, ischemic stroke subtypes, baseline NIHSS score.                                                                                                                      |
| <b>Stroke (in pts with history of stroke/TIA): IFG-WHO</b>                                                                                                                                                                                      |             |     |                        |                      |               |         |                      |                   |                                 |                               |                     |                                                                                                                                                                                                          |
| Pan, 2016                                                                                                                                                                                                                                       | ✓           | ✓   |                        |                      |               | ✓       |                      |                   | ✓                               | ✓                             |                     | history of IS, TIA, myocardial infarction, angina, congestive heart failure, known atrial fibrillation or flutter, valvular heart disease, NIHSS on admission, time to randomisation, antiplatelet drugs |
| Zhu, 2017                                                                                                                                                                                                                                       | ✓           | ✓   |                        |                      |               | ✓       |                      | ✓                 | ✓                               | ✓                             |                     | time from onset to hospitalisation, ischaemic stroke subtypes, baseline NIHSS score.                                                                                                                     |
| <b>Poor outcome (defined as degree of disability or dependence in the daily activities of people who have suffered a stroke or other causes of neurological disability of stroke (in pts with history of stroke/TIA): IFG/IGT/HbA1c-ADA/WHO</b> |             |     |                        |                      |               |         |                      |                   |                                 |                               |                     |                                                                                                                                                                                                          |
| Tanaka, 2013                                                                                                                                                                                                                                    | ✓           | ✓   |                        |                      | ✓             | ✓       |                      |                   | ✓                               | ✓                             |                     | baseline NIHSS, stroke subtype, atrial fibrillation, thrombolytic therapy, admission blood glucose levels                                                                                                |
| Roquer, 2014                                                                                                                                                                                                                                    | ✓           |     |                        |                      |               |         |                      |                   |                                 |                               |                     | NIHSS and previous mRS                                                                                                                                                                                   |
| Pan, 2016                                                                                                                                                                                                                                       | ✓           | ✓   |                        |                      |               | ✓       |                      |                   | ✓                               | ✓                             |                     | history of IS, TIA, myocardial infarction, angina, congestive heart failure, known atrial fibrillation or flutter, valvular heart disease, NIHSS on admission, time to randomization, antiplatelet drugs |
| Osei, 2016                                                                                                                                                                                                                                      | ✓           | ✓   |                        |                      |               |         |                      |                   | ✓                               |                               |                     | family history of T2D, NIHSS score on admission, atrial fibrillation, time from stroke onset to IAT,                                                                                                     |
| Zhu, 2017                                                                                                                                                                                                                                       | ✓           | ✓   |                        |                      |               | ✓       |                      | ✓                 | ✓                               | ✓                             |                     | time from onset to hospitalization, ischemic stroke subtypes, baseline NIHSS score.                                                                                                                      |
| <b>Poor outcome (defined as degree of disability or dependence in the daily activities of people who have suffered a stroke or other causes of neurological disability of stroke (in pts with history of stroke/TIA): IFG-WHO</b>               |             |     |                        |                      |               |         |                      |                   |                                 |                               |                     |                                                                                                                                                                                                          |
| Pan, 2016                                                                                                                                                                                                                                       | ✓           | ✓   |                        |                      |               | ✓       |                      |                   | ✓                               | ✓                             |                     | history of IS, TIA, myocardial infarction, angina, congestive heart failure, known atrial fibrillation or flutter, valvular heart disease, NIHSS on admission, time to randomization, antiplatelet drugs |
| Zhu, 2017                                                                                                                                                                                                                                       | ✓           | ✓   |                        |                      |               | ✓       |                      | ✓                 | ✓                               | ✓                             |                     | time from onset to hospitalization, ischemic stroke subtypes, baseline NIHSS score.                                                                                                                      |
| <b>Mortality of stroke (in pts with history of stroke/TIA): IFG/ IGT-ADA/WHO</b>                                                                                                                                                                |             |     |                        |                      |               |         |                      |                   |                                 |                               |                     |                                                                                                                                                                                                          |

|                                                                           | Confounders |     |                        |                      |               |         |                      |                   |                                 |                               |                     | Further confounders                                                                                                                                                                                      |
|---------------------------------------------------------------------------|-------------|-----|------------------------|----------------------|---------------|---------|----------------------|-------------------|---------------------------------|-------------------------------|---------------------|----------------------------------------------------------------------------------------------------------------------------------------------------------------------------------------------------------|
|                                                                           | Age         | Sex | Ethnicity <sup>a</sup> | Education/i<br>ncome | BMI/<br>waist | Smoking | Physical<br>activity | Alcohol<br>intake | Blood<br>pressure/<br>treatment | Blood<br>lipids/<br>treatment | Chronic<br>diseases |                                                                                                                                                                                                          |
| Roquer, 2014                                                              | ✓           |     |                        |                      |               |         |                      |                   |                                 |                               |                     | NIHSS and previous mRS                                                                                                                                                                                   |
| Pan, 2016                                                                 | ✓           | ✓   |                        |                      |               | ✓       |                      |                   | ✓                               | ✓                             |                     | history of IS, TIA, myocardial infarction, angina, congestive heart failure, known atrial fibrillation or flutter, valvular heart disease, NIHSS on admission, time to randomization, antiplatelet drugs |
| Zhu, 2017                                                                 | ✓           | ✓   |                        |                      |               | ✓       |                      | ✓                 | ✓                               | ✓                             |                     | time from onset to hospitalisation, ischaemic stroke subtypes, baseline NIHSS score                                                                                                                      |
| Lorea, 2017                                                               | ✓           | ✓   |                        |                      |               |         |                      |                   |                                 |                               |                     | reason for admission, previous myocardial infarction, glucose, blood pressure in emergency, NIHSS                                                                                                        |
| <b>Mortality of stroke (in pts with history of stroke/TIA): IFG-WHO</b>   |             |     |                        |                      |               |         |                      |                   |                                 |                               |                     |                                                                                                                                                                                                          |
| Pan, 2016                                                                 | ✓           | ✓   |                        |                      |               | ✓       |                      |                   | ✓                               | ✓                             |                     | history of IS, TIA, myocardial infarction, angina, congestive heart failure, known atrial fibrillation or flutter, valvular heart disease, NIHSS on admission, time to randomisation, antiplatelet drugs |
| Zhu, 2017                                                                 | ✓           | ✓   |                        |                      |               | ✓       |                      | ✓                 | ✓                               | ✓                             |                     | time from onset to hospitalization, ischemic stroke subtypes, baseline NIHSS score.                                                                                                                      |
| <b>Mortality of stroke (in pts with history of stroke/TIA): HbA1c-ADA</b> |             |     |                        |                      |               |         |                      |                   |                                 |                               |                     |                                                                                                                                                                                                          |
| Roquer, 2014                                                              | ✓           |     |                        |                      |               |         |                      |                   |                                 |                               |                     | NIHSS and previous mRS                                                                                                                                                                                   |
| Lorea, 2017                                                               | ✓           | ✓   |                        |                      |               |         |                      |                   |                                 |                               |                     | reason for admission, previous myocardial infarction, glucose, blood pressure in emergency, NIHSS                                                                                                        |
| <b>Major adverse cardiac events: IFG/ IGT/HbA1c-ADA/WHO</b>               |             |     |                        |                      |               |         |                      |                   |                                 |                               |                     |                                                                                                                                                                                                          |
| Porter, 2008                                                              | ✓           |     |                        |                      |               |         |                      |                   |                                 |                               | ✓                   | Killip Class, LVEF, renal function, anemia                                                                                                                                                               |
| Fefer, 2008                                                               | ✓           | ✓   |                        |                      |               |         |                      |                   | ✓                               |                               | ✓                   | Killip Class, number of diseased vessels, LVEF                                                                                                                                                           |
| De la Hera, 2009                                                          | ✓           |     |                        |                      |               |         |                      |                   |                                 | ✓                             |                     | indication of PCI, three-vessel or LM-CAD, LVEF, treatment with drug-eluting stents and IIb/IIIa inhibitors                                                                                              |
| Knudsen, 2011                                                             | ✓           | ✓   |                        |                      | ✓             | ✓       |                      |                   | ✓                               | ✓                             | ✓                   | Troponin T and infarct size expressed as percent of ventricular mass                                                                                                                                     |
| Kuramitsu, 2013                                                           | ✓           | ✓   |                        |                      |               |         |                      |                   |                                 | ✓                             | ✓                   |                                                                                                                                                                                                          |

|                                                  | Confounders  |     |                        |                      |               |         |                      |                   |                                 |                               |                     |                                                                                                       |
|--------------------------------------------------|--------------|-----|------------------------|----------------------|---------------|---------|----------------------|-------------------|---------------------------------|-------------------------------|---------------------|-------------------------------------------------------------------------------------------------------|
|                                                  | Age          | Sex | Ethnicity <sup>a</sup> | Education/i<br>ncome | BMI/<br>waist | Smoking | Physical<br>activity | Alcohol<br>intake | Blood<br>pressure/<br>treatment | Blood<br>lipids/<br>treatment | Chronic<br>diseases | Further confounders                                                                                   |
| Shin, 2016                                       | ✓            | ✓   |                        |                      | ✓             |         |                      |                   |                                 | ✓                             |                     | LVEF, Killip class, troponin I                                                                        |
| Samir, 2016                                      | ✓            | ✓   |                        |                      | ✓             | ✓       |                      |                   | ✓                               | ✓                             |                     | LVEF, Killip class, troponin I, coronary lesion features                                              |
| Von Birgelen, 2018                               | ✓            | ✓   |                        |                      |               |         |                      |                   |                                 | ✓                             | ✓                   | previous revascularization                                                                            |
| Choi, 2018                                       | ✓            | ✓   |                        |                      | ✓             | ✓       |                      |                   | ✓                               | ✓                             | ✓                   | multivessel CAD and LVEF                                                                              |
| Farhan, 2019                                     | ✓            | ✓   |                        |                      |               |         |                      |                   |                                 |                               |                     | presence of thin-cap fibroatheroma, presence of minimal luminal area <4 mm <sup>2</sup> and prior PCI |
| <b>Major adverse cardiac events: IGT-ADA/WHO</b> |              |     |                        |                      |               |         |                      |                   |                                 |                               |                     |                                                                                                       |
| Kuramitsu, 2013                                  | ✓            | ✓   |                        |                      |               |         |                      |                   |                                 | ✓                             | ✓                   |                                                                                                       |
| Von Birgelen, 2018                               | ✓            | ✓   |                        |                      |               |         |                      |                   |                                 | ✓                             | ✓                   | previous revascularization                                                                            |
| <b>Major adverse cardiac events: HbA1c-ADA</b>   |              |     |                        |                      |               |         |                      |                   |                                 |                               |                     |                                                                                                       |
| Shin, 2016                                       | ✓            | ✓   |                        |                      | ✓             |         |                      |                   |                                 | ✓                             |                     | LVEF, Killip class, troponin I                                                                        |
| Samir, 2016                                      | ✓            | ✓   |                        |                      | ✓             | ✓       |                      |                   | ✓                               | ✓                             |                     | LVEF, Killip class, troponin I, coronary lesion features                                              |
| Choi, 2018                                       | ✓            | ✓   |                        |                      | ✓             | ✓       |                      |                   | ✓                               | ✓                             | ✓                   | multivessel CAD and LVEF                                                                              |
| <b>Chronic kidney disease: IFG-ADA/WHO</b>       |              |     |                        |                      |               |         |                      |                   |                                 |                               |                     |                                                                                                       |
| Fox, 2005                                        | ✓            | ✓   |                        |                      | ✓             | ✓       |                      |                   | ✓                               | ✓                             | ✓                   | baseline GFR                                                                                          |
| Kurella, 2005                                    | ✓            | ✓   | ✓                      |                      |               |         |                      |                   |                                 |                               |                     |                                                                                                       |
| Lucove, 2008                                     | ✓            | ✓   |                        |                      |               | ✓       |                      |                   |                                 |                               |                     |                                                                                                       |
| Rashidi, 2007                                    | Not reported |     |                        |                      |               |         |                      |                   |                                 |                               |                     |                                                                                                       |
| Sun, 2010                                        | ✓            | ✓   |                        |                      |               | ✓       |                      |                   |                                 |                               |                     | center                                                                                                |
| Ryu, 2009                                        | ✓            | ✓   |                        |                      | ✓             |         |                      |                   | ✓                               | ✓                             |                     | baseline eGFR, GGT, uric acid                                                                         |

|                                          | Confounders  |     |                        |                      |               |         |                      |                   |                                 |                               |                     |                                                       |
|------------------------------------------|--------------|-----|------------------------|----------------------|---------------|---------|----------------------|-------------------|---------------------------------|-------------------------------|---------------------|-------------------------------------------------------|
|                                          | Age          | Sex | Ethnicity <sup>a</sup> | Education/i<br>ncome | BMI/<br>waist | Smoking | Physical<br>activity | Alcohol<br>intake | Blood<br>pressure/<br>treatment | Blood<br>lipids/<br>treatment | Chronic<br>diseases | Further confounders                                   |
| Wanatable, 2012                          | ✓            | ✓   |                        |                      |               |         |                      |                   |                                 |                               |                     |                                                       |
| Schöttker, 2013                          | ✓            | ✓   |                        |                      | ✓             | ✓       |                      |                   | ✓                               | ✓                             | ✓                   | eGFR                                                  |
| <b>Chronic kidney disease: IFG-WHO</b>   |              |     |                        |                      |               |         |                      |                   |                                 |                               |                     |                                                       |
| Kurella, 2005                            | ✓            | ✓   | ✓                      |                      |               |         |                      |                   |                                 |                               |                     |                                                       |
| Lucove, 2008                             | ✓            | ✓   |                        |                      |               | ✓       |                      |                   |                                 |                               |                     |                                                       |
| Rashidi, 2007                            | Not reported |     |                        |                      |               |         |                      |                   |                                 |                               |                     |                                                       |
| Ryu, 2009                                | ✓            | ✓   |                        |                      | ✓             |         |                      |                   | ✓                               | ✓                             |                     | baseline eGFR, GGT, uric acid                         |
| Wanatabe, 2012                           | ✓            | ✓   |                        |                      |               |         |                      |                   | ✓                               |                               | ✓                   |                                                       |
| Schöttker, 2013                          | ✓            | ✓   |                        |                      | ✓             | ✓       |                      |                   | ✓                               | ✓                             | ✓                   | eGFR                                                  |
| <b>Chronic kidney disease: IFG-ADA</b>   |              |     |                        |                      |               |         |                      |                   |                                 |                               |                     |                                                       |
| Schöttker, 2013                          | ✓            | ✓   |                        |                      | ✓             | ✓       |                      |                   | ✓                               | ✓                             | ✓                   | eGFR                                                  |
| Sun, 2010                                | ✓            | ✓   |                        |                      |               | ✓       |                      |                   |                                 |                               |                     | center                                                |
| Selvin, 2011                             | ✓            | ✓   | ✓                      | ✓                    | ✓             | ✓       | ✓                    | ✓                 | ✓                               | ✓                             |                     | family history of diabetes, any ETDRS for retinopathy |
| Xing, 2014                               | ✓            | ✓   | ✓                      |                      | ✓             | ✓       |                      |                   | ✓                               | ✓                             |                     |                                                       |
| <b>Chronic kidney disease: HbA1c-ADA</b> |              |     |                        |                      |               |         |                      |                   |                                 |                               |                     |                                                       |
| Xing, 2014                               | ✓            | ✓   | ✓                      |                      | ✓             | ✓       |                      |                   | ✓                               | ✓                             |                     |                                                       |
| Selvin, 2011                             | ✓            | ✓   | ✓                      | ✓                    | ✓             | ✓       | ✓                    | ✓                 | ✓                               | ✓                             |                     | family history of diabetes, any ETDRS for retinopathy |
| Schöttker, 2013                          | ✓            | ✓   |                        |                      | ✓             | ✓       |                      |                   | ✓                               | ✓                             | ✓                   | eGFR                                                  |
| <b>Total cancer: IFG-ADA/WHO</b>         |              |     |                        |                      |               |         |                      |                   |                                 |                               |                     |                                                       |

|                                  | Confounders |     |                        |                      |               |         |                      |                   |                                 |                               |                     |                                           |
|----------------------------------|-------------|-----|------------------------|----------------------|---------------|---------|----------------------|-------------------|---------------------------------|-------------------------------|---------------------|-------------------------------------------|
|                                  | Age         | Sex | Ethnicity <sup>a</sup> | Education/i<br>ncome | BMI/<br>waist | Smoking | Physical<br>activity | Alcohol<br>intake | Blood<br>pressure/<br>treatment | Blood<br>lipids/<br>treatment | Chronic<br>diseases | Further confounders                       |
| Hirakawa, 2012                   | ✓           | ✓   |                        |                      | ✓             | ✓       | ✓                    | ✓                 |                                 | ✓                             |                     | family history of cancer, dietary factors |
| Balkau, 2002                     | ✓           | ✓   |                        |                      | ✓             |         |                      |                   | ✓                               | ✓                             |                     |                                           |
| Harding, 2012                    | ✓           | ✓   |                        | ✓                    | ✓             | ✓       |                      | ✓                 | ✓                               |                               |                     |                                           |
| Lu, 2003                         | ✓           | ✓   |                        |                      | ✓             | ✓       | ✓                    | ✓                 | ✓                               | ✓                             |                     | insulin                                   |
| Stattin, 2007                    | ✓           |     |                        |                      |               | ✓       |                      |                   |                                 |                               |                     | year of recruitment, fasting time         |
| <b>Total cancer: IFG-WHO</b>     |             |     |                        |                      |               |         |                      |                   |                                 |                               |                     |                                           |
| Balkau, 2002                     | ✓           | ✓   |                        |                      | ✓             |         |                      |                   | ✓                               | ✓                             |                     |                                           |
| Harding, 2012                    | ✓           | ✓   |                        | ✓                    | ✓             | ✓       |                      | ✓                 | ✓                               |                               |                     |                                           |
| Lu, 2003                         | ✓           | ✓   |                        |                      | ✓             | ✓       | ✓                    | ✓                 | ✓                               | ✓                             |                     | insulin                                   |
| Stattin, 2007                    | ✓           |     |                        |                      |               | ✓       |                      |                   |                                 |                               |                     | year of recruitment, fasting time         |
| <b>Total cancer: IGT-ADA/WHO</b> |             |     |                        |                      |               |         |                      |                   |                                 |                               |                     |                                           |
| Harding, 2012                    | ✓           | ✓   |                        | ✓                    | ✓             | ✓       |                      | ✓                 |                                 |                               |                     |                                           |
| Hirakawa, 2012                   | ✓           | ✓   |                        |                      | ✓             | ✓       | ✓                    | ✓                 |                                 | ✓                             |                     | family history of cancer, dietary factors |
| Stengard, 1992                   | ✓           | ✓   |                        |                      | ✓             | ✓       |                      |                   | ✓                               | ✓                             |                     | functional capacity                       |
| Saydah, 2003                     | ✓           | ✓   | ✓                      | ✓                    | ✓             | ✓       | ✓                    | ✓                 | ✓                               | ✓                             |                     |                                           |
| Stattin, 2007                    | ✓           |     |                        |                      |               | ✓       |                      |                   |                                 |                               |                     | year of recruitment, fasting time         |
| Perseghin, 2012                  | ✓           | ✓   |                        |                      |               |         |                      |                   |                                 |                               |                     |                                           |
| <b>Total cancer: IFG/IGT-WHO</b> |             |     |                        |                      |               |         |                      |                   |                                 |                               |                     |                                           |
| Zhou, 2010                       | ✓           | ✓   |                        |                      | ✓             | ✓       |                      |                   | ✓                               | ✓                             |                     |                                           |

|                                                   | Confounders |     |                        |                      |               |         |                      |                   |                                 |                               |                     | Further confounders                                                                       |
|---------------------------------------------------|-------------|-----|------------------------|----------------------|---------------|---------|----------------------|-------------------|---------------------------------|-------------------------------|---------------------|-------------------------------------------------------------------------------------------|
|                                                   | Age         | Sex | Ethnicity <sup>a</sup> | Education/i<br>ncome | BMI/<br>waist | Smoking | Physical<br>activity | Alcohol<br>intake | Blood<br>pressure/<br>treatment | Blood<br>lipids/<br>treatment | Chronic<br>diseases |                                                                                           |
| Kowall, 2011                                      | ✓           | ✓   |                        |                      | ✓             | ✓       | ✓                    | ✓                 | ✓                               | ✓                             | ✓                   | family history of T2D                                                                     |
| <b>Stomach/colorectal cancer: IFG/IGT-ADA/WHO</b> |             |     |                        |                      |               |         |                      |                   |                                 |                               |                     |                                                                                           |
| Hirakawa, 2012                                    | ✓           | ✓   |                        |                      | ✓             | ✓       | ✓                    | ✓                 |                                 | ✓                             |                     | family history of cancer, dietary factors                                                 |
| Parekh, 2013                                      | ✓           | ✓   |                        |                      | ✓             | ✓       |                      | ✓                 |                                 |                               |                     |                                                                                           |
| Zhou, 2010                                        | ✓           | ✓   |                        |                      | ✓             | ✓       |                      |                   | ✓                               | ✓                             |                     |                                                                                           |
| <b>Liver cancer: IFG/IGT-ADA/WHO</b>              |             |     |                        |                      |               |         |                      |                   |                                 |                               |                     |                                                                                           |
| Gwack, 2007                                       | ✓           | ✓   |                        |                      | ✓             | ✓       |                      | ✓                 |                                 |                               |                     | hepatitis B surface antigen seropositivity                                                |
| Hirakawa, 2012                                    | ✓           | ✓   |                        |                      | ✓             | ✓       | ✓                    | ✓                 |                                 | ✓                             |                     | family history of cancer, dietary factors                                                 |
| Zhou, 2010                                        | ✓           | ✓   |                        |                      | ✓             | ✓       |                      |                   | ✓                               | ✓                             |                     |                                                                                           |
| <b>Hepatocellular carcinoma: IFG/IGT-ADA/WHO</b>  |             |     |                        |                      |               |         |                      |                   |                                 |                               |                     |                                                                                           |
| Zhou, 2010                                        | ✓           | ✓   |                        |                      | ✓             | ✓       |                      |                   | ✓                               | ✓                             |                     | normal glucose tolerance                                                                  |
| Batty, 2004                                       | ✓           | ✓   |                        |                      | ✓             | ✓       | ✓                    |                   | ✓                               | ✓                             | ✓                   | marital status, unexplained weight loss, triceps skinfold thickness, height adjusted FEV1 |
| Hirakawa, 2012                                    | ✓           | ✓   |                        |                      |               |         |                      |                   |                                 |                               |                     |                                                                                           |
| Chao, 2011                                        | ✓           | ✓   |                        |                      |               | ✓       |                      | ✓                 |                                 |                               |                     |                                                                                           |
| Jee, 2005                                         | ✓           | ✓   |                        |                      |               | ✓       |                      | ✓                 |                                 |                               |                     | first-degree family history of HCC, and baseline viral factors                            |
| <b>Hepatocellular carcinoma: IFG-ADA</b>          |             |     |                        |                      |               |         |                      |                   |                                 |                               |                     |                                                                                           |
| Hirakawa, 2012                                    | ✓           | ✓   |                        |                      |               |         |                      |                   |                                 |                               |                     |                                                                                           |
| Chao, 2011                                        | ✓           | ✓   |                        |                      |               | ✓       |                      | ✓                 |                                 |                               |                     |                                                                                           |

|                                                   | Confounders |     |                        |                      |               |         |                      |                   |                                 |                               |                     |                                                                                                |
|---------------------------------------------------|-------------|-----|------------------------|----------------------|---------------|---------|----------------------|-------------------|---------------------------------|-------------------------------|---------------------|------------------------------------------------------------------------------------------------|
|                                                   | Age         | Sex | Ethnicity <sup>a</sup> | Education/i<br>ncome | BMI/<br>waist | Smoking | Physical<br>activity | Alcohol<br>intake | Blood<br>pressure/<br>treatment | Blood<br>lipids/<br>treatment | Chronic<br>diseases | Further confounders                                                                            |
| Jee, 2005                                         | ✓           | ✓   |                        |                      |               | ✓       |                      | ✓                 |                                 |                               |                     | first-degree family history of HCC, and baseline viral factors                                 |
| <b>Bronchus and lung cancer: IFG/IGT-ADA/WHO</b>  |             |     |                        |                      |               |         |                      |                   |                                 |                               |                     |                                                                                                |
| Hirakawa, 2012                                    | ✓           | ✓   |                        |                      | ✓             | ✓       | ✓                    | ✓                 |                                 | ✓                             |                     | family history of cancer, dietary factors                                                      |
| Zhou, 2010                                        | ✓           | ✓   |                        |                      | ✓             | ✓       |                      |                   | ✓                               | ✓                             |                     |                                                                                                |
| <b>Prostate cancer: IFG/IGT-ADA/WHO</b>           |             |     |                        |                      |               |         |                      |                   |                                 |                               |                     |                                                                                                |
| Chung, 2009                                       | ✓           |     |                        |                      |               |         |                      |                   |                                 |                               |                     |                                                                                                |
| Parekh, 2013                                      | ✓           | ✓   |                        |                      | ✓             | ✓       |                      | ✓                 |                                 |                               |                     |                                                                                                |
| Zhou, 2010                                        | ✓           | ✓   |                        |                      | ✓             | ✓       |                      |                   | ✓                               | ✓                             |                     |                                                                                                |
| <b>Kidney and bladder cancer: IFG/IGT-ADA/WHO</b> |             |     |                        |                      |               |         |                      |                   |                                 |                               |                     |                                                                                                |
| Chung, 2009                                       | ✓           |     |                        |                      |               |         |                      |                   |                                 |                               |                     |                                                                                                |
| Zhou, 2010                                        | ✓           | ✓   |                        |                      | ✓             | ✓       |                      |                   | ✓                               | ✓                             |                     |                                                                                                |
| <b>Breast cancer: IFG/IGT-ADA/WHO</b>             |             |     |                        |                      |               |         |                      |                   |                                 |                               |                     |                                                                                                |
| Lambe, 2011                                       | ✓           |     |                        |                      |               |         |                      |                   |                                 |                               |                     |                                                                                                |
| Mink, 2002                                        | ✓           | ✓   | ✓                      |                      | ✓             | ✓       |                      | ✓                 |                                 |                               |                     | age at menarche/menopause/first live birth, family history of breast cancer, number of sisters |
| Parekh, 2013                                      | ✓           | ✓   |                        |                      | ✓             | ✓       |                      | ✓                 |                                 |                               |                     |                                                                                                |
| Zhou, 2010                                        | ✓           | ✓   |                        |                      | ✓             | ✓       |                      |                   | ✓                               | ✓                             |                     |                                                                                                |
| <b>Breast cancer: IFG-WHO</b>                     |             |     |                        |                      |               |         |                      |                   |                                 |                               |                     |                                                                                                |
| Lambe, 2011                                       | ✓           |     |                        |                      |               |         |                      |                   |                                 |                               |                     |                                                                                                |
| Parekh, 2013                                      | ✓           | ✓   |                        |                      | ✓             | ✓       |                      | ✓                 |                                 |                               |                     |                                                                                                |

|                                                   | Confounders |     |                        |                      |               |         |                      |                   |                                 |                               |                     |                                                                                                                               |
|---------------------------------------------------|-------------|-----|------------------------|----------------------|---------------|---------|----------------------|-------------------|---------------------------------|-------------------------------|---------------------|-------------------------------------------------------------------------------------------------------------------------------|
|                                                   | Age         | Sex | Ethnicity <sup>a</sup> | Education/i<br>ncome | BMI/<br>waist | Smoking | Physical<br>activity | Alcohol<br>intake | Blood<br>pressure/<br>treatment | Blood<br>lipids/<br>treatment | Chronic<br>diseases | Further confounders                                                                                                           |
| <b>Pancreatic cancer: IFG/IGT-ADA/WHO</b>         |             |     |                        |                      |               |         |                      |                   |                                 |                               |                     |                                                                                                                               |
| Batty, 2004                                       | ✓           |     |                        | ✓                    | ✓             |         | ✓                    |                   | ✓                               | ✓                             | ✓                   | marital status, unexplained weight loss, triceps skin fold thickness, height adjusted forced expiratory volume in one second, |
| Jee, 2005                                         | ✓           | ✓   |                        |                      |               | ✓       |                      | ✓                 |                                 |                               |                     |                                                                                                                               |
| Yun, 2006                                         | ✓           | ✓   |                        |                      | ✓             |         | ✓                    | ✓                 |                                 |                               |                     |                                                                                                                               |
| Zhou, 2010                                        | ✓           | ✓   |                        |                      | ✓             | ✓       |                      |                   | ✓                               | ✓                             |                     |                                                                                                                               |
| Hirakawa, 2012                                    | ✓           | ✓   |                        |                      | ✓             | ✓       | ✓                    | ✓                 |                                 | ✓                             |                     | family history of cancer, dietary factors                                                                                     |
| <b>Pancreatic cancer: IFG-ADA</b>                 |             |     |                        |                      |               |         |                      |                   |                                 |                               |                     |                                                                                                                               |
| Jee, 2005                                         | ✓           | ✓   |                        |                      |               | ✓       |                      | ✓                 |                                 |                               |                     |                                                                                                                               |
| Yun, 2006                                         | ✓           | ✓   |                        |                      | ✓             |         | ✓                    | ✓                 |                                 |                               |                     |                                                                                                                               |
| Hirakawa, 2012                                    | ✓           | ✓   |                        |                      | ✓             | ✓       | ✓                    | ✓                 |                                 | ✓                             |                     | family history of cancer, dietary factors                                                                                     |
| <b>Depressive symptoms: IFG/IGT/HbA1c-ADA/WHO</b> |             |     |                        |                      |               |         |                      |                   |                                 |                               |                     |                                                                                                                               |
| Golden, 2008                                      | ✓           | ✓   | ✓                      | ✓                    | ✓             |         |                      |                   |                                 |                               |                     | examination site                                                                                                              |
| Pieper, 2011                                      | ✓           | ✓   |                        | ✓                    | ✓             |         |                      |                   |                                 |                               |                     | distribution of primary care physicians                                                                                       |
| Demakakos, 2014                                   | ✓           | ✓   |                        | ✓                    |               |         |                      |                   |                                 |                               |                     | baseline depressive symptoms, marital status                                                                                  |
| Okumiya, 2015                                     | ✓           | ✓   |                        |                      |               |         |                      |                   |                                 |                               |                     | depressive tendency at baseline, dependence in activities of daily living                                                     |
| <b>Depressive symptoms: IFG-ADA</b>               |             |     |                        |                      |               |         |                      |                   |                                 |                               |                     |                                                                                                                               |
| Golden, 2008                                      | ✓           | ✓   | ✓                      | ✓                    | ✓             |         |                      |                   |                                 |                               |                     | examination site                                                                                                              |
| Pieper, 2011                                      | ✓           | ✓   |                        | ✓                    | ✓             |         |                      |                   |                                 |                               |                     | distribution of primary care physicians                                                                                       |



|                                                                                                                                                                | Confounders |     |                        |                      |               |         |                      |                   |                                 |                               |                     |                     |
|----------------------------------------------------------------------------------------------------------------------------------------------------------------|-------------|-----|------------------------|----------------------|---------------|---------|----------------------|-------------------|---------------------------------|-------------------------------|---------------------|---------------------|
|                                                                                                                                                                | Age         | Sex | Ethnicity <sup>a</sup> | Education/i<br>ncome | BMI/<br>waist | Smoking | Physical<br>activity | Alcohol<br>intake | Blood<br>pressure/<br>treatment | Blood<br>lipids/<br>treatment | Chronic<br>diseases | Further confounders |
| <b>All-cause dementia: IFG/IGT-ADA/WHO</b>                                                                                                                     |             |     |                        |                      |               |         |                      |                   |                                 |                               |                     |                     |
| No information in the paper/meta-analysis which studies and confounders were included; no access to the supplement and authors did not reply to e-mail request |             |     |                        |                      |               |         |                      |                   |                                 |                               |                     |                     |
| <b>All-cause dementia: IFG</b>                                                                                                                                 |             |     |                        |                      |               |         |                      |                   |                                 |                               |                     |                     |
| No information in the paper/meta-analysis which studies and confounders were included; no access to the supplement and authors did not reply to e-mail request |             |     |                        |                      |               |         |                      |                   |                                 |                               |                     |                     |
| <b>All-cause dementia: IGT</b>                                                                                                                                 |             |     |                        |                      |               |         |                      |                   |                                 |                               |                     |                     |
| No information in the paper/meta-analysis which studies and confounders were included; no access to the supplement and authors did not reply to e-mail request |             |     |                        |                      |               |         |                      |                   |                                 |                               |                     |                     |
| <b>Alzheimer's dementia: IFG/IGT</b>                                                                                                                           |             |     |                        |                      |               |         |                      |                   |                                 |                               |                     |                     |
| No information in the paper/meta-analysis which studies and confounders were included; no access to the supplement and authors did not reply to e-mail request |             |     |                        |                      |               |         |                      |                   |                                 |                               |                     |                     |
| <b>Vascular dementia: IFG/IGT</b>                                                                                                                              |             |     |                        |                      |               |         |                      |                   |                                 |                               |                     |                     |
| No information in the paper/meta-analysis which studies and confounders were included; no access to the supplement and authors did not reply to e-mail request |             |     |                        |                      |               |         |                      |                   |                                 |                               |                     |                     |
| <b>Cognitive impairment: IFG/IGT</b>                                                                                                                           |             |     |                        |                      |               |         |                      |                   |                                 |                               |                     |                     |
| No information in the paper/meta-analysis which studies and confounders were included; no access to the supplement and authors did not reply to e-mail request |             |     |                        |                      |               |         |                      |                   |                                 |                               |                     |                     |

<sup>a</sup> Only studies of participants with multiple ethnicities need to be adjusted for ethnicity.

**ESM Table 6:** Detailed description of the risk of bias assessment in the identified meta-analyses using the risk of bias in systematic reviews (ROBIS) tool

| Review                      | Domain                     |                                         |                                     |                        |                            | Overall judgement                                                                                                                                                                          |
|-----------------------------|----------------------------|-----------------------------------------|-------------------------------------|------------------------|----------------------------|--------------------------------------------------------------------------------------------------------------------------------------------------------------------------------------------|
|                             | Study eligibility criteria | Identification and selection of studies | Data collection and study appraisal | Synthesis and findings | Risk of bias in the review | Explanation                                                                                                                                                                                |
| Aune 2018[119]              | Green                      | Green                                   | Green                               | Orange                 | Orange                     | Unclear definition of prediabetes, unclear study quality, no subgroup/sensitivity analyses possible                                                                                        |
| Aune 2018[118]              | Green                      | Green                                   | Blue                                | Orange                 | Orange                     | Unclear definition of prediabetes, unclear if data extraction and NOS assessment were conducted by two researchers, unclear study quality, no subgroup/sensitivity analyses possible       |
| Cai 2020[114]               | Green                      | Orange                                  | Green                               | Orange                 | Green                      | Only concerns: search restricted to human studies and inclusion of duplicate cohorts, however, when we excluded the duplicate cohorts, the results did not change                          |
| Cai 2021[127]               | Green                      | Orange                                  | Green                               | Green                  | Green                      | Only concerns: search restricted to human studies                                                                                                                                          |
| Echouffo-Tcheugui 2016[121] | Green                      | Green                                   | Green                               | Green                  | Green                      |                                                                                                                                                                                            |
| Fu 2016[125]                | Orange                     | Orange                                  | Orange                              | Orange                 | Orange                     | No adherence to reporting guidelines or checklists (e.g. MOOSE or PRISMA), unclear definition of prediabetes, no clear exclusion criteria provided, study quality not assessed             |
| Huang 2014[123]             | Green                      | Orange                                  | Green                               | Orange                 | Orange                     | Search restricted to human studies, unclear if data extraction and NOS assessment were conducted by two researchers, cancer incidence and mortality pooled, no discussion of study quality |

**ESM Table 6:** Detailed description of the risk of bias assessment in the identified meta-analyses using the risk of bias in systematic reviews (ROBIS) tool

| Review            | Domain                     |                                         |                                     |                        |                            | Overall judgement                                                                                                                                                                                                                                                              |
|-------------------|----------------------------|-----------------------------------------|-------------------------------------|------------------------|----------------------------|--------------------------------------------------------------------------------------------------------------------------------------------------------------------------------------------------------------------------------------------------------------------------------|
|                   | Study eligibility criteria | Identification and selection of studies | Data collection and study appraisal | Synthesis and findings | Risk of bias in the review | Explanation                                                                                                                                                                                                                                                                    |
| Huang 2016[116]   | Green                      | Orange                                  | Green                               | Green                  | Green                      | Only concern: search restricted to human studies, otherwise low risk of bias                                                                                                                                                                                                   |
| Li 2020[115]      | Green                      | Blue                                    | Blue                                | Green                  | Blue                       | Unclear if the steps of the review were conducted by two investigators independently                                                                                                                                                                                           |
| Mitsios 2018[117] | Orange                     | Orange                                  | Orange                              | Green                  | Orange                     | Search restricted to English and human studies, potentially relevant studies excluded due to missing data (no authors contacted), unclear definition of stroke                                                                                                                 |
| Mutie 2020[122]   | Orange                     | Orange                                  | Blue                                | Green                  | Orange                     | No protocol, literature search only conducted on one database and restricted to human studies, unclear if two independent investigators conducted the data extraction and NOS assessment                                                                                       |
| Pan 2019[112]     | Green                      | Orange                                  | Green                               | Orange                 | Orange                     | Search restricted to human studies, unclear if NOS assessment was conducted by two investigators, only studies with NOS $\geq 7$ included in data synthesis, no discussion of limitations of cohort studies                                                                    |
| Tong 2016[126]    | Green                      | Green                                   | Orange                              | Orange                 | Orange                     | Unclear if data extraction and NOS assessment were conducted by two researchers, potentially relevant studies excluded due to missing data (authors not contacted), no subgroup analyses regarding different prediabetes definitions, no discussion of study quality           |
| Xu 2017[124]      | Orange                     | Blue                                    | Blue                                | Orange                 | Orange                     | No protocol, unclear definition of prediabetes, nearly no information on literature search, unclear if NOS assessment were conducted by two researchers, use of fixed effect model, mixed prediabetes definitions, mixed study designs (prospective and retrospective studies) |

**ESM Table 6:** Detailed description of the risk of bias assessment in the identified meta-analyses using the risk of bias in systematic reviews (ROBIS) tool

| Review         | Domain                     |                                         |                                     |                        |                            | Overall judgement                                                                                                                                                                                                          |
|----------------|----------------------------|-----------------------------------------|-------------------------------------|------------------------|----------------------------|----------------------------------------------------------------------------------------------------------------------------------------------------------------------------------------------------------------------------|
|                | Study eligibility criteria | Identification and selection of studies | Data collection and study appraisal | Synthesis and findings | Risk of bias in the review | Explanation                                                                                                                                                                                                                |
| Xue 2019[113]  | High risk                  | High risk                               | Low risk                            | High risk              | High risk                  | No adherence to reporting guidelines or checklists (e.g. MOOSE or PRISMA), unclear definition of prediabetes and dementia, search restricted to English studies, only one database searched, some studies might be missing |
| Zhao 2020[120] | High risk                  | High risk                               | Low risk                            | Low risk               | High risk                  | No protocol, exclusion criteria not defined, 4 studies excluded due to missing data and authors not contacted to receive missing information, literature search restricted to human and English studies                    |

■ low risk; 
 ■ high risk; 
 ■ unclear risk;

NOS, Newcastle-Ottawa scale.

**ESM Table 7:** Certainty of evidence of the included meta-analyses by using the GRADE tool

| Certainty assessment                    |                       |              |               |              |                      |                                         | Effect                               | Certainty        |
|-----------------------------------------|-----------------------|--------------|---------------|--------------|----------------------|-----------------------------------------|--------------------------------------|------------------|
| No of studies                           | Study design          | Risk of bias | Inconsistency | Indirectness | Imprecision          | Other considerations                    | Summary HR (95% confidence interval) |                  |
| <b>All-cause mortality</b>              |                       |              |               |              |                      |                                         |                                      |                  |
| <b>All-cause mortality: IFG-ADA</b>     |                       |              |               |              |                      |                                         |                                      |                  |
| 18                                      | observational studies | not serious  | not serious   | not serious  | not serious          | dose response gradient <sub>a,b,c</sub> | <b>HR 1.08</b><br>(1.03 to 1.13)     | ⊕⊕⊕○<br>MODERATE |
| <b>All-cause mortality: IFG-WHO</b>     |                       |              |               |              |                      |                                         |                                      |                  |
| 19                                      | observational studies | not serious  | not serious   | not serious  | not serious          | dose response gradient <sub>a,b,c</sub> | <b>HR 1.13</b><br>(1.05 to 1.20)     | ⊕⊕⊕○<br>MODERATE |
| <b>All-cause mortality: IGT-ADA/WHO</b> |                       |              |               |              |                      |                                         |                                      |                  |
| 15                                      | observational studies | not serious  | not serious   | not serious  | not serious          | dose response gradient <sub>a,b,c</sub> | <b>HR 1.25</b><br>(1.17 to 1.32)     | ⊕⊕⊕○<br>MODERATE |
| <b>All-cause mortality: HbA1c-ADA</b>   |                       |              |               |              |                      |                                         |                                      |                  |
| 7                                       | observational studies | not serious  | not serious   | not serious  | not serious          | none                                    | <b>HR 0.98</b><br>(0.91 to 1.05)     | ⊕⊕○○<br>LOW      |
| <b>All-cause mortality: IFG/IGT-ADA</b> |                       |              |               |              |                      |                                         |                                      |                  |
| 2                                       | observational studies | not serious  | not serious   | not serious  | serious <sup>d</sup> | dose response gradient <sub>a,b,c</sub> | <b>HR 1.14</b><br>(0.82 to 1.58)     | ⊕⊕○○<br>LOW      |
| <b>All-cause mortality: IFG/IGT-WHO</b> |                       |              |               |              |                      |                                         |                                      |                  |
| 8                                       | observational studies | not serious  | not serious   | not serious  | not serious          | dose response gradient <sub>a,b,c</sub> | <b>HR 1.17</b><br>(1.13 to 1.20)     | ⊕⊕⊕○<br>MODERATE |

| Certainty assessment                                                                            |                       |              |               |              |                      |                      | Effect                               | Certainty        |
|-------------------------------------------------------------------------------------------------|-----------------------|--------------|---------------|--------------|----------------------|----------------------|--------------------------------------|------------------|
| No of studies                                                                                   | Study design          | Risk of bias | Inconsistency | Indirectness | Imprecision          | Other considerations | Summary HR (95% confidence interval) |                  |
| <b>All-cause mortality: IFG/HbA1c-ADA</b>                                                       |                       |              |               |              |                      |                      |                                      |                  |
| 4                                                                                               | observational studies | not serious  | not serious   | not serious  | not serious          | none                 | <b>HR 1.05</b><br>(0.94 to 1.16)     | ⊕⊕○○<br>LOW      |
| <b>Long-term all-cause mortality (in patients after PCI): HbA1c-ADA</b>                         |                       |              |               |              |                      |                      |                                      |                  |
| 3                                                                                               | observational studies | not serious  | not serious   | not serious  | serious <sup>d</sup> | none                 | <b>HR 1.18</b><br>(0.92 to 1.50)     | ⊕○○○<br>VERY LOW |
| <b>Short-term all-cause mortality (in patients after PCI): HbA1c-ADA</b>                        |                       |              |               |              |                      |                      |                                      |                  |
| 2                                                                                               | observational studies | not serious  | not serious   | not serious  | serious <sup>d</sup> | none                 | <b>HR 1.00</b><br>(0.69 to 1.44)     | ⊕○○○<br>VERY LOW |
| <b>All-cause mortality in patients with atherosclerotic cardiovascular disease: IFG-ADA</b>     |                       |              |               |              |                      |                      |                                      |                  |
| 5                                                                                               | observational studies | not serious  | not serious   | not serious  | not serious          | none                 | <b>HR 1.60</b><br>(1.15 to 2.22)     | ⊕⊕○○<br>LOW      |
| <b>All-cause mortality in patients with atherosclerotic cardiovascular disease: IFG-WHO</b>     |                       |              |               |              |                      |                      |                                      |                  |
| 5                                                                                               | observational studies | not serious  | not serious   | not serious  | serious <sup>d</sup> | none                 | <b>HR 1.19</b><br>(0.98 to 1.45)     | ⊕○○○<br>VERY LOW |
| <b>All-cause mortality in patients with atherosclerotic cardiovascular disease: IGT:ADA/WHO</b> |                       |              |               |              |                      |                      |                                      |                  |
| 3                                                                                               | observational studies | not serious  | not serious   | not serious  | serious <sup>d</sup> | none                 | <b>HR 1.34</b><br>(0.94 to 1.93 )    | ⊕○○○<br>VERY LOW |
| <b>All-cause mortality in patients with atherosclerotic cardiovascular disease: HbA1c-ADA</b>   |                       |              |               |              |                      |                      |                                      |                  |
| 2                                                                                               | observational studies | not serious  | not serious   | not serious  | serious <sup>d</sup> | none                 | <b>HR 2.30</b><br>(0.56 to 9.41)     | ⊕○○○<br>VERY LOW |

| Certainty assessment                                                                            |                       |              |               |              |                      |                                         | Effect                               | Certainty        |
|-------------------------------------------------------------------------------------------------|-----------------------|--------------|---------------|--------------|----------------------|-----------------------------------------|--------------------------------------|------------------|
| No of studies                                                                                   | Study design          | Risk of bias | Inconsistency | Indirectness | Imprecision          | Other considerations                    | Summary HR (95% confidence interval) |                  |
| <b>All-cause mortality in patients with atherosclerotic cardiovascular disease: IFG/IGT-ADA</b> |                       |              |               |              |                      |                                         |                                      |                  |
| 2                                                                                               | observational studies | not serious  | not serious   | not serious  | serious <sup>d</sup> | none                                    | <b>HR 1.62</b><br>(0.96 to 2.73)     | ⊕○○○<br>VERY LOW |
| <b>All-cause mortality in patients with atherosclerotic cardiovascular disease: IFG/IGT-WHO</b> |                       |              |               |              |                      |                                         |                                      |                  |
| 2                                                                                               | observational studies | not serious  | not serious   | not serious  | serious <sup>d</sup> | none                                    | <b>HR 1.07</b><br>(0.75 to 1.52)     | ⊕○○○<br>VERY LOW |
| <b>Cardiovascular outcomes &amp; cardiovascular mortality</b>                                   |                       |              |               |              |                      |                                         |                                      |                  |
| <b>CV events: IFG-ADA</b>                                                                       |                       |              |               |              |                      |                                         |                                      |                  |
| 22                                                                                              | observational studies | not serious  | not serious   | not serious  | not serious          | dose response gradient <sub>a,b,c</sub> | <b>HR 1.09</b><br>(1.03 to 1.15)     | ⊕⊕⊕○<br>MODERATE |
| <b>CV events: IFG-WHO</b>                                                                       |                       |              |               |              |                      |                                         |                                      |                  |
| 25                                                                                              | observational studies | not serious  | not serious   | not serious  | not serious          | dose response gradient <sub>a,b,c</sub> | <b>HR 1.20</b><br>(1.09 to 1.34)     | ⊕⊕⊕○<br>MODERATE |
| <b>CV events: IGT-ADA/WHO</b>                                                                   |                       |              |               |              |                      |                                         |                                      |                  |
| 19                                                                                              | observational studies | not serious  | not serious   | not serious  | not serious          | dose response gradient <sub>a,b,c</sub> | <b>HR 1.23</b><br>(1.13 to 1.34)     | ⊕⊕⊕○<br>MODERATE |
| <b>CV events: HbA1c-ADA</b>                                                                     |                       |              |               |              |                      |                                         |                                      |                  |
| 8                                                                                               | observational studies | not serious  | not serious   | not serious  | not serious          | none                                    | <b>HR 1.05</b><br>(0.97 to 1.13)     | ⊕⊕○○<br>LOW      |

| Certainty assessment                                                                  |                       |              |               |              |                      |                                         | Effect                               | Certainty        |
|---------------------------------------------------------------------------------------|-----------------------|--------------|---------------|--------------|----------------------|-----------------------------------------|--------------------------------------|------------------|
| No of studies                                                                         | Study design          | Risk of bias | Inconsistency | Indirectness | Imprecision          | Other considerations                    | Summary HR (95% confidence interval) |                  |
| <b>CV events: IFG/IGT-ADA</b>                                                         |                       |              |               |              |                      |                                         |                                      |                  |
| 2                                                                                     | observational studies | not serious  | not serious   | not serious  | serious <sup>d</sup> | dose response gradient <sub>a,b,c</sub> | <b>HR 1.15</b><br>(0.91 to 1.45)     | ⊕⊕○○<br>LOW      |
| <b>CV events: IFG/IGT-WHO</b>                                                         |                       |              |               |              |                      |                                         |                                      |                  |
| 7                                                                                     | observational studies | not serious  | not serious   | not serious  | not serious          | dose response gradient <sub>a,b,c</sub> | <b>HR 1.10</b><br>(0.99 to 1.21)     | ⊕⊕⊕○<br>MODERATE |
| <b>CV events: IFG/HbA1c-ADA</b>                                                       |                       |              |               |              |                      |                                         |                                      |                  |
| 6                                                                                     | observational studies | not serious  | not serious   | not serious  | not serious          | none                                    | <b>HR 1.05</b><br>(0.97 to 1.13)     | ⊕⊕○○<br>LOW      |
| <b>CV events: IFG/IGT/HbA1c-ADA</b>                                                   |                       |              |               |              |                      |                                         |                                      |                  |
| 2                                                                                     | observational studies | not serious  | not serious   | not serious  | not serious          | none                                    | <b>HR 0.98</b><br>(0.92 to 1.05)     | ⊕⊕○○<br>LOW      |
| <b>CV events in patients with atherosclerotic cardiovascular disease: IFG-ADA</b>     |                       |              |               |              |                      |                                         |                                      |                  |
| 6                                                                                     | observational studies | not serious  | not serious   | not serious  | not serious          | dose response gradient <sub>a,b,c</sub> | <b>HR 1.33</b><br>(1.02 to 1.75)     | ⊕⊕⊕○<br>MODERATE |
| <b>CV events in patients with atherosclerotic cardiovascular disease: IFG-WHO</b>     |                       |              |               |              |                      |                                         |                                      |                  |
| 5                                                                                     | observational studies | not serious  | not serious   | not serious  | serious <sup>d</sup> | dose response gradient <sub>a,b,c</sub> | <b>HR 1.49</b><br>(0.99 to 2.24)     | ⊕⊕○○<br>LOW      |
| <b>CV events in patients with atherosclerotic cardiovascular disease: IGT-ADA/WHO</b> |                       |              |               |              |                      |                                         |                                      |                  |
| 6                                                                                     | observational studies | not serious  | not serious   | not serious  | not serious          | dose response gradient <sub>a,b,c</sub> | <b>HR 1.52</b><br>(1.24 to 1.85)     | ⊕⊕⊕○<br>MODERATE |



| Certainty assessment                                                                                      |                       |              |               |              |                      |                                       | Effect                               | Certainty        |
|-----------------------------------------------------------------------------------------------------------|-----------------------|--------------|---------------|--------------|----------------------|---------------------------------------|--------------------------------------|------------------|
| No of studies                                                                                             | Study design          | Risk of bias | Inconsistency | Indirectness | Imprecision          | Other considerations                  | Summary HR (95% confidence interval) |                  |
| <b>CV events in patients with atherosclerotic cardiovascular disease: HbA1c-ADA</b>                       |                       |              |               |              |                      |                                       |                                      |                  |
| 4                                                                                                         | observational studies | not serious  | not serious   | not serious  | not serious          | none                                  | <b>HR 1.24</b><br>(1.05 to 1.48)     | ⊕⊕○○<br>LOW      |
| <b>CV events in patients with atherosclerotic cardiovascular disease: IFG and/or HbA1c:-ADA</b>           |                       |              |               |              |                      |                                       |                                      |                  |
| 2                                                                                                         | observational studies | not serious  | not serious   | not serious  | not serious          | none                                  | <b>HR 1.61</b><br>(1.07 to 2.43)     | ⊕⊕○○<br>LOW      |
| <b>CV events in patients with atherosclerotic cardiovascular disease: IFG and/or HbA1c and/or IGT-ADA</b> |                       |              |               |              |                      |                                       |                                      |                  |
| 2                                                                                                         | observational studies | not serious  | not serious   | not serious  | serious <sup>d</sup> | none                                  | <b>HR 1.16</b><br>(0.86 to 1.57)     | ⊕○○○<br>VERY LOW |
| <b>CVD mortality: IFG-ADA</b>                                                                             |                       |              |               |              |                      |                                       |                                      |                  |
| 6                                                                                                         | observational studies | not serious  | not serious   | not serious  | not serious          | dose response gradient <sup>a</sup>   | <b>HR 1.27</b><br>(1.02 to 1.58)     | ⊕⊕⊕○<br>MODERATE |
| <b>CVD mortality: IFG-WHO</b>                                                                             |                       |              |               |              |                      |                                       |                                      |                  |
| 13                                                                                                        | observational studies | not serious  | not serious   | not serious  | not serious          | dose response gradient <sup>a</sup>   | <b>HR 1.20</b><br>(1.05 to 1.38)     | ⊕⊕⊕○<br>MODERATE |
| <b>CVD mortality: IGT-ADA/WHO</b>                                                                         |                       |              |               |              |                      |                                       |                                      |                  |
| 9                                                                                                         | observational studies | not serious  | not serious   | not serious  | not serious          | dose response gradient <sup>a</sup>   | <b>HR 1.30</b><br>(1.18 to 1.44)     | ⊕⊕⊕○<br>MODERATE |
| <b>CVD incidence: IFG-ADA</b>                                                                             |                       |              |               |              |                      |                                       |                                      |                  |
| 9                                                                                                         | observational studies | not serious  | not serious   | not serious  | not serious          | dose response gradient <sup>a,b</sup> | <b>HR 1.10</b><br>(1.03 to 1.18)     | ⊕⊕⊕○<br>MODERATE |

| Certainty assessment              |                       |              |               |              |             |                                         | Effect                               | Certainty        |
|-----------------------------------|-----------------------|--------------|---------------|--------------|-------------|-----------------------------------------|--------------------------------------|------------------|
| No of studies                     | Study design          | Risk of bias | Inconsistency | Indirectness | Imprecision | Other considerations                    | Summary HR (95% confidence interval) |                  |
| <b>CVD incidence: IFG-WHO</b>     |                       |              |               |              |             |                                         |                                      |                  |
| 5                                 | observational studies | not serious  | not serious   | not serious  | not serious | dose response gradient <sub>b</sub>     | <b>HR 1.39</b><br>(1.15 to 1.68)     | ⊕⊕⊕○<br>MODERATE |
| <b>CVD incidence: IGT-ADA/WHO</b> |                       |              |               |              |             |                                         |                                      |                  |
| 4                                 | observational studies | not serious  | not serious   | not serious  | not serious | dose response gradient <sub>a,b</sub>   | <b>HR 1.29</b><br>(1.11 to 1.50)     | ⊕⊕⊕○<br>MODERATE |
| <b>CHD: IFG-ADA</b>               |                       |              |               |              |             |                                         |                                      |                  |
| 22                                | observational studies | not serious  | not serious   | not serious  | not serious | dose response gradient <sub>a,b,C</sub> | <b>HR 1.09</b><br>(1.05 to 1.13)     | ⊕⊕⊕○<br>MODERATE |
| <b>CHD: IFG-WHO</b>               |                       |              |               |              |             |                                         |                                      |                  |
| 12                                | observational studies | not serious  | not serious   | not serious  | not serious | dose response gradient <sub>a,b,C</sub> | <b>HR 1.17</b><br>(1.09 to 1.26)     | ⊕⊕⊕○<br>MODERATE |
| <b>CHD: IGT-ADA/WHO</b>           |                       |              |               |              |             |                                         |                                      |                  |
| 11                                | observational studies | not serious  | not serious   | not serious  | not serious | dose response gradient <sub>a,b,C</sub> | <b>HR 1.21</b><br>(1.09 to 1.34)     | ⊕⊕⊕○<br>MODERATE |
| <b>CHD: HbA1c-ADA</b>             |                       |              |               |              |             |                                         |                                      |                  |
| 3                                 | observational studies | not serious  | not serious   | not serious  | not serious | none                                    | <b>HR 1.30</b><br>(1.04 to 1.62)     | ⊕⊕○○<br>LOW      |
| <b>CHD: IFG/IGT-WHO</b>           |                       |              |               |              |             |                                         |                                      |                  |
| 5                                 | observational studies | not serious  | not serious   | not serious  | not serious | dose response gradient <sub>a,b,C</sub> | <b>HR 1.17</b><br>(1.02 to 1.35)     | ⊕⊕⊕○<br>MODERATE |

| Certainty assessment                                                            |                       |              |               |              |                      |                                            | Effect                               | Certainty        |
|---------------------------------------------------------------------------------|-----------------------|--------------|---------------|--------------|----------------------|--------------------------------------------|--------------------------------------|------------------|
| No of studies                                                                   | Study design          | Risk of bias | Inconsistency | Indirectness | Imprecision          | Other considerations                       | Summary HR (95% confidence interval) |                  |
| <b>CHD: IFG/HbA1c-ADA</b>                                                       |                       |              |               |              |                      |                                            |                                      |                  |
| 2                                                                               | observational studies | not serious  | not serious   | not serious  | serious <sup>d</sup> | none                                       | <b>HR 1.11</b><br>(0.88 to 1.39)     | ⊕⊕○○<br>LOW      |
| <b>CHD in patients with atherosclerotic cardiovascular disease: IFG-ADA</b>     |                       |              |               |              |                      |                                            |                                      |                  |
| 2                                                                               | observational studies | not serious  | not serious   | not serious  | serious <sup>d</sup> | none                                       | <b>HR 1.10</b><br>(0.92 to 1.30)     | ⊕○○○<br>VERY LOW |
| <b>CHD in patients with atherosclerotic cardiovascular disease: IFG-WHO</b>     |                       |              |               |              |                      |                                            |                                      |                  |
| 2                                                                               | observational studies | not serious  | not serious   | not serious  | serious <sup>d</sup> | none                                       | <b>HR 1.24</b><br>(0.99 to 1.56)     | ⊕○○○<br>VERY LOW |
| <b>CHD in patients with atherosclerotic cardiovascular disease: IGT-ADA/WHO</b> |                       |              |               |              |                      |                                            |                                      |                  |
| 3                                                                               | observational studies | not serious  | not serious   | not serious  | serious <sup>d</sup> | none                                       | <b>HR 1.14</b><br>(0.84 to 1.54)     | ⊕○○○<br>VERY LOW |
| <b>CHD in patients with atherosclerotic cardiovascular disease: HbA1c-ADA</b>   |                       |              |               |              |                      |                                            |                                      |                  |
| 2                                                                               | observational studies | not serious  | not serious   | not serious  | serious <sup>d</sup> | none                                       | <b>HR 1.16</b><br>(0.65 to 2.05)     | ⊕○○○<br>VERY LOW |
| <b>Stroke: IFG-ADA</b>                                                          |                       |              |               |              |                      |                                            |                                      |                  |
| 16                                                                              | observational studies | not serious  | not serious   | not serious  | not serious          | dose response gradient<br><sub>a,b,C</sub> | <b>HR 1.06</b><br>(1.01 to 1.11)     | ⊕⊕⊕○<br>MODERATE |
| <b>Stroke: IFG-WHO</b>                                                          |                       |              |               |              |                      |                                            |                                      |                  |
| 8                                                                               | observational studies | not serious  | not serious   | not serious  | not serious          | dose response gradient<br><sub>a,b,C</sub> | <b>HR 1.18</b><br>(1.10 to 1.26)     | ⊕⊕⊕○<br>MODERATE |

| Certainty assessment                                                           |                       |              |               |              |                      |                                         | Effect                               | Certainty        |
|--------------------------------------------------------------------------------|-----------------------|--------------|---------------|--------------|----------------------|-----------------------------------------|--------------------------------------|------------------|
| No of studies                                                                  | Study design          | Risk of bias | Inconsistency | Indirectness | Imprecision          | Other considerations                    | Summary HR (95% confidence interval) |                  |
| <b>Stroke: IGT-ADA/WHO</b>                                                     |                       |              |               |              |                      |                                         |                                      |                  |
| 8                                                                              | observational studies | not serious  | not serious   | not serious  | not serious          | dose response gradient <sub>a,b,c</sub> | <b>HR 1.30</b><br>(1.10 to 1.54)     | ⊕⊕⊕○<br>MODERATE |
| <b>Stroke: HbA1c</b>                                                           |                       |              |               |              |                      |                                         |                                      |                  |
| 4                                                                              | observational studies | not serious  | not serious   | not serious  | serious <sup>d</sup> | dose response gradient <sub>e</sub>     | <b>HR 1.19</b><br>(0.87 to 1.63)     | ⊕⊕○○<br>LOW      |
| <b>Stroke: IFG/IGT-WHO</b>                                                     |                       |              |               |              |                      |                                         |                                      |                  |
| 2                                                                              | observational studies | not serious  | not serious   | not serious  | serious <sup>d</sup> | dose response gradient <sub>a,b,c</sub> | <b>HR 1.16</b><br>(0.81 to 1.65)     | ⊕⊕○○<br>LOW      |
| <b>Stroke: IFG and/or HbA1c-ADA</b>                                            |                       |              |               |              |                      |                                         |                                      |                  |
| 2                                                                              | observational studies | not serious  | not serious   | not serious  | serious <sup>d</sup> | none                                    | <b>HR 1.01</b><br>(0.79 to 1.30)     | ⊕○○○<br>VERY LOW |
| <b>Stroke in patients with atherosclerotic cardiovascular disease: IFG-ADA</b> |                       |              |               |              |                      |                                         |                                      |                  |
| 2                                                                              | observational studies | not serious  | not serious   | not serious  | serious <sup>d</sup> | none                                    | <b>HR 0.99</b><br>(0.63 to 1.54)     | ⊕○○○<br>VERY LOW |
| <b>Atrial fibrillation: IFG-ADA or IFG-WHO</b>                                 |                       |              |               |              |                      |                                         |                                      |                  |
| 3                                                                              | observational studies | not serious  | not serious   | not serious  | not serious          | dose response gradient <sub>f</sub>     | <b>HR 1.13</b><br>(1.003 to 1.27)    | ⊕⊕⊕○<br>MODERATE |
| <b>Atrial fibrillation: IFG-ADA</b>                                            |                       |              |               |              |                      |                                         |                                      |                  |
| 3                                                                              | observational studies | not serious  | not serious   | not serious  | not serious          | dose response gradient <sub>f</sub>     | <b>HR 1.13</b><br>(1.03 to 1.24)     | ⊕⊕⊕○<br>MODERATE |

| Certainty assessment                                                  |                       |              |               |              |                      |                                       | Effect                               | Certainty        |
|-----------------------------------------------------------------------|-----------------------|--------------|---------------|--------------|----------------------|---------------------------------------|--------------------------------------|------------------|
| No of studies                                                         | Study design          | Risk of bias | Inconsistency | Indirectness | Imprecision          | Other considerations                  | Summary HR (95% confidence interval) |                  |
| <b>Heart failure: IFG-ADA</b>                                         |                       |              |               |              |                      |                                       |                                      |                  |
| 10                                                                    | observational studies | not serious  | not serious   | not serious  | not serious          | dose response gradient <sub>a,b</sub> | <b>HR 1.10</b><br>(1.06 to 1.14)     | ⊕⊕⊕○<br>MODERATE |
| <b>Heart failure: IFG-WHO</b>                                         |                       |              |               |              |                      |                                       |                                      |                  |
| 6                                                                     | observational studies | not serious  | not serious   | not serious  | not serious          | dose response gradient <sub>a,b</sub> | <b>HR 1.18</b><br>(1.07 to 1.30)     | ⊕⊕⊕○<br>MODERATE |
| <b>Heart failure: IGT-ADA/WHO</b>                                     |                       |              |               |              |                      |                                       |                                      |                  |
| 3                                                                     | observational studies | not serious  | not serious   | not serious  | not serious          | dose response gradient <sub>a,b</sub> | <b>HR 1.58</b><br>(1.04 to 2.39)     | ⊕⊕⊕○<br>MODERATE |
| <b>Sudden cardiac death: IFG/IGT-ADA</b>                              |                       |              |               |              |                      |                                       |                                      |                  |
| 2                                                                     | observational studies | not serious  | not serious   | not serious  | not serious          | none                                  | <b>HR 1.52</b><br>(1.08 to 2.14)     | ⊕⊕○○<br>LOW      |
| <b>Stroke in patients with history of stroke/TIA: IFG/IGT-ADA/WHO</b> |                       |              |               |              |                      |                                       |                                      |                  |
| 3                                                                     | observational studies | not serious  | not serious   | not serious  | serious <sup>d</sup> | none                                  | <b>HR 1.45</b><br>(0.98 to 2.14)     | ⊕○○○<br>VERY LOW |
| <b>Stroke in patients with history of stroke/TIA: IFG-WHO</b>         |                       |              |               |              |                      |                                       |                                      |                  |
| 2                                                                     | observational studies | not serious  | not serious   | not serious  | serious <sup>d</sup> | none                                  | <b>HR 1.17</b><br>(0.55 to 2.48)     | ⊕○○○<br>VERY LOW |

| Certainty assessment                                                                                                                                                                                                                                     |                       |              |                      |              |                      |                      | Effect                               | Certainty        |
|----------------------------------------------------------------------------------------------------------------------------------------------------------------------------------------------------------------------------------------------------------|-----------------------|--------------|----------------------|--------------|----------------------|----------------------|--------------------------------------|------------------|
| No of studies                                                                                                                                                                                                                                            | Study design          | Risk of bias | Inconsistency        | Indirectness | Imprecision          | Other considerations | Summary HR (95% confidence interval) |                  |
| <b>Poor outcomes in patients with history of stroke/TIA: IFG/IGT/HbA1c-ADA/WHO (poor outcomes defined as degree of disability or dependence in the daily activities of people who have suffered a stroke or other causes of neurological disability)</b> |                       |              |                      |              |                      |                      |                                      |                  |
| 5                                                                                                                                                                                                                                                        | observational studies | not serious  | not serious          | not serious  | not serious          | none                 | <b>HR 1.41</b><br>(1.01 to 1.97)     | ⊕⊕○○<br>LOW      |
| <b>Poor outcomes in patients with history of stroke/TIA: IFG-WHO (poor outcomes defined as degree of disability or dependence in the daily activities of people who have suffered a stroke or other causes of neurological disability)</b>               |                       |              |                      |              |                      |                      |                                      |                  |
| 2                                                                                                                                                                                                                                                        | observational studies | not serious  | not serious          | not serious  | not serious          | none                 | <b>HR 1.41</b><br>(1.05 to 1.90)     | ⊕⊕○○<br>LOW      |
| <b>Stroke mortality in patients with history of stroke/TIA: IFG/IGT-ADA/WHO</b>                                                                                                                                                                          |                       |              |                      |              |                      |                      |                                      |                  |
| 4                                                                                                                                                                                                                                                        | observational studies | not serious  | not serious          | not serious  | serious <sup>d</sup> | none                 | <b>HR 1.40</b><br>(0.68 to 2.91)     | ⊕○○○<br>VERY LOW |
| <b>Stroke mortality in patients with history of stroke/TIA: IFG-WHO</b>                                                                                                                                                                                  |                       |              |                      |              |                      |                      |                                      |                  |
| 2                                                                                                                                                                                                                                                        | observational studies | not serious  | not serious          | not serious  | serious <sup>d</sup> | none                 | <b>HR 1.64</b><br>(0.67 to 4.01)     | ⊕○○○<br>VERY LOW |
| <b>Stroke mortality in patients with history of stroke/TIA: HbA1c-ADA</b>                                                                                                                                                                                |                       |              |                      |              |                      |                      |                                      |                  |
| 2                                                                                                                                                                                                                                                        | observational studies | not serious  | serious <sup>b</sup> | not serious  | serious <sup>d</sup> | none                 | <b>HR 1.28</b><br>(0.30 to 5.51)     | ⊕○○○<br>VERY LOW |
| <b>MACE (in patients after PCI): IFG/IGT/HbA1c-ADA/WHO</b>                                                                                                                                                                                               |                       |              |                      |              |                      |                      |                                      |                  |
| 10                                                                                                                                                                                                                                                       | observational studies | not serious  | not serious          | not serious  | not serious          | none                 | <b>HR 1.41</b><br>(1.14 to 1.75)     | ⊕⊕○○<br>LOW      |

| Certainty assessment                             |                       |              |               |              |                      |                                       | Effect                               | Certainty        |
|--------------------------------------------------|-----------------------|--------------|---------------|--------------|----------------------|---------------------------------------|--------------------------------------|------------------|
| No of studies                                    | Study design          | Risk of bias | Inconsistency | Indirectness | Imprecision          | Other considerations                  | Summary HR (95% confidence interval) |                  |
| <b>MACE (in patients after PCI): IGT-ADA/WHO</b> |                       |              |               |              |                      |                                       |                                      |                  |
| 2                                                | observational studies | not serious  | not serious   | not serious  | not serious          | none                                  | <b>HR 1.62</b><br>(1.07 to 2.46)     | ⊕⊕○○<br>LOW      |
| <b>MACE (in patients after PCI): HbA1c-ADA</b>   |                       |              |               |              |                      |                                       |                                      |                  |
| 3                                                | observational studies | not serious  | not serious   | not serious  | serious <sup>d</sup> | none                                  | <b>HR 1.38</b><br>(0.88 to 2.17)     | ⊕○○○<br>VERY LOW |
| <b>Microvascular outcomes</b>                    |                       |              |               |              |                      |                                       |                                      |                  |
| <b>Chronic kidney disease: IFG-ADA/WHO</b>       |                       |              |               |              |                      |                                       |                                      |                  |
| 8                                                | observational studies | not serious  | not serious   | not serious  | not serious          | dose response gradient <sup>b,g</sup> | <b>HR 1.10</b><br>(1.01 to 1.20)     | ⊕⊕⊕○<br>MODERATE |
| <b>Chronic kidney disease: IFG-WHO</b>           |                       |              |               |              |                      |                                       |                                      |                  |
| 6                                                | observational studies | not serious  | not serious   | not serious  | not serious          | dose response gradient <sup>b,g</sup> | <b>HR 1.25</b><br>(1.02 to 1.53)     | ⊕⊕⊕○<br>MODERATE |
| <b>Chronic kidney disease: IFG-ADA</b>           |                       |              |               |              |                      |                                       |                                      |                  |
| 4                                                | observational studies | not serious  | not serious   | not serious  | not serious          | dose response gradient <sup>b,g</sup> | <b>HR 0.97</b><br>(0.94 to 1.01)     | ⊕⊕○○<br>LOW      |
| <b>Chronic kidney disease: HbA1c-ADA</b>         |                       |              |               |              |                      |                                       |                                      |                  |
| 3                                                | observational studies | not serious  | not serious   | not serious  | not serious          | none                                  | <b>HR 1.07</b><br>(0.94 to 1.21)     | ⊕⊕○○<br>LOW      |

| Certainty assessment                              |                       |              |               |                      |             |                                     | Effect                               | Certainty        |
|---------------------------------------------------|-----------------------|--------------|---------------|----------------------|-------------|-------------------------------------|--------------------------------------|------------------|
| No of studies                                     | Study design          | Risk of bias | Inconsistency | Indirectness         | Imprecision | Other considerations                | Summary HR (95% confidence interval) |                  |
| <b>Cancer</b>                                     |                       |              |               |                      |             |                                     |                                      |                  |
| <b>Total cancer: IFG-ADA or IFG-WHO</b>           |                       |              |               |                      |             |                                     |                                      |                  |
| 5                                                 | observational studies | not serious  | not serious   | not serious          | not serious | dose response gradient <sup>a</sup> | <b>HR 1.13</b><br>(1.00 to 1.28)     | ⊕⊕⊕○<br>MODERATE |
| <b>Total cancer: IFG-WHO</b>                      |                       |              |               |                      |             |                                     |                                      |                  |
| 4                                                 | observational studies | not serious  | not serious   | not serious          | not serious | dose response gradient <sup>a</sup> | <b>HR 1.11</b><br>(1.01 to 1.22)     | ⊕⊕⊕○<br>MODERATE |
| <b>Total cancer: IGT-ADA/WHO</b>                  |                       |              |               |                      |             |                                     |                                      |                  |
| 6                                                 | observational studies | not serious  | not serious   | not serious          | not serious | dose response gradient <sup>a</sup> | <b>HR 1.25</b><br>(1.02 to 1.53)     | ⊕⊕⊕○<br>MODERATE |
| <b>Total cancer: IFG/IGT-WHO</b>                  |                       |              |               |                      |             |                                     |                                      |                  |
| 2                                                 | observational studies | not serious  | not serious   | not serious          | not serious | dose response gradient <sup>a</sup> | <b>HR 1.11</b><br>(1.02 to 1.21)     | ⊕⊕⊕○<br>MODERATE |
| <b>Stomach/colorectal cancer: IFG/IGT-ADA/WHO</b> |                       |              |               |                      |             |                                     |                                      |                  |
| 3                                                 | observational studies | not serious  | not serious   | serious <sup>h</sup> | not serious | none                                | <b>HR 1.55</b><br>(1.15 to 2.09)     | ⊕○○○<br>VERY LOW |
| <b>Liver cancer: IFG/IGT-ADA/WHO</b>              |                       |              |               |                      |             |                                     |                                      |                  |
| 3                                                 | observational studies | not serious  | not serious   | not serious          | not serious | strong association <sup>i</sup>     | <b>HR 2.01</b><br>(1.45 to 2.79)     | ⊕⊕⊕○<br>MODERATE |



| Certainty assessment                              |                       |              |               |                      |                      |                                     | Effect                               | Certainty        |
|---------------------------------------------------|-----------------------|--------------|---------------|----------------------|----------------------|-------------------------------------|--------------------------------------|------------------|
| No of studies                                     | Study design          | Risk of bias | Inconsistency | Indirectness         | Imprecision          | Other considerations                | Summary HR (95% confidence interval) |                  |
| <b>Hepatocellular carcinoma: IFG/IGT-ADA/WHO</b>  |                       |              |               |                      |                      |                                     |                                      |                  |
| 5                                                 | observational studies | not serious  | not serious   | not serious          | not serious          | dose response gradient <sub>j</sub> | <b>HR 1.44</b><br>(1.09 to 1.90)     | ⊕⊕⊕○<br>MODERATE |
| <b>Hepatocellular carcinoma: IFG-ADA</b>          |                       |              |               |                      |                      |                                     |                                      |                  |
| 3                                                 | observational studies | not serious  | not serious   | not serious          | not serious          | dose response gradient <sub>j</sub> | <b>HR 1.23</b><br>(1.03 to 1.47)     | ⊕⊕⊕○<br>MODERATE |
| <b>Bronchus and lung cancer: IFG/IGT-ADA/WHO</b>  |                       |              |               |                      |                      |                                     |                                      |                  |
| 2                                                 | observational studies | not serious  | not serious   | serious <sup>h</sup> | serious <sup>d</sup> | none                                | <b>HR 1.35</b><br>(0.86 to 2.11)     | ⊕○○○<br>VERY LOW |
| <b>Prostate cancer: IFG/IGT-ADA/WHO</b>           |                       |              |               |                      |                      |                                     |                                      |                  |
| 3                                                 | observational studies | not serious  | not serious   | not serious          | serious <sup>d</sup> | none                                | <b>HR 1.19</b><br>(0.86 to 1.65)     | ⊕○○○<br>VERY LOW |
| <b>Kidney and bladder cancer: IFG/IGT-ADA/WHO</b> |                       |              |               |                      |                      |                                     |                                      |                  |
| 2                                                 | observational studies | not serious  | not serious   | serious <sup>h</sup> | serious <sup>d</sup> | none                                | <b>HR 0.80</b><br>(0.55 to 1.16)     | ⊕○○○<br>VERY LOW |
| <b>Breast cancer: IFG/IGT-ADA/WHO</b>             |                       |              |               |                      |                      |                                     |                                      |                  |
| 4                                                 | observational studies | not serious  | not serious   | not serious          | not serious          | dose response gradient <sub>j</sub> | <b>HR 1.19</b><br>(1.03 to 1.38)     | ⊕⊕⊕○<br>MODERATE |
| <b>Breast cancer: IFG-WHO</b>                     |                       |              |               |                      |                      |                                     |                                      |                  |
| 2                                                 | observational studies | not serious  | not serious   | not serious          | not serious          | dose response gradient <sub>j</sub> | <b>HR 1.13</b><br>(0.95 to 1.35)     | ⊕⊕⊕○<br>MODERATE |

| Certainty assessment                              |                       |              |               |              |                      |                                     | Effect                               | Certainty        |
|---------------------------------------------------|-----------------------|--------------|---------------|--------------|----------------------|-------------------------------------|--------------------------------------|------------------|
| No of studies                                     | Study design          | Risk of bias | Inconsistency | Indirectness | Imprecision          | Other considerations                | Summary HR (95% confidence interval) |                  |
| <b>Pancreatic cancer: IFG/IGT-ADA/WHO</b>         |                       |              |               |              |                      |                                     |                                      |                  |
| 5                                                 | observational studies | not serious  | not serious   | not serious  | not serious          | none                                | <b>HR 1.22</b><br>(1.11 to 1.34)     | ⊕⊕○○<br>LOW      |
| <b>Pancreatic cancer: IFG-ADA</b>                 |                       |              |               |              |                      |                                     |                                      |                  |
| 3                                                 | observational studies | not serious  | not serious   | not serious  | not serious          | none                                | <b>HR 1.25</b><br>(1.12 to 1.39)     | ⊕⊕○○<br>LOW      |
| <b>Mental/cognitive outcomes</b>                  |                       |              |               |              |                      |                                     |                                      |                  |
| <b>Depressive symptoms: IFG/IGT/HbA1c-ADA/WHO</b> |                       |              |               |              |                      |                                     |                                      |                  |
| 4                                                 | observational studies | not serious  | not serious   | not serious  | serious <sup>d</sup> | none                                | <b>HR 1.07</b><br>(0.80 to 1.43)     | ⊕○○○<br>VERY LOW |
| <b>Depressive symptoms: IFG-ADA</b>               |                       |              |               |              |                      |                                     |                                      |                  |
| 2                                                 | observational studies | not serious  | not serious   | not serious  | serious <sup>d</sup> | none                                | <b>HR 0.91</b><br>(0.67 to 1.23)     | ⊕○○○<br>VERY LOW |
| <b>All-cause dementia: IFG/IGT-ADA/WHO</b>        |                       |              |               |              |                      |                                     |                                      |                  |
| 9                                                 | observational studies | not serious  | not serious   | not serious  | not serious          | dose response gradient <sup>a</sup> | <b>HR 1.18</b><br>(1.02 to 1.36)     | ⊕⊕⊕○<br>MODERATE |
| <b>All-cause dementia: IFG</b>                    |                       |              |               |              |                      |                                     |                                      |                  |
| na                                                | observational studies | not serious  | not serious   | not serious  | not serious          | dose response gradient <sup>a</sup> | <b>HR 1.27</b><br>(1.08 to 1.49)     | ⊕⊕⊕○<br>MODERATE |

| Certainty assessment                                                                                                                                                                                                                                                                                                                                                                                                                                                                                                                                                                                                                                                                                          |                       |              |               |              |             |                                     | Effect                               | Certainty        |
|---------------------------------------------------------------------------------------------------------------------------------------------------------------------------------------------------------------------------------------------------------------------------------------------------------------------------------------------------------------------------------------------------------------------------------------------------------------------------------------------------------------------------------------------------------------------------------------------------------------------------------------------------------------------------------------------------------------|-----------------------|--------------|---------------|--------------|-------------|-------------------------------------|--------------------------------------|------------------|
| No of studies                                                                                                                                                                                                                                                                                                                                                                                                                                                                                                                                                                                                                                                                                                 | Study design          | Risk of bias | Inconsistency | Indirectness | Imprecision | Other considerations                | Summary HR (95% confidence interval) |                  |
| <b>All-cause dementia: IGT</b>                                                                                                                                                                                                                                                                                                                                                                                                                                                                                                                                                                                                                                                                                |                       |              |               |              |             |                                     |                                      |                  |
| na                                                                                                                                                                                                                                                                                                                                                                                                                                                                                                                                                                                                                                                                                                            | observational studies | not serious  | not serious   | not serious  | not serious | dose response gradient <sup>a</sup> | <b>HR 1.40</b><br>(1.03 to 1.91)     | ⊕⊕⊕○<br>MODERATE |
| <b>Alzheimer's dementia: IFG/IGT</b>                                                                                                                                                                                                                                                                                                                                                                                                                                                                                                                                                                                                                                                                          |                       |              |               |              |             |                                     |                                      |                  |
| 5                                                                                                                                                                                                                                                                                                                                                                                                                                                                                                                                                                                                                                                                                                             | observational studies | not serious  | not serious   | not serious  | not serious | none                                | <b>HR 1.36</b><br>(1.09 to 1.70)     | ⊕⊕○○<br>LOW      |
| <b>Vascular dementia: IFG/IGT</b>                                                                                                                                                                                                                                                                                                                                                                                                                                                                                                                                                                                                                                                                             |                       |              |               |              |             |                                     |                                      |                  |
| 3                                                                                                                                                                                                                                                                                                                                                                                                                                                                                                                                                                                                                                                                                                             | observational studies | not serious  | not serious   | not serious  | not serious | none                                | <b>HR 1.47</b><br>(1.01 to 2.15)     | ⊕⊕○○<br>LOW      |
| <b>Cognitive impairment: IFG/IGT</b>                                                                                                                                                                                                                                                                                                                                                                                                                                                                                                                                                                                                                                                                          |                       |              |               |              |             |                                     |                                      |                  |
| 5                                                                                                                                                                                                                                                                                                                                                                                                                                                                                                                                                                                                                                                                                                             | observational studies | not serious  | not serious   | not serious  | not serious | none                                | <b>HR 0.96</b><br>(0.85 to 1.09)     | ⊕⊕○○<br>LOW      |
| ADA, American Diabetes Association; CHD, coronary heart disease; CI, confidence interval; CV, cardiovascular; CVD, cardiovascular disease; HR: Hazard ratio, IDF, International Diabetes Federation; IFG, impaired fasting glucose; IGT, impaired glucose tolerance; MACE, major adverse cardiac events; TIA, transient ischemic attack; WHO, World Health Organization.                                                                                                                                                                                                                                                                                                                                      |                       |              |               |              |             |                                     |                                      |                  |
| a: upgraded: stronger association for IGT than for IFG<br>b: upgraded: stronger association for IFG-WHO than for IFG-ADA<br>c: upgraded: dose-response gradient shown in Cai, 2020 [114]<br>d: downgraded: 95% CI includes the null value and includes important benefit (SHR ≤0.75) and/or harm benefit (SHR ≥1.25)<br>e: upgraded: dose-response gradient shown in Mitsios, 2018 [117]<br>f: upgraded: dose-response gradient shown in Aune, 2017 [118]<br>g: upgraded: stronger association for IFG-WHO than for IFG-WHO and IFG-ADA combined<br>h: downgraded: mixed outcome were analysed<br>i: upgraded: strong association: SHR >2<br>j: upgraded: stronger association for IFG/IGT than for IFG alone |                       |              |               |              |             |                                     |                                      |                  |

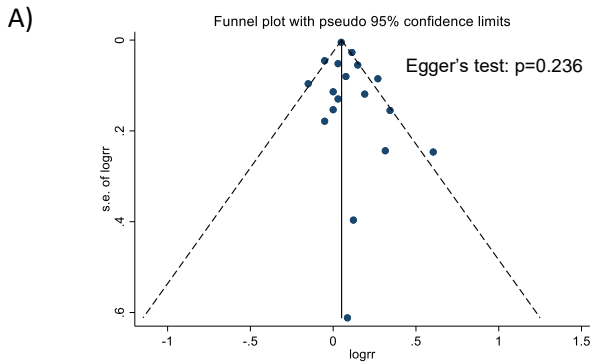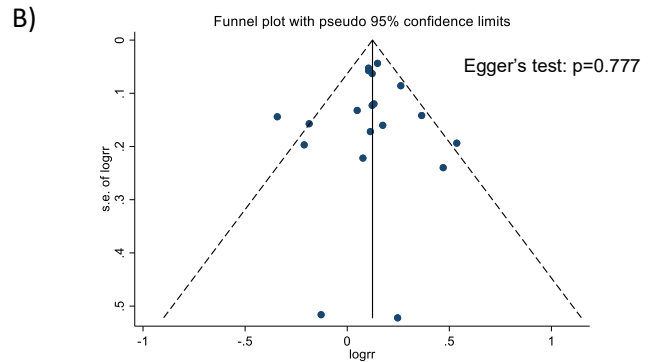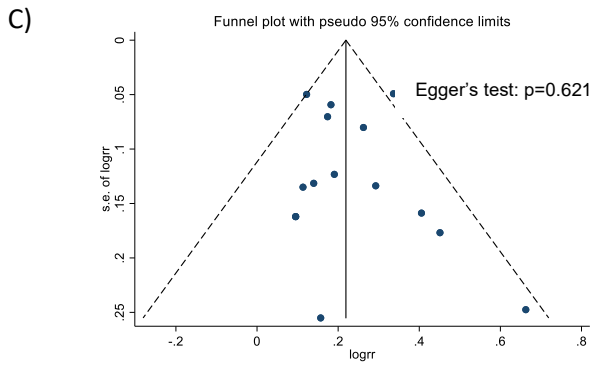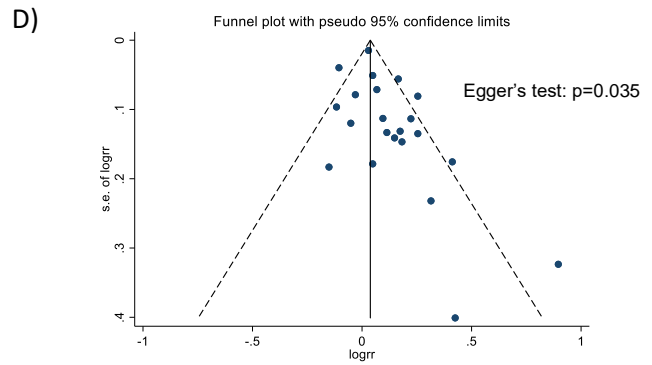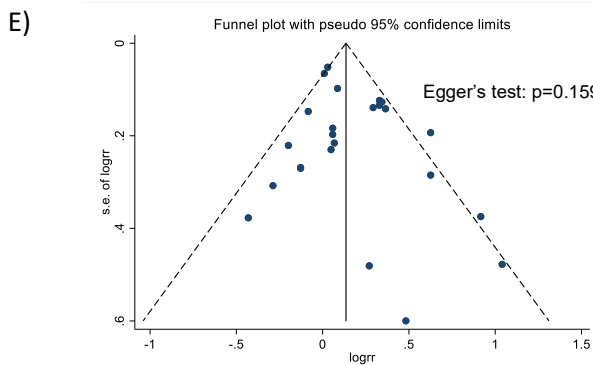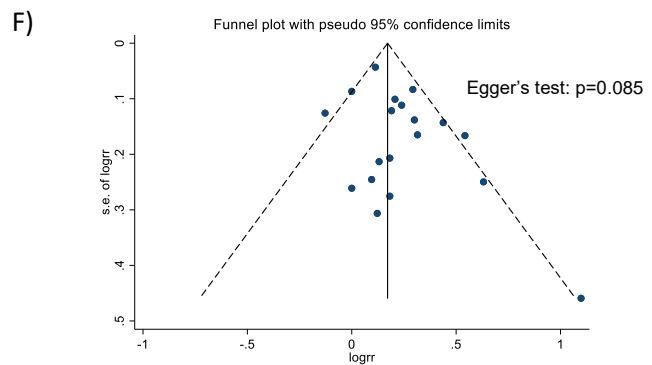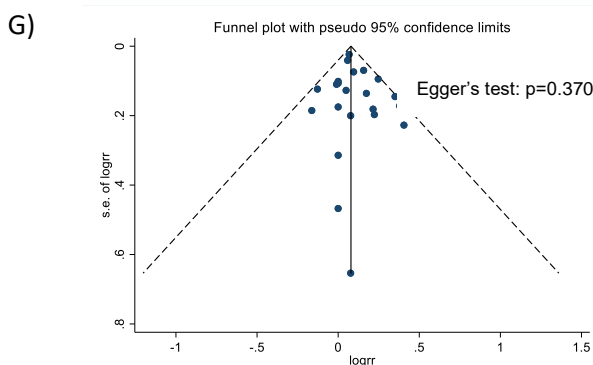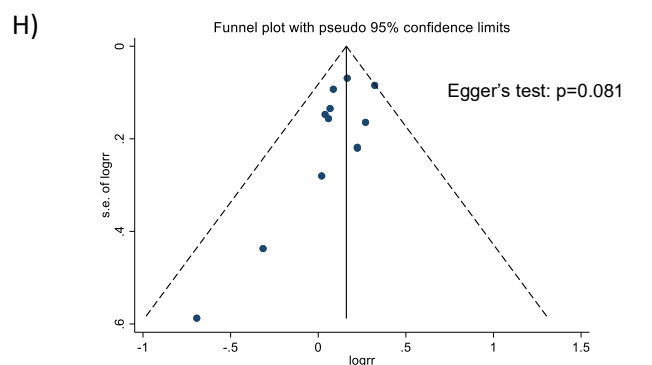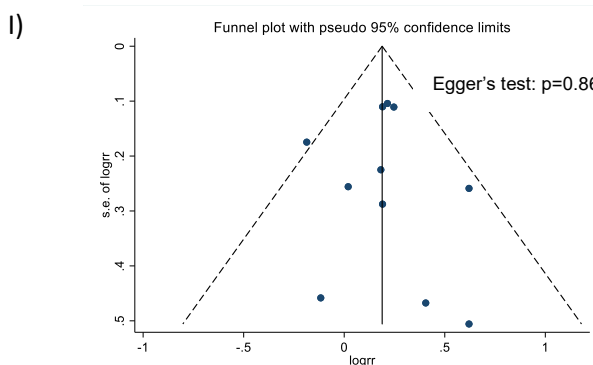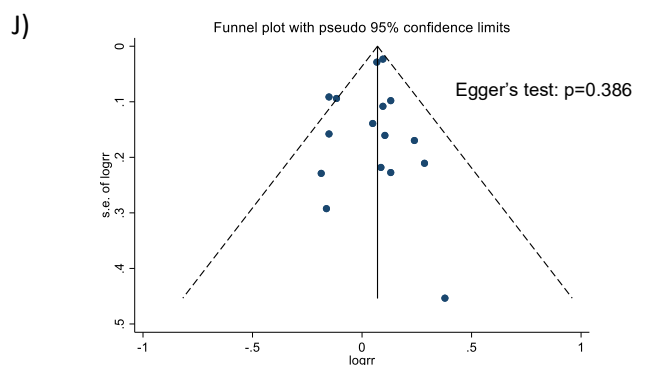

K)

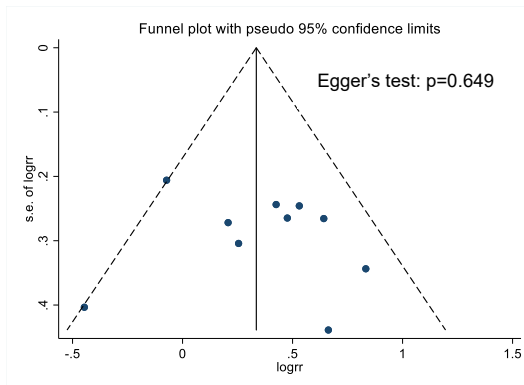

L)

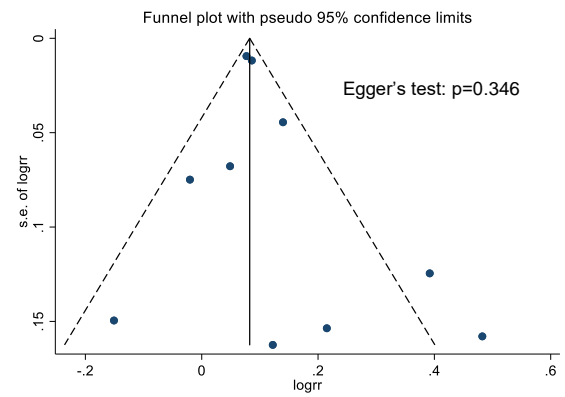

**ESM Fig. 1:** Funnel plots for the association between prediabetes and A) all-cause mortality (IFG-ADA), B) all-cause mortality (IFG-WHO), C) all-cause mortality (IGT), D) cardiovascular events (IFG-ADA), E) cardiovascular events (IFG-WHO), F) cardiovascular events (IGT), G) coronary heart disease (IFG-ADA), H) coronary heart disease (IFG-WHO), I) coronary heart disease (IGT), J) stroke (IFG-ADA), K) Major adverse cardiac events (MACE) in patients after percutaneous coronary intervention (PCI) (IFG/IGT/HbA1c), and L) heart failure (IFG-ADA)

## References

- [1] Atan NAD, Koushki M, Motedayen M, et al. (2017) Type 2 diabetes mellitus and non-alcoholic fatty liver disease: a systematic review and meta-analysis. *Gastroenterology & Hepatology from Bed to Bench* 10: 1-7
- [2] Aune D, Schlesinger S, Neuenschwander M, et al. (2018) Diabetes mellitus, blood glucose and the risk of heart failure: A systematic review and meta-analysis of prospective studies. *Nutrition, metabolism, and cardiovascular diseases : NMCD* 28(11): 1081-1091. 10.1016/j.numecd.2018.07.005
- [3] Aune D, Schlesinger S, Norat T, Riboli E (2018) Diabetes mellitus and the risk of abdominal aortic aneurysm: A systematic review and meta-analysis of prospective studies. *Journal of diabetes and its complications* 32(12): 1169-1174. 10.1016/j.jdiacomp.2018.09.009
- [4] Boyle P, Koechlin A, Pizot C, et al. (2013) Blood glucose concentrations and breast cancer risk in women without diabetes: a meta-analysis. *European journal of nutrition* 52(5): 1533-1540. 10.1007/s00394-012-0460-z
- [5] Cavero-Redondo I, Peleteiro B, Alvarez-Bueno C, Rodriguez-Artalejo F, Martinez-Vizcaino V (2017) Glycated haemoglobin A1c as a risk factor of cardiovascular outcomes and all-cause mortality in diabetic and nondiabetic populations: a systematic review and meta-analysis. *BMJ open* 7(7). 10.1136/bmjopen-2017-015949
- [6] Cooper C, Sommerlad A, Lyketsos CG, Livingston G (2015) Modifiable predictors of dementia in mild cognitive impairment: a systematic review and meta-analysis. *The American journal of psychiatry* 172(4): 323-334. 10.1176/appi.ajp.2014.14070878
- [7] de Beer JC, Liebenberg L (2014) Does cancer risk increase with HbA1c, independent of diabetes? *British journal of cancer* 110(9): 2361-2368. 10.1038/bjc.2014.150
- [8] Einarson TR, Machado M, Hemels MEH (2011) Blood glucose and subsequent cardiovascular disease: update of a meta-analysis. *Current medical research and opinion* 27(11): 2155-2163. 10.1185/03007995.2011.626760
- [9] Feinkohl I, Winterer G, Pischon T (2017) Diabetes is associated with risk of postoperative cognitive dysfunction: A meta-analysis. *Diabetes/metabolism research and reviews* 33(5). 10.1002/dmrr.2884
- [10] Geng J, Zhang Y, Wang B, Xie J, Xu B, Li J (2017) Glycosylated hemoglobin levels and clinical outcomes in nondiabetic patients with coronary artery disease: A meta-analysis. *Medicine* 96(17): e6784. 10.1097/md.0000000000006784
- [11] Han H, Zhang T, Jin Z, et al. (2017) Blood glucose concentration and risk of liver cancer: systematic review and meta-analysis of prospective studies. *Oncotarget* 8(30): 50164-50173. 10.18632/oncotarget.16816
- [12] Hsu YT, Nair M, Angelov N, Lalla E, Lee CT (2019) Impact of diabetes on clinical periodontal outcomes following non-surgical periodontal therapy. *Journal of clinical periodontology* 46(2): 206-217. 10.1111/jcpe.13044
- [13] Jayedi A, Djafarian K, Rezagholizadeh F, Mirzababaei A, Hajimohammadi M, Shab-Bidar S (2018) Fasting blood glucose and risk of prostate cancer: A systematic review and meta-analysis of dose-response. *Diabetes & metabolism* 44(4): 320-327. 10.1016/j.diabet.2017.09.004

- [14] Kaminski MR, Raspovic A, McMahon LP, et al. (2015) Risk factors for foot ulceration and lower extremity amputation in adults with end-stage renal disease on dialysis: a systematic review and meta-analysis. *Nephrology, dialysis, transplantation : official publication of the European Dialysis and Transplant Association - European Renal Association* 30(10): 1747-1766. 10.1093/ndt/gfv114
- [15] Kikuta K, Masamune A, Shimosegawa T (2015) Impaired glucose tolerance in acute pancreatitis. *World journal of gastroenterology* 21(24): 7367-7374. 10.3748/wjg.v21.i24.7367
- [16] Koye DN, Shaw JE, Reid CM, Atkins RC, Reutens AT, Magliano DJ (2017) Incidence of chronic kidney disease among people with diabetes: a systematic review of observational studies. *Diabetic Medicine* 34(7): 887-901. 10.1111/dme.13324
- [17] Lau LH, Lew J, Borschmann K, Thijs V, Ekinici EI (2019) The prevalence of Diabetes and its effects on Stroke Outcomes; a meta-analysis and literature review. *Journal of diabetes investigation* 10(3): 780-792. 10.1111/jdi.12932
- [18] Li J, Shao YH, Gong YP, Lu YH, Liu Y, Li CL (2014) Diabetes mellitus and dementia - a systematic review and meta-analysis. *European review for medical and pharmacological sciences* 18(12): 1778-1789
- [19] Liu Y, Yang YM, Zhu J, Tan HQ, Liang Y, Li JD (2011) Prognostic significance of hemoglobin A1c level in patients hospitalized with coronary artery disease. A systematic review and meta-analysis. *Cardiovascular diabetology* 10: 98. 10.1186/1475-2840-10-98
- [20] Miller IM, Skaaby T, Ellervik C, Jemec GB (2013) Quantifying cardiovascular disease risk factors in patients with psoriasis: a meta-analysis. *The British journal of dermatology* 169(6): 1180-1187. 10.1111/bjd.12490
- [21] Mistry BD, Alavi A, Ali S, Mistry N (2017) A systematic review of the relationship between glycemic control and necrobiosis lipoidica diabetorum in patients with diabetes mellitus. *International journal of dermatology* 56(12): 1319-1327. 10.1111/ijd.13610
- [22] Monje A, Catena A, Borgnakke WS (2017) Association between diabetes mellitus/hyperglycaemia and peri-implant diseases: Systematic review and meta-analysis. *Journal of clinical periodontology* 44(6): 636-648. 10.1111/jcpe.12724
- [23] Pal K, Mukadam N, Petersen I, Cooper C (2018) Mild cognitive impairment and progression to dementia in people with diabetes, prediabetes and metabolic syndrome: a systematic review and meta-analysis. *Social psychiatry and psychiatric epidemiology* 53(11): 1149-1160. 10.1007/s00127-018-1581-3
- [24] Qi W, Zhang N, Korantzopoulos P, et al. (2017) Serum glycated hemoglobin level as a predictor of atrial fibrillation: A systematic review with meta-analysis and meta-regression. *PLoS one* 12(3): e0170955. 10.1371/journal.pone.0170955
- [25] Santos-Oliveira R, Purdy C, da Silva MP, dos Anjos Carneiro-Leão AM, Machado M, Einarson TR (2011) Haemoglobin A1c levels and subsequent cardiovascular disease in persons without diabetes: a meta-analysis of prospective cohorts. *Diabetologia* 54(6): 1327-1334. 10.1007/s00125-011-2078-8
- [26] Sarwar N, Aspelund T, Eiriksdottir G, et al. (2010) Markers of dysglycaemia and risk of coronary heart disease in people without diabetes: Reykjavik prospective study and systematic review. *PLoS medicine* 7(5): e1000278. 10.1371/journal.pmed.1000278

- [27] Shi J, Xiong L, Li J, et al. (2015) A Linear Dose-Response Relationship between Fasting Plasma Glucose and Colorectal Cancer Risk: Systematic Review and Meta-analysis. *Scientific reports* 5: 17591. 10.1038/srep17591
- [28] Tan J, You Y, Guo F, Xu J, Dai H, Bie P (2017) Association of elevated risk of pancreatic cancer in diabetic patients: A systematic review and meta-analysis. *Oncology letters* 13(3): 1247-1255. 10.3892/ol.2017.5586
- [29] Williams MF, London DA, Husni EM, Navaneethan S, Kashyap SR (2016) Type 2 diabetes and osteoarthritis: a systematic review and meta-analysis. *Journal of diabetes and its complications* 30(5): 944-950. 10.1016/j.jdiacomp.2016.02.016
- [30] Xu J, Ye Y, Wu H, et al. (2016) Association between markers of glucose metabolism and risk of colorectal cancer. *BMJ open* 6(6): e011430. 10.1136/bmjopen-2016-011430
- [31] Zhong GC, Ye MX, Cheng JH, Zhao Y, Gong JP (2016) HbA1c and Risks of All-Cause and Cause-Specific Death in Subjects without Known Diabetes: A Dose-Response Meta-Analysis of Prospective Cohort Studies. *Scientific reports* 6: 24071. 10.1038/srep24071
- [32] Abudawood M (2019) Diabetes and cancer: A comprehensive review. *Journal of Research in Medical Sciences* 24. 10.4103/jrms.JRMS\_242\_19
- [33] Akhtar S, Nasir JA, Abbas T, Sarwar A (2019) Diabetes in Pakistan: A systematic review and meta-analysis. *Pakistan journal of medical sciences* 35(4): 1173-1178. 10.12669/pjms.35.4.194
- [34] Jiang X, Zhu Y, Liu Z, Tian Z, Zhu S (2020) Association between diabetes and dental implant complications: a systematic review and meta-analysis. *Acta Odontol Scand*: 1-10. 10.1080/00016357.2020.1761031
- [35] Li X, Li L, Xing Y, Cheng T, Ren S, Ma H (2020) Diabetes Mellitus Is Associated with a Lower Risk of Gout: A Meta-Analysis of Observational Studies. *J Diabetes Res* 2020: 5470739. 10.1155/2020/5470739
- [36] Pan W, Lu H, Lian B, Liao P, Guo L, Zhang M (2019) Prognostic value of HbA1c for in-hospital and short-term mortality in patients with acute coronary syndrome: a systematic review and meta-analysis. *Cardiovasc Diabetol* 18(1): 169. 10.1186/s12933-019-0970-6
- [37] Wang J, Luo X, Jin X, et al. (2020) Effects of Preoperative HbA1c Levels on the Postoperative Outcomes of Coronary Artery Disease Surgical Treatment in Patients with Diabetes Mellitus and Nondiabetic Patients: A Systematic Review and Meta-Analysis. *J Diabetes Res* 2020: 3547491. 10.1155/2020/3547491
- [38] Alatawi Z, Mirghani H (2020) The Association Between Glycemic Variability and Myocardial Infarction: A Review and Meta-Analysis of Prospective Studies and Randomized Trials. *Cureus* 12(11): e11556. 10.7759/cureus.11556
- [39] Bao Y, Gu D (2021) Glycated Hemoglobin as a Marker for Predicting Outcomes of Patients With Stroke (Ischemic and Hemorrhagic): A Systematic Review and Meta-Analysis. *Front Neurol* 12: 642899. 10.3389/fneur.2021.642899
- [40] Arnold LW, Wang Z (2014) The HbA1c and all-cause mortality relationship in patients with type 2 diabetes is J-shaped: a meta-analysis of observational studies. *The review of diabetic studies : RDS* 11(2): 138-152. 10.1900/rds.2014.11.138



- [41] Bejan-Angoulvant T, Cornu C, Archambault P, et al. (2015) Is HbA1c a valid surrogate for macrovascular and microvascular complications in type 2 diabetes? *Diabetes & metabolism* 41(3): 195-201. 10.1016/j.diabet.2015.04.001
- [42] Erqou S, Lee CT, Suffoletto M, et al. (2013) Association between glycated haemoglobin and the risk of congestive heart failure in diabetes mellitus: systematic review and meta-analysis. *European journal of heart failure* 15(2): 185-193. 10.1093/eurjhf/hfs156
- [43] Gorst C, Kwok CS, Aslam S, et al. (2015) Long-term Glycemic Variability and Risk of Adverse Outcomes: A Systematic Review and Meta-analysis. *Diabetes care* 38(12): 2354-2369. 10.2337/dc15-1188
- [44] Harding KA, Pushpanathan ME, Whitworth SR, Nanthakumar S, Bucks RS, Skinner TC (2019) Depression prevalence in Type 2 diabetes is not related to diabetes-depression symptom overlap but is related to symptom dimensions within patient self-report measures: a meta-analysis. *Diabet Med* 36(12): 1600-1611. 10.1111/dme.14139
- [45] Song P, Yu J, Chan KY, Theodoratou E, Rudan I (2018) Prevalence, risk factors and burden of diabetic retinopathy in China: a systematic review and meta-analysis. *Journal of global health* 8(1): 010803. 10.7189/jogh.08.010803
- [46] Wang P, Huang R, Lu S, et al. (2015) HbA1c below 7% as the goal of glucose control fails to maximize the cardiovascular benefits: a meta-analysis. *Cardiovascular diabetology* 14: 124. 10.1186/s12933-015-0285-1
- [47] Zheng J, Cheng J, Zhang Q, Qi C, Wang T, Xiao X (2016) Association Between Glycosylated Hemoglobin Level and Cardiovascular Outcomes in Diabetic Patients After Percutaneous Coronary Intervention. *Medicine* 95(19): e3696. 10.1097/MD.0000000000003696
- [48] Zhou ZY, Liu YK, Chen HL, Yang HL, Liu F (2015) HbA1c and Lower Extremity Amputation Risk in Patients With Diabetes: A Meta-Analysis. *The international journal of lower extremity wounds* 14(2): 168-177. 10.1177/1534734615593190
- [49] Iwanicki C, Logomarsino JV (2019) Impaired glucose tolerance, body mass index and respiratory function in patients with cystic fibrosis: A systematic review. *The clinical respiratory journal* 13(6): 341-354. 10.1111/crj.13019
- [50] Shiferaw WS, Akalu TY, Desta M, et al. (2020) Glycated hemoglobin A1C level and the risk of diabetic retinopathy in Africa: A systematic review and meta-analysis. *Diabetes Metab Syndr* 14(6): 1941-1949. 10.1016/j.dsx.2020.10.003
- [51] Liu X, Xu Y, An M, Zeng Q (2019) The risk factors for diabetic peripheral neuropathy: A meta-analysis. *PloS one* 14(2): e0212574. 10.1371/journal.pone.0212574
- [52] Adeloje D, Ige JO, Aderemi AV, et al. (2017) Estimating the prevalence, hospitalisation and mortality from type 2 diabetes mellitus in Nigeria: a systematic review and meta-analysis. *BMJ open* 7(5): e015424. 10.1136/bmjopen-2016-015424
- [53] Barua R, Templeton AJ, Seruga B, Ocana A, Amir E, Ethier JL (2018) Hyperglycaemia and Survival in Solid Tumours: A Systematic Review and Meta-analysis. *Clinical oncology (Royal College of Radiologists (Great Britain))* 30(4): 215-224. 10.1016/j.clon.2018.01.003
- [54] Hopper I, Billah B, Skiba M, Krum H (2011) Prevention of diabetes and reduction in major cardiovascular events in studies of subjects with prediabetes: meta-analysis of

randomised controlled clinical trials. *European journal of cardiovascular prevention and rehabilitation : official journal of the European Society of Cardiology, Working Groups on Epidemiology & Prevention and Cardiac Rehabilitation and Exercise Physiology* 18(6): 813-823. 10.1177/1741826711421687

[55] Hussain MA, Bin-Ayeed SA, Saeed OQ, Verma S, Al-Omran M (2016) Impact of diabetes on carotid artery revascularization. *Journal of vascular surgery* 63(4): 1099-+. 10.1016/j.jvs.2015.12.041

[56] Leal J, Morrow LM, Khurshid W, Pagano E, Feenstra T (2019) Decision models of prediabetes populations: A systematic review. *Diabetes, obesity & metabolism* 21(7): 1558-1569. 10.1111/dom.13684

[57] Pillinger T, Beck K, Gobjila C, Donocik JG, Jauhar S, Howes OD (2017) Impaired Glucose Homeostasis in First-Episode Schizophrenia: A Systematic Review and Meta-analysis. *JAMA psychiatry* 74(3): 261-269. 10.1001/jamapsychiatry.2016.3803

[58] Rashidbeygi E, Safabakhsh M, Delshad Aghdam S, Mohammed SH, Alizadeh S (2019) Metabolic syndrome and its components are related to a higher risk for albuminuria and proteinuria: Evidence from a meta-analysis on 10,603,067 subjects from 57 studies. *Diabetes & metabolic syndrome* 13(1): 830-843. 10.1016/j.dsx.2018.12.006

[59] Stevens JW, Khunti K, Harvey R, et al. (2015) Preventing the progression to Type 2 diabetes mellitus in adults at high risk: A systematic review and network meta-analysis of lifestyle, pharmacological and surgical interventions. *Diabetes research and clinical practice* 107(3): 320-331. 10.1016/j.diabres.2015.01.027

[60] Zhang X, Gregg EW, Williamson DF, et al. (2010) A1C level and future risk of diabetes: a systematic review. *Diabetes care* 33(7): 1665-1673. 10.2337/dc09-1939

[61] Akhtar S, Nasir JA, Sarwar A, et al. (2020) Prevalence of diabetes and pre-diabetes in Bangladesh: a systematic review and meta-analysis. *BMJ Open* 10(9): e036086. 10.1136/bmjopen-2019-036086

[62] Chivese T, Werfalli MM, Magodoro I, et al. (2019) Prevalence of type 2 diabetes mellitus in women of childbearing age in Africa during 2000-2016: a systematic review and meta-analysis. *BMJ open* 9(5): e024345. 10.1136/bmjopen-2018-024345

[63] Mirahmadizadeh A, Fathalipour M, Mokhtari AM, Zeighami S, Hassanipour S, Heiran A (2020) The prevalence of undiagnosed type 2 diabetes and prediabetes in Eastern Mediterranean region (EMRO): A systematic review and meta-analysis. *Diabetes Res Clin Pract* 160: 107931. 10.1016/j.diabres.2019.107931

[64] Zhang B, Zhang B, Zhou Z, Guo Y, Wang D (2021) The value of glycosylated hemoglobin in the diagnosis of diabetic retinopathy: a systematic review and Meta-analysis. *BMC Endocr Disord* 21(1): 82. 10.1186/s12902-021-00737-2

[65] Au Yeung SL, Luo S, Schooling CM (2018) The Impact of Glycated Hemoglobin (HbA1c) on Cardiovascular Disease Risk: A Mendelian Randomization Study Using UK Biobank. *Diabetes care* 41(9): 1991-1997. 10.2337/dc18-0289

[66] Dawson LP, Fairley JL, Papandony MC, Hussain SM, Cicuttini FM, Wluka AE (2018) Is abnormal glucose tolerance or diabetes a risk factor for knee, hip, or hand osteoarthritis? A systematic review. *Seminars in arthritis and rheumatism* 48(2): 176-189. 10.1016/j.semarthrit.2018.02.008

- [67] Harati H, Zanetti D, Rao A, et al. (2019) No evidence of a causal association of type 2 diabetes and glucose metabolism with atrial fibrillation. *Diabetologia* 62(5): 800-804. 10.1007/s00125-019-4836-y
- [68] Hope C, Robertshaw A, Cheung KL, Idris I, English E (2016) Relationship between HbA1c and cancer in people with or without diabetes: a systematic review. *Diabetic medicine : a journal of the British Diabetic Association* 33(8): 1013-1025. 10.1111/dme.13031
- [69] Lamport DJ, Lawton CL, Mansfield MW, Dye L (2009) Impairments in glucose tolerance can have a negative impact on cognitive function: a systematic research review. *Neuroscience and biobehavioral reviews* 33(3): 394-413. 10.1016/j.neubiorev.2008.10.008
- [70] Monteiro-Soares M, Boyko EJ, Ribeiro J, Ribeiro I, Dinis-Ribeiro M (2012) Predictive factors for diabetic foot ulceration: a systematic review. *Diabetes/metabolism research and reviews* 28(7): 574-600. 10.1002/dmrr.2319
- [71] Santaguida PL, Balion C, Hunt D, et al. (2005) Diagnosis, prognosis, and treatment of impaired glucose tolerance and impaired fasting glucose. HTA Database
- [72] van Durme C, van Echteld I, Falzon L, Aletaha D, van der Heijde D, Landewe RB (2014) Cardiovascular Risk Factors and Comorbidities in Patients with Hyperuricemia and/or Gout: A Systematic Review of the Literature. *Journal of Rheumatology* 41: 9-14. 10.3899/jrheum.140457
- [73] Viera AJ (2011) Predisease: when does it make sense? *Epidemiologic reviews* 33: 122-134. 10.1093/epirev/mxr002
- [74] (2020) Prediabetes and Peripheral Neuropathy. *Podiatry Management* 39(1): 55-56
- [75] Papunen S, Mustakallio-Könönen A, Auvinen J, Timonen M, Keinänen-Kiukaanniemi S, Sebert S (2020) The association between diabetes and cognitive changes during aging. *Scand J Prim Health Care* 38(3): 281-290. 10.1080/02813432.2020.1802140
- [76] Kirthi V, Perumbalath A, Brown E, et al. (2021) Prevalence of peripheral neuropathy in pre-diabetes: a systematic review. *BMJ Open Diabetes Res Care* 9(1). 10.1136/bmjdr-2020-002040
- [77] Wang DQ, Wang L, Wei MM, et al. (2020) Relationship Between Type 2 Diabetes and White Matter Hyperintensity: A Systematic Review. *Front Endocrinol (Lausanne)* 11: 595962. 10.3389/fendo.2020.595962
- [78] Coutinho M, Gerstein HC, Wang Y, Yusuf S (1999) The relationship between glucose and incident cardiovascular events. A metaregression analysis of published data from 20 studies of 95,783 individuals followed for 12.4 years. *Diabetes care* 22(2): 233-240. 10.2337/diacare.22.2.233
- [79] Ford ES, Zhao G, Li C (2010) Pre-diabetes and the risk for cardiovascular disease: a systematic review of the evidence. *Journal of the American College of Cardiology* 55(13): 1310-1317. 10.1016/j.jacc.2009.10.060
- [80] Huang Y, Cai X, Chen P, et al. (2014) Associations of prediabetes with all-cause and cardiovascular mortality: a meta-analysis. *Annals of medicine* 46(8): 684-692. 10.3109/07853890.2014.955051

- [81] Lee M, Saver JL, Hong KS, Song S, Chang KH, Ovbiagele B (2012) Effect of pre-diabetes on future risk of stroke: meta-analysis. *BMJ (Clinical research ed)* 344: e3564. 10.1136/bmj.e3564
- [82] Levitan EB, Song YQ, Ford ES, Liu SM (2004) Is nondiabetic hyperglycemia a risk factor for cardiovascular disease? A meta-analysis of prospective studies. *Archives of internal medicine* 164(19): 2147-2155. 10.1001/archinte.164.19.2147
- [83] Thomas G, Sehgal AR, Kashyap SR, Srinivas TR, Kirwan JP, Navaneethan SD (2011) Metabolic syndrome and kidney disease: a systematic review and meta-analysis. *Clinical journal of the American Society of Nephrology : CJASN* 6(10): 2364-2373. 10.2215/cjn.02180311
- [84] Xu T, Liu W, Cai X, et al. (2015) Risk of Coronary Heart Disease in Different Criterion of Impaired Fasting Glucose: A Meta-Analysis. *Medicine* 94(40): e1740. 10.1097/MD.0000000000001740
- [85] Gujral UP, Jagannathan R, He S, et al. (2021) Association between varying cut-points of intermediate hyperglycemia and risk of mortality, cardiovascular events and chronic kidney disease: a systematic review and meta-analysis. *BMJ Open Diabetes Res Care* 9(1). 10.1136/bmjdr-2020-001776
- [86] Chen H, Diu Y, Bhowmik D, Birtcher K, Mortazavi A (2009) Meta-Analysis of the Association between HbA1c Change and Macrovascular Event Risk. *Diabetes* 58: A190-A190
- [87] Erqou S, Lee CTC, Suffoletto M, et al. (2012) Association between Glycated Haemoglobin and the Risk of Congestive Heart Failure in Diabetes Mellitus-Systematic Review and Meta-Analysis. *Diabetes* 61: A78-A78
- [88] Hopper IK, Billah B, Skiba MA, Krum H (2010) Prevention of Diabetes and Reduction in Major Cardiovascular Events in Studies of Subjects with Impaired Glucose Tolerance: Meta-analysis of Randomized Controlled Clinical Trials. *Circulation* 122(21)
- [89] Horikawa C, Kodama S, Tajima R, et al. (2012) Effectiveness of Non-Diagnostic Levels of HbA1c or Fasting Plasma Glucose for Diagnosing and Predicting Diabetes Mellitus: Meta-Analysis. *Diabetes* 61: A366-A366
- [90] Thiagarajan Srinivasan B, Khunti K, Gray LJ, et al. (2011) Progression rates from pre-diabetes to Type 2 diabetes: a systematic review and meta-analysis. *Diabetic medicine* 28: 2-. 10.1111/j.1464-5491.2011.03232\_2.x
- [91] Papanas N, Maltezos E (2015) Glycated Hemoglobin as a Risk Factor for Lower Extremity Amputations in Diabetes: "Success Is Counted Sweetest". *The international journal of lower extremity wounds* 14(2): 106-107. 10.1177/1534734615592313
- [92] Robinson CA, Abdel-Motagally M (2011) Comment on: Zhang et al. A1C level and future risk of diabetes: a systematic review. *Diabetes Care* 2010;33:1665-1673. *Diabetes care* 34(2): e20; author reply e21. 10.2337/dc10-1901
- [93] Desai R, Bhuvra R, Sachdeva S, et al. (2020) IMPACT OF PREDIABETES ON LONG-TERM OUTCOMES OF PERCUTANEOUS CORONARY INTERVENTION: A SYSTEMATIC REVIEW AND META-ANALYSIS OF 23,019 PROCEDURES. *Journal of the American College of Cardiology* 75(11): 1362-1362

- [94] Chen P, Ong RTH, Tay WT, et al. (2013) A study assessing the association of glycosylated hemoglobin a1C (HbA1c) associated variants with HbA1c, chronic kidney disease and diabetic retinopathy in populations of asian ancestry. *PLoS one* 8(11): e79767. 10.1371/journal.pone.0079767
- [95] Nagai M, Murakami Y, Tamakoshi A, et al. (2017) Fasting but not casual blood glucose is associated with pancreatic cancer mortality in Japanese: EPOCH-JAPAN. *Cancer causes & control : CCC* 28(6): 625-633. 10.1007/s10552-017-0884-0
- [96] Sarwar N, Gao P, Seshasai SR, et al. (2010) Diabetes mellitus, fasting blood glucose concentration, and risk of vascular disease: a collaborative meta-analysis of 102 prospective studies. *Lancet (London, England)* 375(9733): 2215-2222. 10.1016/s0140-6736(10)60484-9
- [97] Schottker B, Rathmann W, Herder C, et al. (2016) HbA(1c) levels in non-diabetic older adults No J-shaped associations with primary cardiovascular events, cardiovascular and all-cause mortality after adjustment for confounders in a meta-analysis of individual participant data from six cohort studies. *BMC medicine* 14. 10.1186/s12916-016-0570-1
- [98] Cavero-Redondo I, Peleteiro B, Álvarez-Bueno C, Rodríguez-Artalejo F, Martínez-Vizcaíno V (2016) Glycosylated haemoglobin as a predictor of cardiovascular events and mortality: a protocol for a systematic review and meta-analysis. *BMJ open* 6(7): e012229. 10.1136/bmjopen-2016-012229
- [99] Jadhakhan F, Marshall T, Gill P (2015) A systematic review investigating the cumulative incidence of chronic kidney disease in young adults with impaired glucose tolerance. *Systematic reviews* 4(1): 69. 10.1186/s13643-015-0059-6
- [100] Shi R, Diao KY, Shi K, et al. (2020) Effect of prediabetes on the long-term all-cause mortality of patients undergoing percutaneous coronary intervention: A protocol for systematic review and meta analysis. *Medicine (Baltimore)* 99(33): e21623. 10.1097/md.00000000000021623
- [101] Chen S, Zhang Q, Dai G, et al. (2016) Association of depression with pre-diabetes, undiagnosed diabetes, and previously diagnosed diabetes: a meta-analysis. *Endocrine* 53(1): 35-46. 10.1007/s12020-016-0869-x
- [102] Nouwen A, Nefs G, Caramlau I, et al. (2011) Prevalence of depression in individuals with impaired glucose metabolism or undiagnosed diabetes: a systematic review and meta-analysis of the European Depression in Diabetes (EDID) Research Consortium. *Diabetes care* 34(3): 752-762. 10.2337/dc10-1414
- [103] Al-Aali KA (2019) Does Prediabetic State Affects Dental Implant Health? A Systematic Review And Meta-Analysis. *Bioscience Biotechnology Research Communications* 12(4): 844-854. 10.21786/bbrc/12.4/3
- [104] Butler AE, English E, Kilpatrick ES, et al. (2020) Diagnosing type 2 diabetes using Hemoglobin A1c: a systematic review and meta-analysis of the diagnostic cutpoint based on microvascular complications. *Acta Diabetol.* 10.1007/s00592-020-01606-5
- [105] Chinnasamy A, Moodie M (2020) Prevalence of Undiagnosed Diabetes and Prediabetes in the Dental Setting: A Systematic Review and Meta-Analysis. *Int J Dent* 2020: 2964020. 10.1155/2020/2964020
- [106] Eleftheriadou A, Williams S, Nevitt S, et al. (2020) The prevalence of cardiac autonomic neuropathy in prediabetes: a systematic review. *Diabetologia.* 10.1007/s00125-020-05316-z

- [107] Laichuthai N, Abdul-Ghani M, Kosiborod M, Parksook WW, Kerr SJ, DeFronzo RA (2020) Newly Discovered Abnormal Glucose Tolerance in Patients With Acute Myocardial Infarction and Cardiovascular Outcomes: A Meta-analysis. *Diabetes Care* 43(8): 1958-1966. 10.2337/dc20-0059
- [108] Zhou JB, Tang XY, Han YP, Luo FQ, Cardoso MA, Qi L (2020) Prediabetes and structural brain abnormalities: Evidence from observational studies. *Diabetes Metab Res Rev* 36(4): e3261. 10.1002/dmrr.3261
- [109] Richter B, Hemmingsen B, Metzendorf MI, Takwoingi Y (2018) Development of type 2 diabetes mellitus in people with intermediate hyperglycaemia. *The Cochrane database of systematic reviews* 10: CD012661. 10.1002/14651858.CD012661.pub2
- [110] Lee CMY, Colagiuri S, Woodward M, et al. (2019) Comparing different definitions of prediabetes with subsequent risk of diabetes: an individual participant data meta-analysis involving 76 513 individuals and 8208 cases of incident diabetes. *BMJ Open Diabetes Res Care* 7(1): e000794. 10.1136/bmjdr-2019-000794
- [111] Mitsios J, Ekinici E, Mitsios G, Churilov L, Thijs V (2017) Relationship between glycated haemoglobin (HbA1c) and acute stroke risk: a systematic review and meta-analysis. *International Journal of Stroke* 12: 9-9
- [112] Pan Y, Chen W, Wang Y (2019) Prediabetes and Outcome of Ischemic Stroke or Transient Ischemic Attack: A Systematic Review and Meta-analysis. *Journal of stroke and cerebrovascular diseases : the official journal of National Stroke Association* 28(3): 683-692. 10.1016/j.jstrokecerebrovasdis.2018.11.008
- [113] Xue M, Xu W, Ou YN, et al. (2019) Diabetes mellitus and risks of cognitive impairment and dementia: a systematic review and meta-analysis of 144 prospective studies. *Ageing research reviews* 55: 100944. 10.1016/j.arr.2019.100944
- [114] Cai X, Zhang Y, Li M, et al. (2020) Association between prediabetes and risk of all cause mortality and cardiovascular disease: updated meta-analysis. *Bmj* 370: m2297. 10.1136/bmj.m2297
- [115] Li Y, Li XW, Zhang YH, et al. (2020) Prognostic significance of the hemoglobin A1c level in non-diabetic patients undergoing percutaneous coronary intervention: a meta-analysis. *Chin Med J (Engl)* 133(18): 2229-2235. 10.1097/cm9.0000000000001029
- [116] Huang Y, Cai X, Mai W, Li M, Hu Y (2016) Association between prediabetes and risk of cardiovascular disease and all cause mortality: systematic review and meta-analysis. *BMJ (Clinical research ed)* 355: i5953. 10.1136/bmj.i5953
- [117] Mitsios JP, Ekinici EI, Mitsios GP, Churilov L, Thijs V (2018) Relationship Between Glycated Hemoglobin and Stroke Risk: A Systematic Review and Meta-Analysis. *Journal of the American Heart Association* 7(11): 1-10. 10.1161/JAHA.117.007858
- [118] Aune D, Feng T, Schlesinger S, Janszky I, Norat T, Riboli E (2018) Diabetes mellitus, blood glucose and the risk of atrial fibrillation: A systematic review and meta-analysis of cohort studies. *Journal of diabetes and its complications* 32(5): 501-511. 10.1016/j.jdiacomp.2018.02.004
- [119] Aune D, Schlesinger S, Norat T, Riboli E (2018) Diabetes mellitus and the risk of sudden cardiac death: A systematic review and meta-analysis of prospective studies. *Nutrition, metabolism, and cardiovascular diseases : NMCD* 28(6): 543-556. 10.1016/j.numecd.2018.02.011

- [120] Zhao Y, Guo M, Shi G (2020) Prediabetes predicts adverse cardiovascular outcomes after percutaneous coronary intervention: a meta-analysis. *Biosci Rep* 40(1). 10.1042/bsr20193130
- [121] Echouffo-Tcheugui JB, Venkat Narayan KM, Weisman D, Golden SH, Jaar BG (2016) Association between prediabetes and risk of chronic kidney disease: a systematic review and meta-analysis. *Diabetic medicine : a journal of the British Diabetic Association* 33(12): 1615-1624. 10.1111/dme.13113
- [122] Mutie PM, Pomares-Millan H, Atabaki-Pasdar N, et al. (2020) An investigation of causal relationships between prediabetes and vascular complications. *Nat Commun* 11(1): 4592. 10.1038/s41467-020-18386-9
- [123] Huang Y, Cai X, Qiu M, et al. (2014) Prediabetes and the risk of cancer: a meta-analysis. *Diabetologia* 57(11): 2261-2269. 10.1007/s00125-014-3361-2
- [124] Xu WG, Qian YF, Wu J (2017) The effect of prediabetes on hepatocellular carcinoma risk: a systematic review and meta-analysis. *Minerva medica* 108(2): 185-190. 10.23736/s0026-4806.16.04601-2
- [125] Fu DX, Cui HB, Guo NN, Su N, Xu JX, Wang GY (2016) Prediabetes and the risk of pancreatic cancer: A meta-analysis. *International journal of clinical and experimental medicine* 9(10): 19474-19479
- [126] Tong A, Wang X, Li F, Xu F, Li Q, Zhang F (2016) Risk of depressive symptoms associated with impaired glucose metabolism, newly diagnosed diabetes, and previously diagnosed diabetes: a meta-analysis of prospective cohort studies. *Acta diabetologica* 53(4): 589-598. 10.1007/s00592-016-0845-1
- [127] Cai X, Liu X, Sun L, et al. (2021) Prediabetes and the risk of heart failure: A meta-analysis. *Diabetes Obes Metab*. 10.1111/dom.14388
